# Supplementary material for: Contingency in the convergent evolution of a regulatory network: Dosage compensation in Drosophila
Source: PLoS Biol. 2019 Feb 11;17(2):e3000094. doi: 10.1371/journal.pbio.3000094 (PMC6417741; doi:10.1371/journal.pbio.3000094)
Supplement: S3 Data — Male/female gene expression ratios are plotted in Fig 3A. RNA-seq, RNA sequencing. (XLSX) [file pbio.3000094.s016.xlsx]

## Sheet: D.melanica
Chromosome	Scaffold	Gene_Start	Gene_Stop	Male_FPKM	Female_FPKM
3L	scaffold1000.1	62	3417	34.3981	35.7308
3L	scaffold1000.1	28484	30412	1041.64	712.26
3L	scaffold1000.1	30499	31397	187.671	222.902
3L	scaffold1000.1	32801	40465	31.4395	38.5152
2R	scaffold100.1	61656	63336	7.46939	7.17148
2R	scaffold100.1	29898	58460	18.0023	22.1877
2R	scaffold1001.1	6478	7646	38.8606	23.2174
2R	scaffold1001.1	9836	12035	36.6333	39.6972
2R	scaffold1001.1	11617	13147	29.661	26.2712
2R	scaffold1001.1	17146	18177	39.2715	27.6454
2R	scaffold1001.1	19252	22029	21.2082	18.9304
2R	scaffold1001.1	13689	17957	15.0878	15.4302
X	scaffold1002.1	16808	18245	7.5305	16.7289
X	scaffold1002.1	18818	19522	6.92782	23.0989
3R	scaffold1003.1	11988	16088	14.763	11.1856
3R	scaffold1003.1	16142	18527	20.393	16.7364
3L	scaffold1004.1	356	8228	158.895	86.5534
3L	scaffold1004.1	8847	9798	93.9168	119.494
3L	scaffold1004.1	34649	36794	379.318	332.372
3L	scaffold1004.1	14380	18518	30.2241	39.1433
3R	scaffold1008.1	5079	6318	25.876	28.0877
3R	scaffold1008.1	27393	29369	21.5828	21.864
3R	scaffold1008.1	29465	30155	11.9021	10.1881
3R	scaffold1008.1	30218	31223	16.4181	20.4547
3R	scaffold1008.1	31472	32661	192.385	149.728
3R	scaffold1008.1	33146	35308	14.8823	12.4465
3R	scaffold1008.1	35817	37976	8.4496	6.82351
3R	scaffold1008.1	38612	41063	17.611	15.7064
3R	scaffold1008.1	41144	42224	14.2204	15.0719
3R	scaffold1008.1	42348	46156	36.3827	37.9778
2L	scaffold1009.1	10157	16353	37.0572	30.119
2R	scaffold10.1	35581	36776	22.0185	24.2522
2R	scaffold10.1	88347	89718	10.9448	362.993
2R	scaffold10.1	134783	135898	61.9875	66.8675
2R	scaffold10.1	135958	137821	27.419	23.8446
2R	scaffold10.1	138396	139252	1156.66	912.496
2R	scaffold10.1	141194	142639	10.1166	15.3787
2R	scaffold10.1	142993	145156	16.152	15.6765
2R	scaffold10.1	168493	171429	46.2619	51.7837
2R	scaffold10.1	241926	243706	37.8139	24.8291
2R	scaffold10.1	244062	245651	18.8409	19.6232
2R	scaffold10.1	246291	253555	546.553	623.999
2R	scaffold10.1	253952	255807	36.6647	25.1714
2R	scaffold10.1	260227	262047	38.274	40.9482
2R	scaffold10.1	262905	272849	66.3187	76.291
2R	scaffold10.1	273712	274303	29.499	25.9888
2R	scaffold10.1	36922	50192	22.9218	21.1151
2R	scaffold10.1	109910	116403	123.463	132.58
2R	scaffold10.1	146453	160734	34.4855	27.2537
2R	scaffold10.1	163515	165278	41.7515	27.4829
2R	scaffold10.1	204542	235589	92.7689	56.8231
2R	scaffold10.1	275107	283562	10.1428	9.04842
2R	scaffold1010.1	10449	13301	163.343	69.8438
2R	scaffold1010.1	33063	37901	11.3004	12.7901
2R	scaffold1010.1	32332	33001	14.2806	16.7319
2R	scaffold101.1	12811	15833	21.5922	19.618
2R	scaffold101.1	22237	24249	39.0508	39.3514
2R	scaffold101.1	24671	25935	36.8936	34.1557
2R	scaffold101.1	26033	27968	37.9614	45.2655
2R	scaffold101.1	42169	46557	336.326	363.43
2R	scaffold101.1	52514	55907	46.6057	48.697
2R	scaffold101.1	56284	57938	22.7589	29.4025
2R	scaffold101.1	59235	60421	24.9957	20.9615
2R	scaffold101.1	60635	61539	26.0359	21.3327
2R	scaffold101.1	16257	22157	27.4156	27.1131
2R	scaffold101.1	48863	50996	15.566	21.9249
2R	scaffold101.1	65258	75923	38.7836	39.0055
3L	scaffold1013.1	93	5957	10.8086	11.9267
3L	scaffold1013.1	7034	9522	8.82989	8.74131
3L	scaffold1013.1	9644	11125	38.1103	38.4699
3L	scaffold1013.1	19329	21604	15.9837	14.1011
3L	scaffold1013.1	21722	22841	17.147	20.366
3L	scaffold1013.1	22918	23578	17.2519	14.9814
3L	scaffold1013.1	23886	25763	8.27394	7.08552
3L	scaffold1013.1	26124	26638	13.7132	17.4063
3L	scaffold1013.1	34985	42663	25.2135	24.1068
3L	scaffold1013.1	42722	43488	15.3429	11.929
3L	scaffold1013.1	43631	45581	24.9098	22.8029
3L	scaffold1013.1	11992	18390	15.1644	17.7778
3L	scaffold1013.1	49121	50443	13.4033	15.6075
3R	scaffold1014.1	11876	12961	14.1551	12.2649
3R	scaffold1014.1	24148	26324	11.5161	8.91065
3R	scaffold1014.1	26827	30450	12.2236	12.8556
3R	scaffold1014.1	28506	32294	19.0461	18.5826
3R	scaffold1014.1	13610	17921	267.67	286.818
2R	scaffold1015.1	22968	26094	26.1822	29.2776
2R	scaffold1015.1	27806	29450	7.36437	5.75483
2R	scaffold1015.1	29900	32047	54.9663	45.4493
2R	scaffold1015.1	32976	33479	24.3254	13.1515
2R	scaffold1015.1	33546	35337	11.1546	9.66099
2R	scaffold1015.1	37149	38371	42.8644	51.1377
2R	scaffold1018.1	752	4635	17.0498	14.3244
2R	scaffold1018.1	4691	17508	15.8817	16.8486
2R	scaffold1019.1	7834	11518	16.1089	16.3064
2R	scaffold1019.1	2141	3760	11.576	10.3239
2R	scaffold1019.1	5946	6797	7.22604	5.66297
2R	scaffold1019.1	12889	28155	17.3308	16.3974
2R	scaffold1020.1	3488	7259	18.2905	15.6075
2R	scaffold1020.1	9373	10857	50.9204	44.207
X	scaffold102.1	39519	40746	7.5607	5.89572
X	scaffold102.1	41030	46097	16.475	16.8987
X	scaffold102.1	50934	54747	29.4908	31.9972
X	scaffold102.1	59780	61423	14.3035	22.5959
X	scaffold102.1	63710	65340	17.8071	17.9886
X	scaffold102.1	72166	76303	131.167	119.322
X	scaffold102.1	100830	101415	11.5023	13.0317
X	scaffold102.1	20122	39458	13.4094	12.8048
X	scaffold102.1	49037	50571	705.04	720.248
X	scaffold102.1	80224	84521	19.0471	26.046
3R	scaffold1021.1	18602	26615	37.3609	27.537
3R	scaffold1021.1	29929	31631	11.4099	9.81658
3R	scaffold1021.1	34067	36116	379.498	462.167
3R	scaffold1021.1	36313	37528	43.9053	29.6033
3R	scaffold1021.1	31696	33818	17.4893	21.1053
3L	scaffold1023.1	720	3689	82.7199	82.3571
3L	scaffold1023.1	3819	9529	74.1676	58.96
3L	scaffold1023.1	11996	12814	27.9295	21.9366
3L	scaffold1023.1	12988	16091	75.6768	52.7037
3L	scaffold1023.1	16608	17752	12.1028	13.0846
3L	scaffold1023.1	17966	19306	805.774	785.888
3L	scaffold1023.1	19441	21125	35.0141	41.6751
3L	scaffold1023.1	21492	23462	20.3928	14.1633
2R	scaffold1024.1	20617	22748	16.7725	18.3665
X	scaffold1026.1	7943	8919	59.904	59.452
X	scaffold1026.1	9546	16275	34.6759	26.7537
X	scaffold1026.1	19204	20749	17.842	23.37
X	scaffold1026.1	21879	23961	9.55574	8.35784
3R	scaffold1030.1	2427	9148	18.015	19.4465
3R	scaffold1030.1	9401	11513	14.4698	14.8976
3R	scaffold1030.1	18605	19416	21.0561	15.8122
3R	scaffold1030.1	25306	30304	41.341	36.0412
3L	scaffold103.1	989	2136	14.4486	16.4465
3L	scaffold103.1	2166	3576	81.4493	34.3917
3L	scaffold103.1	11110	11876	120.084	165.069
3L	scaffold103.1	43074	48549	16.3837	16.5545
3L	scaffold103.1	48825	50866	12.5669	12.1761
3L	scaffold1033.1	2053	4062	5.61922	35.2207
3L	scaffold1033.1	8797	9911	14.0266	15.1048
3L	scaffold1033.1	19995	20904	10.4155	21.3601
3L	scaffold1033.1	28666	32035	95.2324	133.578
3L	scaffold1033.1	33373	35829	32.0914	35.7017
3L	scaffold1033.1	37847	40599	10.79	5.0095
3L	scaffold1033.1	15242	19735	12.6079	10.415
X	scaffold1034.1	7846	9284	19.9397	18.9867
X	scaffold1034.1	9354	10788	878.72	888.923
X	scaffold1034.1	13699	15460	489.713	558.014
X	scaffold1034.1	16468	17380	36.0255	31.0494
X	scaffold1034.1	17883	20128	55.888	65.3904
X	scaffold1034.1	20857	21755	40.4893	33.6247
X	scaffold1034.1	21659	26206	874.056	799.57
3L	scaffold1035.1	669	13336	21.7015	13.3551
3L	scaffold1036.1	10110	12637	25.156	22.7106
3L	scaffold1036.1	17367	18563	14.7471	14.13
3L	scaffold1036.1	20771	24130	22.7271	23.119
3L	scaffold1036.1	25705	27096	59.836	74.6676
X	scaffold1038.1	13833	14764	15.2714	14.3235
2L	scaffold1039.1	6469	9099	32.2432	36.2891
2L	scaffold1039.1	9473	12700	23.8168	23.2446
2L	scaffold1039.1	14506	18150	193.473	197.581
X	scaffold1040.1	1236	7059	41.7166	41.8775
X	scaffold1040.1	7369	7952	16.2015	19.0248
X	scaffold1040.1	15804	20000	18.8599	17.4723
X	scaffold104.1	4642	6180	139.048	196.106
X	scaffold104.1	7128	14552	17.3773	16.5335
X	scaffold104.1	30948	31850	74.881	114.014
X	scaffold104.1	93693	95741	9.07826	7.37925
3L	scaffold1041.1	16520	17565	14.2803	23.4539
X	scaffold1042.1	9241	14441	35.8283	38.0492
X	scaffold1042.1	17761	19588	10.3611	12.995
X	scaffold1042.1	21094	22820	12.8266	12.5237
X	scaffold1042.1	25281	36166	29.1049	35.3262
2R	scaffold1043.1	832	3377	24.135	26.0004
2R	scaffold1043.1	8064	9062	14.7213	14.4111
2R	scaffold1043.1	9188	27051	33.7662	37.0018
3R	scaffold1044.1	1508	3375	21.8182	24.1974
3R	scaffold1044.1	3434	14030	11.2352	8.13758
3R	scaffold1044.1	24931	26907	7.29819	7.39398
3R	scaffold1044.1	29572	31000	9.65049	8.43478
3R	scaffold1044.1	32872	36380	43.3856	35.7691
3R	scaffold1044.1	31384	32816	23.7139	17.8558
2R	scaffold1049.1	43297	43953	15.5029	10.6307
2R	scaffold1049.1	46566	48738	13.136	12.3698
2R	scaffold1049.1	49363	52433	17.7378	13.9112
2R	scaffold1049.1	54058	56063	17.2513	11.8095
4	scaffold1050.1	1892	2459	7.3542	7.9262
4	scaffold1050.1	6263	11187	12.9231	9.13522
4	scaffold1050.1	28253	32527	9.4434	6.99873
4	scaffold1050.1	33017	39323	17.5937	16.1788
4	scaffold1050.1	39406	42000	13.6322	13.34
2L	scaffold105.1	39	877	35.4718	25.6273
2L	scaffold105.1	2827	4615	72.5558	52.8522
2L	scaffold105.1	7329	8071	29.026	19.8923
2L	scaffold105.1	8372	9039	25.4141	28.159
2L	scaffold105.1	27816	29733	41.8664	38.2195
2L	scaffold105.1	35590	37173	998.521	733.264
2L	scaffold105.1	32492	34835	909.723	602.206
2L	scaffold105.1	65249	67698	18.4425	26.6255
X	scaffold1051.1	1	3156	13.6478	12.9789
X	scaffold1051.1	4444	9229	32.4309	38.1614
X	scaffold1051.1	22429	23781	61.0438	42.9963
X	scaffold1051.1	9399	22627	21.8102	25.1804
2L	scaffold1052.1	257	2754	22.7887	19.8595
2L	scaffold1052.1	9280	11193	9.29816	10.6433
2L	scaffold1052.1	11682	13345	12.306	9.06659
2L	scaffold1052.1	19582	23698	46.9908	47.6973
2L	scaffold1052.1	14975	16929	36.8156	30.3396
3L	scaffold1053.1	1083	3927	347.359	317.884
3L	scaffold1053.1	6090	9404	11.9949	9.11118
2L	scaffold1054.1	1896	3734	9.55596	8.8759
2L	scaffold1054.1	3797	10298	19.0091	22.3863
2L	scaffold1054.1	12998	14996	20.8841	20.3907
2L	scaffold1054.1	15065	15785	17.3262	17.2347
2L	scaffold1054.1	17168	17939	77.5327	92.592
2L	scaffold1054.1	17987	22598	41.3763	33.2288
2L	scaffold1054.1	22655	23479	26.8542	24.755
3L	scaffold1055.1	4175	4813	48.4913	62.1547
3L	scaffold1055.1	4862	7443	19.1266	18.8259
2R	scaffold1057.1	29743	30429	24.9652	27.5692
X	scaffold1058.1	5758	6550	719.629	1343.67
X	scaffold1058.1	7425	8452	816.048	985.223
X	scaffold1058.1	9503	10431	61.8184	50.1701
X	scaffold1058.1	13340	14038	941.531	1939.21
X	scaffold1059.1	3059	13057	21.2035	27.8079
X	scaffold1059.1	21183	22639	16.8774	18.1784
2L	scaffold1060.1	7350	15206	67.3569	78.9427
3L	scaffold1063.1	33099	35661	16.3462	9.61345
2R	scaffold1064.1	4387	5631	13.5916	13.9995
2R	scaffold1064.1	13085	13948	9.42314	8.4381
2R	scaffold1064.1	17167	18827	35.9713	70.4035
2R	scaffold1064.1	15565	16818	20.9918	21.4461
3L	scaffold1066.1	49	799	382.964	445.588
3L	scaffold1066.1	1584	7642	535.247	593.383
3L	scaffold1066.1	9065	10893	21.6134	19.0811
3L	scaffold1066.1	20130	23536	45.0569	32.9016
3L	scaffold1066.1	11795	18106	10.6055	10.977
2R	scaffold1067.1	18273	18880	29.922	23.763
2R	scaffold1067.1	13566	17951	25.6035	18.7493
2L	scaffold1068.1	309	1230	14.1292	13.5229
2L	scaffold1068.1	1988	5113	26.0332	25.9876
2L	scaffold1068.1	5357	6876	35.162	41.0641
2L	scaffold1068.1	7371	11794	45.3573	95.6012
2L	scaffold1068.1	12366	14252	11.8591	16.1913
3R	scaffold1069.1	9315	10577	9.58295	6.87312
3R	scaffold1069.1	11198	12388	23.2453	7.26241
3R	scaffold1069.1	14089	14691	45.5019	31.1406
3R	scaffold1069.1	18170	21591	15.9748	14.1362
3R	scaffold1069.1	21646	23477	23.0159	27.7278
3R	scaffold1069.1	14748	17106	74.5612	128.631
3R	scaffold1069.1	14749	17096	45.8517	7.43159
2L	scaffold107.1	6567	9217	10.0611	8.39134
2L	scaffold107.1	9712	13184	32.831	23.3105
2L	scaffold107.1	16983	25677	26.2279	23.0614
2L	scaffold107.1	33653	34371	20.5988	13.1063
2L	scaffold107.1	35638	39121	34.217	39.7475
2L	scaffold107.1	39520	40546	67.9225	44.874
2L	scaffold107.1	40919	42808	14.2094	15.2119
2L	scaffold107.1	49588	53341	12.4397	10.0221
2L	scaffold107.1	55827	58176	49.9361	48.6989
2L	scaffold107.1	29950	33278	12.443	11.4047
3R	scaffold1072.1	4907	7620	51.5491	37.3144
3R	scaffold1072.1	7692	8633	39.9283	32.2972
3R	scaffold1072.1	9485	11426	20.1507	16.9867
3R	scaffold1072.1	12738	14114	277.868	344.473
3R	scaffold1072.1	14459	15066	33.3135	35.3545
3R	scaffold1072.1	18950	20777	15.029	17.2205
3R	scaffold1072.1	22057	22643	9.15275	10.725
3R	scaffold1072.1	16161	18383	29.3422	29.3141
3L	scaffold1073.1	63374	64678	59.5181	60.0048
3L	scaffold1077.1	32	1434	31.2203	30.0313
3L	scaffold1077.1	2130	5681	27.5029	32.977
3L	scaffold1077.1	10915	13285	11.4734	12.1297
3L	scaffold1077.1	16923	21861	13.9677	13.9645
3L	scaffold1077.1	22051	23403	41.644	38.223
3L	scaffold1077.1	24077	32191	81.0957	91.2816
2R	scaffold1078.1	41	659	30.1479	7.99886
2R	scaffold1078.1	7387	9655	49.6805	53.2462
2R	scaffold1078.1	9937	13489	204.568	150.107
2R	scaffold1078.1	19380	20051	16.9032	8.37318
3L	scaffold1079.1	2355	3949	200.719	149.119
3L	scaffold1079.1	4149	8625	344.668	297.754
3L	scaffold1079.1	18088	18690	64.5909	92.2118
3L	scaffold1079.1	18419	21034	18.048	20.4029
2R	scaffold108.1	60448	62154	185.407	186.193
2R	scaffold108.1	62219	64988	114.613	78.0455
2R	scaffold108.1	66355	71354	170.575	168.845
2R	scaffold108.1	71525	73961	128.128	136.995
2R	scaffold108.1	75168	75839	24.8225	19.7272
2R	scaffold108.1	82810	83988	155.568	116.618
2R	scaffold108.1	101050	102720	16.2188	13.9746
2R	scaffold108.1	102984	104270	39.0133	49.6537
2R	scaffold108.1	104591	105857	18.3472	16.9281
2R	scaffold108.1	8396	20080	15.2182	21.0163
2R	scaffold108.1	65066	66174	92.0446	74.5136
2L	scaffold1081.1	6045	6922	11.1511	6.59812
2L	scaffold1081.1	7525	8840	8.64276	11.1127
2L	scaffold1081.1	9454	10568	13.7943	14.5006
2L	scaffold1081.1	11058	13098	17.4933	16.8412
2L	scaffold1081.1	13985	14597	12.2334	8.18029
2L	scaffold1081.1	24356	33792	23.9083	25.58
3R	scaffold1082.1	1602	8711	19.5948	21.6914
3R	scaffold1082.1	10096	14262	23.5792	21.6592
3R	scaffold1082.1	19254	22148	37.5568	33.7735
3R	scaffold1082.1	23499	26224	13.011	16.8061
3R	scaffold1082.1	26741	29033	49.9878	51.0572
3R	scaffold1082.1	15283	18039	19.2931	26.9054
2R	scaffold1084.1	26216	27177	112.053	101.356
2R	scaffold1084.1	28071	29533	14.2939	15.2882
2R	scaffold1084.1	29764	30514	13.7263	13.8517
2R	scaffold1084.1	33121	36346	12.4062	12.3856
2R	scaffold1084.1	37247	39195	20.5591	25.2193
2L	scaffold1085.1	16003	16593	10.3438	6.7169
3L	scaffold1086.1	30636	32339	36.3134	33.0854
3L	scaffold1086.1	32753	34717	21.7577	22.0986
2L	scaffold1088.1	12532	13493	14.5399	10.656
2L	scaffold1088.1	18672	21181	8.49062	9.13981
2L	scaffold1088.1	30564	31809	18.4707	18.4375
2L	scaffold1088.1	13643	17571	15.1894	17.3463
2R	scaffold1089.1	4012	36774	14.1139	16.7056
2R	scaffold1089.1	42196	52935	797.488	696.769
3L	scaffold1090.1	4314	5055	40.6654	39.1495
3L	scaffold1090.1	7948	11561	30.7076	31.2818
3L	scaffold1090.1	23262	26345	17.107	17.2384
3L	scaffold1090.1	11782	20901	148.657	176.679
X	scaffold109.1	56	7832	98.7478	109.961
X	scaffold109.1	13572	15607	12.8361	9.41642
X	scaffold109.1	19798	20960	50.5273	39.3127
X	scaffold109.1	70733	71403	9.03129	6.19874
X	scaffold109.1	74496	75921	112.019	47.8728
X	scaffold109.1	77484	80030	15.133	12.8618
X	scaffold109.1	15671	16968	14.5993	19.1394
X	scaffold109.1	25340	49170	36.4368	44.7071
3L	scaffold1091.1	17271	23061	24.2831	26.2886
2R	scaffold1094.1	9360	10980	8.83869	7.51071
2R	scaffold1094.1	21718	22541	8.18341	9.9986
2R	scaffold1095.1	278	4361	14.6988	12.657
3L	scaffold1097.1	531	5766	31.0326	24.3337
3L	scaffold1097.1	11379	13165	128.196	138.398
3L	scaffold1097.1	19164	20015	11.166	15.8134
3R	scaffold1100.1	23927	25458	7.25071	8.52922
3R	scaffold1100.1	28009	29411	9.57852	9.12627
3R	scaffold1100.1	3962	18636	109.917	122.105
3L	scaffold110.1	792	3649	19.7534	21.5004
2L	scaffold1101.1	2598	3184	31.4836	30.8836
2L	scaffold1101.1	5956	13824	37.6629	34.6917
2L	scaffold1101.1	13889	16622	43.3949	39.3215
X	scaffold1102.1	14512	15777	8.84962	5.50739
X	scaffold1102.1	17073	19302	13.0997	19.1759
3R	scaffold1104.1	11839	30479	16.8286	16.3992
X	scaffold1106.1	46020	49436	32.3048	27.4525
3L	scaffold1107.1	6598	16315	13.5311	12.1968
X	scaffold1108.1	67	1980	8.35455	6.48459
X	scaffold1108.1	3200	4580	40.8343	44.5498
X	scaffold1108.1	4720	12978	54.2053	48.7871
X	scaffold1108.1	13254	14269	47.0843	36.1312
X	scaffold1108.1	14388	21948	45.8246	45.5855
X	scaffold1109.1	18803	19879	26.3959	35.3819
X	scaffold1109.1	15758	17368	805.404	663.237
2L	scaffold11.1	17105	18463	15.7845	12.6506
2L	scaffold11.1	18525	20299	16.5381	15.1677
2L	scaffold11.1	24204	26165	9.77795	12.2818
2L	scaffold11.1	26586	27322	11.8181	12.3573
2L	scaffold11.1	29607	30196	8.51559	6.68829
2L	scaffold11.1	30254	30978	11.2963	9.56622
2L	scaffold11.1	34549	35572	774.1	503.072
2L	scaffold11.1	50595	51481	9.5728	13.0188
2L	scaffold11.1	56992	57904	192.345	147.99
2L	scaffold11.1	57996	62774	22.5199	21.0025
2L	scaffold11.1	63036	64660	41.8023	43.7352
2L	scaffold11.1	74274	75180	10.8655	7.53178
2L	scaffold11.1	75776	76435	8.99941	8.21283
2L	scaffold11.1	83767	86490	13.2806	21.3803
2L	scaffold11.1	100684	109846	43.7065	40.8157
2L	scaffold11.1	109901	110585	24.301	21.959
2L	scaffold11.1	120761	121763	9.46546	5.35781
2L	scaffold11.1	10191	17043	14.4527	14.5417
2L	scaffold11.1	46882	49551	16.0612	18.284
2L	scaffold11.1	93971	98938	127.429	245.825
2L	scaffold11.1	125849	140859	12.798	11.3943
2L	scaffold1110.1	78	5140	36.4196	19.5503
2L	scaffold1110.1	8911	10512	18.9514	24.6996
2L	scaffold1110.1	11798	16043	79.7484	60.1121
2L	scaffold1110.1	17837	24294	18.8041	21.4226
2L	scaffold1110.1	25223	28401	7.95627	17.4738
2L	scaffold1110.1	28592	30764	10.9581	10.3992
2L	scaffold111.1	53571	58177	56.5662	27.5957
2L	scaffold111.1	19645	43269	22.3145	26.4394
2L	scaffold111.1	45030	52173	65.5119	72.3955
3L	scaffold1112.1	31537	33471	10.2905	6.87281
X	scaffold1113.1	16879	17797	74.2623	84.2106
X	scaffold1113.1	18501	20311	12.4559	12.4904
X	scaffold1113.1	20785	21463	8.7255	9.31374
X	scaffold1113.1	21525	22807	8.54676	11.6654
3R	scaffold1114.1	5632	22763	21.0353	21.6854
2L	scaffold1116.1	16	2435	9.94132	8.37233
2L	scaffold1116.1	6851	8532	46.3429	65.1475
2L	scaffold1116.1	9239	12869	21.1399	17.5299
2L	scaffold1116.1	12993	13969	34.4763	33.7258
2L	scaffold1116.1	14158	21398	144.22	194.862
2R	scaffold1118.1	38301	39010	4846.66	5397.43
3R	scaffold1119.1	20369	22400	22.078	19.0347
3R	scaffold1119.1	15884	18851	17.5241	23.1901
2R	scaffold1120.1	23811	24870	11.4485	18.1191
2R	scaffold1120.1	3716	22173	12.3287	13.1247
2L	scaffold112.1	1507	13852	18.3403	31.5054
2L	scaffold112.1	14685	16259	11.1748	10.5269
2L	scaffold112.1	17638	18284	8.65195	5.30584
2L	scaffold112.1	61843	62365	12.9628	16.2111
2L	scaffold112.1	102420	106434	29.9831	46.5848
2L	scaffold112.1	16334	17525	9.01787	5.84912
2L	scaffold112.1	21311	32882	17.164	22.1059
2L	scaffold112.1	31443	34855	13.7547	11.7484
2L	scaffold1121.1	1472	2898	67.4376	123.212
2L	scaffold1121.1	6753	8364	960.713	810.909
2L	scaffold1121.1	8811	10816	16.77	21.9772
2L	scaffold1121.1	32810	33483	27.3286	25.5438
2L	scaffold1121.1	13693	32735	35.2994	40.0531
2R	scaffold1122.1	21467	23700	11.5948	11.3315
X	scaffold1125.1	4924	7793	13.3609	13.6942
X	scaffold1125.1	21075	23709	268.658	522.107
3L	scaffold1126.1	7745	11060	16.7692	14.6236
3L	scaffold1126.1	12203	13130	11.6424	12.5103
3L	scaffold1126.1	18064	19064	17.2205	8.34544
3L	scaffold1126.1	19706	22409	66.1352	68.6174
3L	scaffold1126.1	21016	22620	44.2359	56.3784
3L	scaffold1126.1	14251	17533	24.4473	30.3142
2L	scaffold1127.1	9286	11058	10.9123	9.62774
3L	scaffold1129.1	35903	37336	22.6789	23.8261
2L	scaffold113.1	3	906	7.25326	10.4303
2L	scaffold113.1	3822	5183	17.7996	17.4698
2L	scaffold113.1	83059	88684	17.9097	12.5879
2L	scaffold113.1	89287	92051	10.6013	9.05593
2L	scaffold113.1	90885	96739	49.1864	120.009
2L	scaffold113.1	100843	102574	13.3111	10.7235
2L	scaffold113.1	120653	126599	123.484	138.021
2L	scaffold113.1	127745	128984	66.8947	37.9566
2R	scaffold1136.1	11	2353	9.33061	11.1669
2R	scaffold1136.1	2863	4052	9.61434	12.1299
2R	scaffold1136.1	7301	9735	712.486	938.915
2R	scaffold1136.1	10027	14078	492.519	587.341
2R	scaffold1136.1	18150	20405	11.4081	13.5045
2R	scaffold1136.1	22367	25007	12.8066	14.664
2R	scaffold1136.1	25834	27317	12.5588	14.0306
2R	scaffold1136.1	16318	17579	7.28992	6.72088
3L	scaffold1137.1	23628	25092	16.9089	12.2519
X	scaffold1138.1	298	12873	12.8968	15.7036
X	scaffold1138.1	19862	21015	9.83178	7.69877
3R	scaffold1139.1	1213	4566	10.4062	10.4447
3R	scaffold1139.1	4640	6939	10.9873	11.1805
3R	scaffold1139.1	12748	13919	16.5689	17.666
3R	scaffold1139.1	14003	22495	100.562	71.8074
2R	scaffold1140.1	841	2268	7.51886	8.72649
2R	scaffold1140.1	3046	6163	7.40976	10.209
2R	scaffold1140.1	6996	9265	202.738	202.316
2R	scaffold1140.1	9917	17928	79.6405	83.0662
2L	scaffold114.1	585	3414	90.6617	92.9552
2L	scaffold114.1	3763	8474	11.5732	9.5274
2L	scaffold114.1	3763	5150	7.56901	5.44199
2L	scaffold114.1	8525	10045	9.35633	2.35046
2L	scaffold114.1	13566	14458	22.2771	22.5024
2L	scaffold114.1	26677	29422	12.779	11.3615
2L	scaffold114.1	35267	37438	7.86512	7.06388
2L	scaffold114.1	67547	70372	44.6581	37.8329
2L	scaffold114.1	72585	74289	38.3513	36.0017
2L	scaffold114.1	85149	86443	13.3909	12.3227
2L	scaffold114.1	86886	90090	11.1174	8.51763
2L	scaffold114.1	91839	92712	39.7933	58.6597
2L	scaffold114.1	92764	93664	19.2788	15.2393
2L	scaffold114.1	94118	94961	26.4281	31.57
2L	scaffold114.1	101239	102794	9.30413	9.88162
2L	scaffold114.1	104608	105628	20.2636	12.4434
2L	scaffold114.1	106011	107347	18.167	15.5486
2L	scaffold114.1	107631	108495	21.5433	19.5232
2L	scaffold114.1	108629	109383	15.4046	17.5418
2L	scaffold114.1	109891	110997	134.309	160.189
2L	scaffold114.1	114946	115803	15.879	21.1717
2L	scaffold114.1	14529	26401	12.9996	13.373
2L	scaffold114.1	74487	82826	23.2643	19.2265
2L	scaffold114.1	111391	114865	20.6005	20.3328
3R	scaffold1141.1	6416	11460	22.3013	25.3842
X	scaffold1142.1	1761	12421	65.8673	62.1198
X	scaffold1142.1	12533	14548	19.3889	9.32334
X	scaffold1142.1	14646	20578	20.9321	12.3017
2R	scaffold1149.1	18661	19835	287.167	157.223
2R	scaffold1149.1	27891	28488	7.31767	4.98009
2R	scaffold1149.1	34984	35683	10.057	4.9627
2R	scaffold1149.1	15762	16939	7.51861	7.58429
2L	scaffold115.1	4970	7513	25.7421	29.5041
2L	scaffold115.1	10864	12483	16.8658	16.468
2L	scaffold115.1	34614	35319	7.21199	4.3799
2L	scaffold115.1	39763	40463	7.00363	4.53093
2L	scaffold115.1	42412	45603	8.80877	9.38304
2L	scaffold1151.1	4447	16983	54.2779	67.2969
3L	scaffold1152.1	18333	20325	11.8618	13.7155
3L	scaffold1152.1	21440	23080	14.0512	12.0427
3L	scaffold1152.1	24053	26586	46.9268	39.4643
3L	scaffold1152.1	26205	28623	57.7353	51.3434
X	scaffold1155.1	670	1734	32.6989	8.3656
3L	scaffold1157.1	9346	20861	15.3314	11.4245
2R	scaffold1158.1	5703	7377	12.4594	11.7448
2R	scaffold1158.1	7555	8789	11.8858	10.0283
2R	scaffold1158.1	8859	9944	10.3082	11.5679
2R	scaffold1158.1	10784	12957	9.99901	10.4699
2R	scaffold1158.1	13733	15144	898.657	680.51
2L	scaffold1160.1	387	951	7.33131	6.18382
2L	scaffold1160.1	5907	6521	13.2429	17.1893
2L	scaffold1160.1	6845	7442	10.1244	8.31315
2L	scaffold1160.1	20854	24733	67.5312	46.5325
2R	scaffold116.1	22378	24814	67.268	55.053
2R	scaffold116.1	25041	27827	17.2061	26.5891
2R	scaffold116.1	29698	30945	21.1447	16.9739
2R	scaffold116.1	33235	45020	27.1843	24.6144
2R	scaffold116.1	54305	59788	8.23512	8.36745
2R	scaffold116.1	61321	62259	33.5342	21.6542
2R	scaffold116.1	67089	67827	7.93696	7.60053
2R	scaffold116.1	77440	90547	157.894	205.963
2R	scaffold1163.1	8159	10242	7.37071	7.29778
2R	scaffold1163.1	10698	11745	18.3745	14.7197
2R	scaffold1163.1	13655	14453	10.8397	8.25832
2R	scaffold1163.1	15065	19442	18.0792	17.6316
2R	scaffold1165.1	26	1283	12.5008	12.4185
2R	scaffold1165.1	2143	6520	7.39476	9.44245
2R	scaffold1165.1	3622	9971	9.17911	8.22877
2R	scaffold1165.1	13427	14636	41.1831	23.8007
2L	scaffold1166.1	246	10437	28.4047	21.7349
2L	scaffold1166.1	10883	11709	871.229	873.554
2L	scaffold1166.1	12468	13144	13.0365	16.2743
2L	scaffold1166.1	13830	14801	12.5803	10.5656
2L	scaffold1166.1	17111	21240	70.284	106.434
X	scaffold1167.1	17390	19427	8.46513	6.70509
X	scaffold1167.1	20066	21556	15.783	10.6115
X	scaffold1167.1	21628	24809	15.6024	13.5283
2R	scaffold1168.1	28243	29805	10.4084	7.38923
2R	scaffold1168.1	30130	31714	17.7707	20.0342
2R	scaffold1168.1	32488	35773	22.3091	20.2546
3R	scaffold1169.1	1	694	124.175	144.264
3R	scaffold1169.1	1427	4414	20.8054	19.0373
3R	scaffold1169.1	7504	9151	7.44567	7.20845
3R	scaffold1169.1	9222	10186	14.0175	17.0406
3R	scaffold1169.1	19566	21407	97.5932	128.515
3L	scaffold1170.1	10919	12772	10.9852	9.90348
3L	scaffold1170.1	13288	15005	8.22072	6.29278
2L	scaffold1171.1	6738	8743	16.1783	69.8911
2L	scaffold1171.1	31510	32076	7.0314	6.11506
2R	scaffold1172.1	650	2415	16.8669	14.117
2R	scaffold1172.1	2791	4347	11.3508	10.7658
3L	scaffold1173.1	3250	7622	25.377	33.6617
3L	scaffold1173.1	9959	12130	17.8231	17.1617
3L	scaffold1173.1	19343	20385	41.8811	27.2097
3L	scaffold1173.1	20438	26747	114.752	104.778
3L	scaffold1173.1	12959	18386	72.3445	51.4091
X	scaffold1174.1	497	4626	17.041	21.626
X	scaffold1174.1	7817	12576	24.7678	26.2445
X	scaffold1174.1	16219	21212	45.6981	42.6728
X	scaffold1175.1	19148	22282	21.9977	18.1925
X	scaffold1175.1	11765	18549	10.4008	9.66415
3L	scaffold1176.1	291	1731	262.897	277.404
3L	scaffold1176.1	5043	12440	25.8099	27.8709
3L	scaffold1176.1	14719	16195	15.4289	15.9242
3L	scaffold1177.1	37614	43472	9.99361	11.4111
3L	scaffold1177.1	32162	33198	11.3925	15.4388
2L	scaffold1178.1	41581	44121	14.2264	10.4443
2L	scaffold1178.1	44448	44996	7.62146	3.93964
2L	scaffold1178.1	46904	48512	22.9286	15.6537
2L	scaffold1179.1	4598	5808	7.6224	7.54651
2L	scaffold1179.1	6335	8554	26.968	24.566
2L	scaffold1179.1	8745	9936	12.9771	14.7247
2L	scaffold1179.1	10627	12646	35.9981	32.198
2L	scaffold1179.1	14817	20831	19.7609	17.6636
2R	scaffold1180.1	24203	25930	140.041	131.631
3R	scaffold118.1	6200	6816	7.6255	6.64418
3R	scaffold118.1	44289	45941	60.3363	73.6295
3R	scaffold118.1	56409	57851	41.9049	36.9791
3R	scaffold118.1	57910	59557	59.6073	61.1554
3R	scaffold118.1	60624	61140	33.6887	38.4366
3R	scaffold118.1	62268	64835	45.6993	41.9188
3R	scaffold118.1	7844	43275	41.2521	46.7539
2L	scaffold1181.1	1	727	63.2594	47.3629
2L	scaffold1181.1	5625	7083	31.9605	29.4764
2L	scaffold1181.1	12098	13967	13.3199	16.7575
2L	scaffold1181.1	22380	23362	14.9455	8.43241
2L	scaffold1181.1	14039	21691	15.4454	16.4447
X	scaffold1183.1	10043	25537	15.8769	15.6991
X	scaffold1190.1	15255	15842	7.92302	9.32035
X	scaffold1190.1	17900	19980	9.33353	8.37547
3L	scaffold119.1	15270	16074	14.0811	12.1795
3L	scaffold119.1	17334	22712	60.1585	61.621
3L	scaffold119.1	22768	23739	78.7192	100.776
3L	scaffold119.1	25682	26933	7.03419	6.77457
3L	scaffold119.1	27468	29217	17.3176	17.9107
3L	scaffold119.1	30899	32158	41.4234	37.7201
3L	scaffold119.1	33125	35264	11.2617	11.0693
3L	scaffold119.1	35827	39029	31.3779	34.1078
3L	scaffold119.1	39327	39832	13.9018	10.8242
3L	scaffold119.1	40229	40857	15.1715	13.8231
3L	scaffold119.1	71649	72580	10.7032	9.42906
3L	scaffold119.1	84064	96790	9.78054	9.52307
3L	scaffold119.1	102540	104802	26.9316	21.8488
3L	scaffold119.1	104882	113210	27.9656	26.5082
3L	scaffold119.1	97367	101240	18.0635	17.4834
2L	scaffold1191.1	17620	18393	10.7775	12.3899
2L	scaffold1191.1	20178	24660	1223.36	1065.28
2L	scaffold1191.1	25812	29058	16.7256	21.1648
2L	scaffold1191.1	29479	30135	10.1154	7.08378
3L	scaffold1192.1	3463	7354	23.5532	20.1458
3L	scaffold1192.1	7412	8210	31.2244	35.0198
3L	scaffold1192.1	8442	10112	15.4255	16.3185
3L	scaffold1192.1	10307	12681	14.8895	6.4658
3L	scaffold1192.1	11792	14101	13.668	20.1707
3L	scaffold1192.1	20159	22208	13.7545	15.6241
3L	scaffold1192.1	22574	23725	10.4904	10.5168
3L	scaffold1192.1	24299	25539	13.9546	16.3076
3L	scaffold1192.1	26141	29123	13.4429	13.8022
3L	scaffold1192.1	29012	30531	34.249	41.9722
3L	scaffold1192.1	30925	31745	31.1175	31.9941
3L	scaffold1192.1	38580	39850	51.6003	45.1782
3L	scaffold1192.1	61504	62384	12.9401	13.0266
2R	scaffold1193.1	9123	10311	23.733	27.4377
2R	scaffold1193.1	10529	12258	39.7294	36.8298
2R	scaffold1193.1	12486	14830	25.2036	19.0432
X	scaffold1196.1	619	1751	57.4458	95.2103
X	scaffold1196.1	2697	4776	16.2001	11.7855
X	scaffold1196.1	3269	3994	190.358	147.093
X	scaffold1196.1	5064	8394	23.159	27.2194
X	scaffold1196.1	9300	10453	21.9021	18.5167
X	scaffold1196.1	10727	13961	54.152	43.9145
X	scaffold1196.1	17139	20013	26.8007	22.9632
X	scaffold1196.1	14369	16816	16.8147	17.5281
X	scaffold1196.1	28725	34126	16.141	23.9981
3L	scaffold1198.1	1070	7302	26.8289	26.2193
3L	scaffold1198.1	11132	15628	9.15595	8.25796
X	scaffold1199.1	13841	21877	17.293	20.4119
X	scaffold1200.1	7305	9952	11.8107	11.9755
X	scaffold1200.1	12904	14543	17.2128	18.5403
X	scaffold1200.1	19923	21834	60.8516	33.863
X	scaffold1200.1	38823	43619	44.9057	38.8375
X	scaffold1200.1	43843	46099	50.8519	45.716
X	scaffold1200.1	30649	36378	182.419	80.8581
X	scaffold1201.1	2413	3332	7.35992	8.31147
X	scaffold1201.1	16525	18039	12.7597	11.7264
X	scaffold1201.1	18185	20977	16.5507	23.981
X	scaffold1201.1	22463	23443	21.0279	22.6751
X	scaffold1201.1	23724	25740	10.8956	10.5698
3L	scaffold1202.1	144	2196	10.8247	15.4355
X	scaffold1204.1	1	3343	26.3821	27.0379
X	scaffold1204.1	3410	5546	17.7975	13.5135
X	scaffold1204.1	5990	13472	19.5053	21.3506
X	scaffold1204.1	16195	17865	23.2619	18.6587
2L	scaffold1205.1	16784	19418	11.3755	13.1724
2L	scaffold1207.1	13529	14050	30.5958	23.847
2L	scaffold1207.1	38587	41060	26.1808	24.528
2L	scaffold1207.1	28113	32876	30.1768	43.1943
2L	scaffold1209.1	1767	2702	102.768	97.051
2L	scaffold1209.1	3755	6566	87.1423	102.442
3L	scaffold12.1	87186	88366	21.6318	18.4001
3L	scaffold12.1	89630	90680	9.69701	7.09616
3L	scaffold12.1	91086	93666	17.5481	14.4785
3L	scaffold12.1	93930	95036	674.893	667.91
3L	scaffold12.1	97040	97994	140.423	119.736
3L	scaffold12.1	106055	108207	22.1389	17.0467
3L	scaffold12.1	108262	110538	30.7698	22.7949
3L	scaffold12.1	121780	122827	8.39783	9.44904
3L	scaffold12.1	151747	152647	10.9922	4.80103
3L	scaffold12.1	152735	154940	9.66684	6.52698
3L	scaffold12.1	110682	120189	14.958	23.7937
3L	scaffold12.1	127471	131341	13.075	11.7816
2L	scaffold121.1	4974	13738	282.778	251.949
2L	scaffold121.1	54335	56891	138.28	120.408
2L	scaffold121.1	72060	77481	116.887	95.7276
2L	scaffold121.1	88947	90875	7.58784	6.1668
2L	scaffold121.1	48321	53775	113.997	84.0785
2L	scaffold121.1	57684	69212	37.8732	38.7553
2L	scaffold121.1	78253	88091	97.5002	95.7174
2L	scaffold1211.1	23477	25183	24.5557	18.2793
2R	scaffold1213.1	3455	10101	9.01891	10.4993
2R	scaffold1213.1	26141	34183	63.9363	60.8081
2R	scaffold1214.1	5181	10333	520.818	411.029
2R	scaffold1214.1	11644	13541	11.2612	12.7719
2R	scaffold1214.1	14011	15611	13.9197	12.7943
2R	scaffold1214.1	18875	22979	7.62386	8.41783
3L	scaffold1215.1	9690	13529	26.0141	25.0197
3L	scaffold1215.1	15274	16578	18.4434	15.752
X	scaffold1216.1	12970	13529	24.4401	41.439
X	scaffold1216.1	18608	21569	16.5045	18.5007
X	scaffold1216.1	21715	22748	16.2311	21.1974
X	scaffold1216.1	14075	17022	12.0652	12.185
2R	scaffold1217.1	394	2073	85.1256	73.6609
2R	scaffold1217.1	20011	20917	60.3841	38.0011
2R	scaffold1217.1	23935	26601	51.8546	54.2241
2R	scaffold1217.1	11004	18843	160.699	116.712
2R	scaffold1217.1	30189	36568	45.5912	37.8673
2R	scaffold1218.1	3716	5407	10.1297	8.31073
3L	scaffold1219.1	3123	7800	56.0011	76.7402
3L	scaffold1219.1	8330	11246	19.6062	23.2045
3L	scaffold1219.1	12880	16411	14.4858	34.8665
2L	scaffold1220.1	569	18766	9.7159	10.5423
X	scaffold122.1	6345	9192	13.0063	8.56292
X	scaffold122.1	35520	38493	88.372	85.724
X	scaffold122.1	38868	39696	1163.27	1148.05
X	scaffold122.1	39755	40444	11.7557	7.44039
X	scaffold122.1	40983	42084	15.2065	12.7144
X	scaffold122.1	60441	61403	7.08216	6.69643
X	scaffold122.1	83228	87425	13.1313	12.4154
X	scaffold122.1	100601	105163	24.6404	21.8452
X	scaffold122.1	106765	112764	76.1562	79.6652
3R	scaffold1221.1	3443	4659	46.0091	42.7733
3R	scaffold1221.1	4910	9303	81.4191	84.0791
3R	scaffold1221.1	20293	21228	20.0615	15.2633
3R	scaffold1221.1	21310	22134	17.5967	22.1361
3R	scaffold1221.1	22384	25463	26.9507	25.0526
3R	scaffold1221.1	25992	26502	17.9599	8.39359
3R	scaffold1221.1	15479	16972	269.962	256.912
3R	scaffold1222.1	2223	7272	9.87072	10.088
X	scaffold1223.1	661	5332	84.9639	72.9571
3R	scaffold1224.1	1	15414	33.4169	33.3861
3R	scaffold1224.1	27839	28881	33.5119	35.6321
3R	scaffold1224.1	15476	16907	57.3453	64.5438
3R	scaffold1225.1	2451	12720	13.068	15.9947
3R	scaffold1225.1	16475	17534	20.0088	33.2881
3R	scaffold1225.1	19160	21725	16.1947	11.8235
3R	scaffold1225.1	21789	22409	8.53056	7.49585
3R	scaffold1225.1	25292	26697	18.5733	19.2547
3L	scaffold1229.1	37	8594	14.0064	15.6135
3L	scaffold1229.1	8938	9911	9.66181	10.5248
3L	scaffold1229.1	9976	12463	9.35068	5.72419
X	scaffold1231.1	4541	9317	19.3147	19.3937
2R	scaffold1233.1	6189	13304	36.8008	40.2303
2R	scaffold1233.1	13459	14638	88.8282	78.8033
2R	scaffold1233.1	18429	21467	117.252	108.198
2R	scaffold1233.1	23233	23824	10.9128	10.522
2L	scaffold1234.1	105	848	7.80084	6.25245
2L	scaffold1234.1	6561	7257	531.218	571.917
2L	scaffold1234.1	7618	10692	210.793	174.443
2L	scaffold1234.1	9846	12538	25.1051	20.754
2L	scaffold1234.1	12597	13439	15.808	14.7593
2L	scaffold1234.1	14334	15188	14.3369	9.46864
2L	scaffold1234.1	17354	22566	14.2824	14.146
2L	scaffold1236.1	1056	1866	30.1583	29.496
2L	scaffold1236.1	11688	12201	15.7743	16.7345
3R	scaffold1237.1	670	3436	73.303	47.9244
3R	scaffold1237.1	4210	6374	108.953	111.05
3R	scaffold1237.1	6583	8240	51.4856	37.054
3R	scaffold1237.1	8693	10384	16.4432	17.7593
3R	scaffold1237.1	10444	11430	16.2239	16.6273
3R	scaffold1237.1	11490	13277	12.4711	14.5737
3R	scaffold1237.1	13555	14315	12.737	13.3734
2R	scaffold1239.1	570	2353	17.2378	17.3091
2R	scaffold1239.1	2748	8975	25.437	20.7884
2R	scaffold1239.1	22061	22904	67.2773	30.6483
2R	scaffold1239.1	23569	24817	45.22	39.5814
2R	scaffold1239.1	29590	30795	13.0786	9.88172
2R	scaffold1239.1	30854	35335	19.2696	17.4586
3R	scaffold1240.1	171	2937	30.6359	30.8359
3R	scaffold1240.1	3306	8824	47.7158	47.4727
3R	scaffold1240.1	8877	9494	34.0202	28.8436
3R	scaffold1240.1	20508	21363	7.50899	4.19952
3R	scaffold1240.1	12436	18387	13.0188	15.1181
2L	scaffold124.1	45587	46521	8.10673	14.7289
2L	scaffold124.1	47008	47650	8.27146	14.1976
2L	scaffold124.1	54121	54985	391.525	321.353
2L	scaffold124.1	56891	58487	25.3983	34.4478
2L	scaffold124.1	92053	94671	39.2677	40.1694
2L	scaffold124.1	94047	95235	120.443	102.918
2L	scaffold124.1	96362	98145	8.65291	8.7454
2L	scaffold124.1	48477	50723	7.22815	11.589
2L	scaffold124.1	63716	78063	44.1016	45.0734
2L	scaffold124.1	78712	88880	70.1607	62.5958
2L	scaffold124.1	98030	99529	171.986	165.793
3L	scaffold1241.1	7938	12201	18.9894	21.278
3L	scaffold1241.1	19370	20032	10.878	13.6261
3L	scaffold1241.1	21731	24367	26.3059	21.4463
3L	scaffold1241.1	24692	26577	142.248	128.791
3L	scaffold1241.1	26942	30654	192.124	206.515
3L	scaffold1241.1	31133	32374	28.1381	27.965
3L	scaffold1241.1	32438	33280	129.682	96.2627
2L	scaffold1243.1	24347	25754	11.8064	7.50811
2L	scaffold1243.1	26162	28998	12.5361	2.424
2L	scaffold1244.1	24204	25076	54.9738	30.359
2L	scaffold1244.1	28168	28999	204.205	105.224
X	scaffold1246.1	20035	20953	16.2957	13.147
3R	scaffold1247.1	1561	5957	12.9289	11.5908
3R	scaffold1248.1	2114	2697	217.798	181.24
3R	scaffold1248.1	3003	4628	29.3416	27.888
3R	scaffold1248.1	6637	7560	559.104	561.331
3R	scaffold1248.1	11010	15939	807.316	609.009
3R	scaffold1248.1	18594	25425	26.0182	23.2229
3R	scaffold1248.1	16047	17104	1089.11	801.45
3R	scaffold1249.1	4990	5526	7.50763	14.1403
3R	scaffold1249.1	14560	15235	10.4119	4.10555
X	scaffold1251.1	533	16186	39.9887	37.7088
2L	scaffold1254.1	2721	3458	7.07707	4.81538
2L	scaffold1254.1	3555	7903	7.79875	8.89923
2L	scaffold1254.1	9128	11559	10.4902	11.0042
2L	scaffold1254.1	11615	14477	16.4694	17.999
2L	scaffold1254.1	17302	19388	18.2683	13.5097
2R	scaffold1256.1	834	1695	13.7648	16.7455
2R	scaffold1256.1	5651	6433	10.6661	10.1439
2R	scaffold1256.1	6975	9495	13.0885	10.9071
2R	scaffold1256.1	10094	11135	1303.76	972.038
2R	scaffold1256.1	12394	21754	11.7412	13.205
X	scaffold1257.1	9	4442	43.4645	35.9701
X	scaffold1257.1	5843	6712	11.2269	12.5751
X	scaffold1257.1	10663	11781	8.83476	5.08936
X	scaffold1257.1	13851	15037	7.11016	7.56323
2R	scaffold1258.1	21335	24923	274.157	297.356
2L	scaffold1259.1	11444	12389	72.3697	61.5397
2L	scaffold1259.1	21035	21870	21.2826	19.141
2L	scaffold1259.1	12488	18923	44.4021	45.2815
3L	scaffold126.1	7404	11849	20.0644	15.1713
3L	scaffold126.1	33037	42886	22.2557	22.063
3L	scaffold126.1	45468	46073	24.5114	9.87812
X	scaffold1261.1	2214	10735	22.3075	19.7425
X	scaffold1261.1	11556	12242	49.2519	25.0845
X	scaffold1263.1	1	15490	50.9578	57.4902
X	scaffold1263.1	17438	18972	17.0783	12.2456
X	scaffold1263.1	19230	21135	13.2796	11.5991
3R	scaffold1266.1	21585	25560	11.347	9.77757
2L	scaffold1267.1	6035	10495	49.3417	53.2672
2L	scaffold1267.1	11733	12934	59.5781	66.9122
2L	scaffold1267.1	13594	16363	14.7408	11.7332
2L	scaffold1267.1	18039	18815	1629.81	1401.42
3R	scaffold1268.1	788	1466	42.8679	25.788
3R	scaffold1268.1	1532	4469	25.826	14.1332
3R	scaffold1268.1	4952	5657	17.2252	11.7624
3R	scaffold1268.1	6031	7726	14.8806	8.13118
3R	scaffold1268.1	16825	18181	50.4736	70.2048
3R	scaffold1268.1	17196	18460	51.545	30.0459
3R	scaffold1268.1	19211	24315	13.7925	14.7694
X	scaffold1270.1	10741	16266	12.0792	12.5044
X	scaffold1270.1	31956	32501	11.345	15.9975
3L	scaffold127.1	18329	19195	8.98365	8.44728
3L	scaffold127.1	20069	24315	49.38	48.6795
3L	scaffold127.1	25013	30610	302.152	320.484
3L	scaffold127.1	30705	31648	19.6578	22.3289
3L	scaffold127.1	33493	34066	7.18796	3.55495
3L	scaffold127.1	44295	45836	144.943	345.448
3L	scaffold127.1	47291	48379	11.8722	14.8489
3L	scaffold127.1	48450	49070	27.2103	27.3393
3L	scaffold127.1	53454	54049	13.0967	25.5256
3L	scaffold127.1	31708	32844	22.8746	19.687
2L	scaffold1271.1	10956	14576	321.024	331.814
2L	scaffold1271.1	14679	15446	34.6887	58.8327
2L	scaffold1271.1	19553	21014	8.60762	13.9212
2L	scaffold1272.1	1110	4024	13.4095	9.92325
3L	scaffold1273.1	2780	3563	24.4888	23.7371
3L	scaffold1273.1	3638	10190	21.6794	22.7002
3L	scaffold1273.1	25088	25607	51.7706	50.1746
3L	scaffold1273.1	13104	24615	127.451	108.93
3L	scaffold1273.1	31771	32842	183.496	291.722
3L	scaffold1274.1	333	1076	13.2268	10.0155
3L	scaffold1274.1	3801	4454	113.219	118.595
3L	scaffold1274.1	5882	6743	98.2614	126.027
3L	scaffold1274.1	11387	12364	7.16248	7.62463
2L	scaffold1278.1	79	5529	22.6644	28.2173
2L	scaffold1278.1	7734	10168	21.6327	17.9317
X	scaffold1279.1	8968	9596	7.5312	9.19422
X	scaffold1279.1	17911	22762	8.47245	9.30737
X	scaffold1279.1	22868	23608	7.80621	3.34201
X	scaffold1280.1	6581	7947	26.6179	32.7379
X	scaffold1280.1	8567	9199	30.4697	26.5204
X	scaffold1280.1	19337	19853	7.03721	7.00896
X	scaffold128.1	3361	4506	10.7158	10.9319
X	scaffold128.1	5317	6568	7.99441	11.7791
X	scaffold128.1	23397	26357	56.4908	15.0355
3L	scaffold1281.1	11458	16170	95.5219	123.637
3L	scaffold1281.1	18781	23186	25.8555	32.6722
3L	scaffold1281.1	23252	24397	16.5167	16.5521
3L	scaffold1281.1	26438	32251	80.619	81.5717
3L	scaffold1281.1	30067	32473	125.793	100.145
3L	scaffold1281.1	32772	35452	95.3943	70.3633
3L	scaffold1281.1	35871	39531	89.1842	86.9202
3L	scaffold1283.1	4576	18545	69.1337	62.0527
3R	scaffold1285.1	4161	5061	9.16357	7.34927
3R	scaffold1285.1	5125	6022	8.90138	9.24874
3R	scaffold1285.1	6696	7765	12.3535	14.9311
3R	scaffold1285.1	8337	11928	11.3621	6.85595
3R	scaffold1285.1	14648	15449	150.473	145.509
3R	scaffold1285.1	18281	19714	210.756	135.96
3R	scaffold1285.1	20582	21260	79.5405	45.7268
3R	scaffold1285.1	21122	21701	17.5827	17.4112
3R	scaffold1285.1	22285	27962	429.659	437.505
3R	scaffold1285.1	28259	28975	9.80737	9.8188
3R	scaffold1285.1	29766	30400	10.0609	5.50611
3R	scaffold1285.1	29766	31731	7.45522	5.934
2L	scaffold1286.1	881	3461	7.4473	6.62531
2L	scaffold1286.1	7664	13185	27.4786	20.9024
2L	scaffold1286.1	35666	37083	660.813	614.422
2L	scaffold1286.1	42840	43656	7.21005	2.61474
2L	scaffold1287.1	38286	39812	11.5124	11.0458
2L	scaffold1287.1	40919	44100	16.3348	19.7478
2L	scaffold1287.1	44201	45744	12.5414	15.3419
2L	scaffold1287.1	30711	37340	16.3102	22.4085
2L	scaffold1290.1	1690	7531	21.6014	20.4115
2L	scaffold1290.1	8624	12036	88.4954	140.902
2L	scaffold1290.1	12817	15543	32.1612	27.1476
2L	scaffold1290.1	26165	29046	19.0406	8.52762
2L	scaffold1290.1	22213	25034	24.161	9.16118
2L	scaffold1290.1	35988	36812	41.4159	51.7823
2L	scaffold1290.1	39823	40696	348.602	318.836
3L	scaffold129.1	9	1686	10.8125	9.80818
3L	scaffold129.1	11795	12962	36.607	57.6071
3L	scaffold129.1	17096	20526	13.0561	13.6862
3L	scaffold129.1	22225	24858	31.8379	18.294
3L	scaffold129.1	33662	38506	15.3988	11.7791
3L	scaffold129.1	38679	44697	18.805	12.7833
3L	scaffold129.1	51861	58274	20.2735	15.1137
3L	scaffold129.1	59764	60736	10.3992	6.80204
3L	scaffold129.1	62151	64193	7.14566	5.63989
3L	scaffold129.1	78724	80401	62.3186	45.1326
3L	scaffold129.1	14169	17021	25.5774	33.1815
3L	scaffold129.1	45567	49347	52.8659	52.0048
3L	scaffold129.1	65069	69714	8.56836	6.44513
3L	scaffold129.1	81864	84887	362.152	288.223
3L	scaffold129.1	88894	109222	106.656	99.8532
3R	scaffold1292.1	20	6445	10.603	8.37253
3R	scaffold1292.1	8161	12167	17.1591	13.525
3R	scaffold1292.1	12242	13015	19.0317	20.0509
3L	scaffold1293.1	482	1048	32.1647	40.3582
3L	scaffold1293.1	9194	9946	14.4596	11.6793
3L	scaffold1293.1	10704	13131	22.8749	18.9698
3L	scaffold1293.1	13295	15521	13.9994	13.7042
3L	scaffold1293.1	16962	18281	32.1718	22.7732
3L	scaffold1293.1	16096	16882	15.9362	10.3781
3R	scaffold1294.1	1145	3049	51.1189	36.6549
3R	scaffold1294.1	4290	7051	935.255	727.584
3R	scaffold1294.1	11609	14934	9.45002	10.8181
3R	scaffold1294.1	18728	21074	33.3545	35.9431
3R	scaffold1296.1	3879	5302	72.769	89.6188
X	scaffold1298.1	2179	4901	67.6258	72.1355
X	scaffold1298.1	8867	9943	208.885	232.442
2L	scaffold1301.1	15971	17224	57.7833	52.857
3L	scaffold1303.1	6448	8458	87.2983	63.2817
3L	scaffold1303.1	11058	12720	50.0926	54.819
3L	scaffold1303.1	14048	16106	30.7815	31.1759
3L	scaffold1303.1	17385	18140	19.6277	20.0089
2R	scaffold1305.1	23294	26297	10.2953	11.8788
2R	scaffold1307.1	1051	2382	75.9076	86.4794
2R	scaffold1307.1	3303	4701	81.8702	80.7055
2R	scaffold1307.1	6072	7813	11.1066	7.84715
2R	scaffold1307.1	9649	10548	17.2354	21.5103
2R	scaffold1307.1	11874	13216	10.9393	12.9928
2R	scaffold1307.1	16804	19990	53.7667	47.7599
2R	scaffold1307.1	20886	24548	37.14	42.2205
2R	scaffold1307.1	24670	26291	141.515	105.792
2R	scaffold1307.1	27971	28987	10.1236	9.53058
2R	scaffold1307.1	35460	35990	19.4214	10.5527
2R	scaffold1307.1	15491	16532	7.20942	7.35353
3L	scaffold1308.1	41014	43889	11.6345	12.0552
3L	scaffold1308.1	45702	47249	7.19373	6.40992
4	scaffold13.1	445	5230	10.8475	11.1811
4	scaffold13.1	6547	11061	23.3596	22.7979
4	scaffold13.1	11281	12748	7.16881	5.89025
4	scaffold13.1	33774	37637	7.91001	4.49312
4	scaffold13.1	67496	68485	13.9661	13.5452
4	scaffold13.1	69405	70055	8.23789	10.146
4	scaffold13.1	70236	77239	13.7118	14.2866
4	scaffold13.1	83121	96331	14.9195	17.6541
4	scaffold13.1	119890	123418	24.2974	26.1116
4	scaffold13.1	124540	127084	27.309	29.763
4	scaffold13.1	13402	16512	11.321	10.2805
4	scaffold13.1	41601	55508	12.1954	10.868
4	scaffold13.1	61991	67420	12.8091	12.4148
4	scaffold13.1	97814	109882	23.4389	24.6367
4	scaffold13.1	109935	115930	45.5706	54.1523
4	scaffold13.1	128534	137602	30.3603	32.9233
2L	scaffold1310.1	32900	34023	18.0619	13.0803
2L	scaffold1310.1	34120	45591	21.1615	21.4432
2L	scaffold1310.1	10704	29132	676.621	674.449
X	scaffold131.1	5073	11823	38.5151	53.3372
3L	scaffold1313.1	18963	20575	22.4261	26.622
3L	scaffold1313.1	23498	24129	7.93402	8.66093
3L	scaffold1313.1	13954	18893	21.0585	26.7222
3R	scaffold1314.1	902	2950	27.9221	16.8307
3R	scaffold1314.1	18353	20673	54.4284	57.2674
3R	scaffold1314.1	3236	17429	38.0821	34.5599
X	scaffold1315.1	1	2164	17.3295	16.9566
X	scaffold1315.1	7405	10934	801.302	901.997
3L	scaffold1318.1	4011	7252	34.2222	36.368
3L	scaffold1318.1	11693	12358	14.5304	26.8697
3L	scaffold1318.1	12618	15672	28.6501	28.1343
3L	scaffold1318.1	21788	22547	10.1434	5.2891
3L	scaffold1318.1	15689	21732	18.1113	20.5252
3R	scaffold1319.1	16739	19619	8.05925	15.0032
3R	scaffold1319.1	21077	21996	316.423	256.488
3R	scaffold1319.1	23118	26855	12.49	8.18778
3R	scaffold1320.1	17102	17837	7.71635	5.07712
3L	scaffold132.1	3635	11410	9.29168	13.0473
3L	scaffold132.1	21622	22962	981.818	777.887
3L	scaffold132.1	26272	27964	291.01	226.428
3L	scaffold132.1	46385	53023	34.2103	38.3691
X	scaffold1321.1	19207	19813	8.27924	6.85231
X	scaffold1321.1	15955	18349	28.5948	16.5144
2R	scaffold1324.1	16791	23083	19.4954	23.3671
3L	scaffold1328.1	7208	9144	8.26008	21.5568
3L	scaffold1328.1	27245	29499	10.6706	8.53907
3L	scaffold1328.1	37976	39797	13.779	18.1391
3L	scaffold1328.1	31815	35297	44.5734	44.6512
3R	scaffold1329.1	377	1622	23.8158	20.2137
3R	scaffold1329.1	2511	3292	14.8994	7.62819
3R	scaffold1329.1	6270	7694	8.91294	8.22881
3R	scaffold1329.1	9127	20502	36.7839	35.0583
X	scaffold1330.1	4973	6648	12.6021	13.764
X	scaffold1330.1	8131	8966	10.2444	14.6632
X	scaffold1330.1	12502	18554	13.2812	18.9723
3L	scaffold133.1	17685	19337	12.0402	8.35382
3L	scaffold133.1	19630	30712	34.8717	44.6403
3L	scaffold133.1	31182	31727	8.18893	19.1483
3L	scaffold133.1	14169	16478	110.104	164.271
3L	scaffold133.1	32757	41664	31.784	34.3177
3R	scaffold1334.1	545	1379	11.6779	11.8399
3R	scaffold1334.1	9674	14136	42.0799	36.9641
3R	scaffold1334.1	16612	17197	14.3307	10.2039
3R	scaffold1334.1	34910	36141	295.616	319.949
3R	scaffold1336.1	1749	3537	84.9999	65.5899
3R	scaffold1336.1	18113	18949	14.847	9.382
3R	scaffold1336.1	4018	17822	25.0019	33.297
X	scaffold1337.1	2013	3396	9.31959	5.2605
X	scaffold1337.1	4143	6731	9.35047	7.82944
X	scaffold1337.1	6885	7475	13.937	10.6468
X	scaffold1337.1	13623	15315	41.6633	37.8986
X	scaffold1337.1	18714	19447	30.5013	37.4954
X	scaffold1337.1	15578	18461	7.94193	6.85572
2R	scaffold1338.1	4	819	68.0202	57.6805
2R	scaffold1338.1	2089	2745	7.67133	6.44493
2R	scaffold1338.1	7195	13107	24.2235	23.7385
2R	scaffold1338.1	13169	13927	15.5651	14.1174
2L	scaffold1339.1	110	1713	8.36337	7.9358
2L	scaffold1339.1	2235	3152	15.3019	2.26546
2L	scaffold1339.1	4169	9060	17.3086	16.2083
2L	scaffold1339.1	10072	10614	9.14679	7.64769
2L	scaffold1339.1	10950	11967	16.9935	15.3113
2L	scaffold1339.1	12137	13690	10.1713	13.0552
3L	scaffold134.1	5206	5867	10.5159	7.25311
3L	scaffold134.1	19034	20026	8.30753	6.02499
3L	scaffold134.1	20831	22348	38.4657	45.6142
3L	scaffold134.1	22414	23576	34.2845	29.3006
3L	scaffold134.1	25116	31019	21.0738	28.037
3L	scaffold134.1	34408	37833	32.9641	37.8421
3L	scaffold134.1	38212	39057	223.488	246.983
3L	scaffold134.1	38932	40063	23.8078	27.1115
3L	scaffold134.1	41938	44359	10.1412	8.29535
3L	scaffold134.1	52876	54741	21.3249	26.5088
3L	scaffold134.1	55937	58384	55.2822	68.8668
3L	scaffold134.1	31138	33201	160.866	138.378
3L	scaffold134.1	48733	52810	18.9039	13.2274
3R	scaffold1341.1	4452	5285	9.21995	16.4938
3R	scaffold1341.1	6320	13571	60.1597	79.8397
3R	scaffold1341.1	13848	14720	16.0014	12.4447
2R	scaffold1342.1	5135	8182	30.8592	36.0624
X	scaffold1343.1	2575	5353	21.0002	21.0072
X	scaffold1343.1	7419	9878	90.6838	59.8543
X	scaffold1343.1	20336	21750	17.9558	15.4428
X	scaffold1343.1	28275	29677	10.2969	11.8158
X	scaffold1344.1	19118	19966	15.9576	13.4005
X	scaffold1344.1	23282	24369	9.42564	9.02067
X	scaffold1344.1	26993	28269	12.1884	12.8257
X	scaffold1344.1	14532	17346	27.1417	51.5526
2L	scaffold1345.1	3352	4583	324.29	256.367
X	scaffold1348.1	1297	4450	100.945	118.137
X	scaffold1348.1	5258	6444	10.7673	13.565
X	scaffold1348.1	6969	8099	9.96278	10.7672
X	scaffold1348.1	8270	9882	20.2373	31.5401
X	scaffold1348.1	10898	15975	21.7319	27.227
X	scaffold1348.1	21048	21782	12.1125	7.34548
X	scaffold1348.1	23410	39347	23.1782	22.377
3L	scaffold1349.1	4625	6700	22.6093	17.9512
3L	scaffold1349.1	22539	24457	29.4452	33.6887
3L	scaffold1349.1	33774	40491	46.1794	52.8991
3L	scaffold1349.1	9150	17138	125.108	209.919
3L	scaffold1350.1	44753	47026	33.1548	30.4262
3L	scaffold1350.1	66026	66961	190.018	225.599
3L	scaffold1350.1	47288	59290	39.9334	43.6616
3L	scaffold1350.1	71301	90215	56.4977	41.603
2R	scaffold135.1	1291	3288	15.068	14.0076
2R	scaffold135.1	3675	5895	15.0518	15.9018
2R	scaffold135.1	6162	9463	32.3719	30.947
2R	scaffold135.1	11599	12729	21.3723	23.6515
2R	scaffold135.1	11906	12970	27.6909	27.4424
2R	scaffold135.1	14903	15846	46.1514	27.2915
2R	scaffold135.1	21936	23376	26.6692	27.8968
2R	scaffold135.1	26201	28732	34.5046	40.1979
2R	scaffold135.1	26675	27686	2.93304	16.3306
2R	scaffold135.1	28021	30029	22.963	40.5355
2R	scaffold135.1	30273	31611	38.0764	31.3547
2R	scaffold135.1	39347	44157	27.0871	27.7784
2R	scaffold135.1	44777	48158	27.7595	24.8377
2R	scaffold135.1	16325	18111	183.795	147.94
2R	scaffold135.1	31989	39101	28.0131	25.073
2R	scaffold135.1	48554	52292	30.9583	35.9616
2R	scaffold135.1	70165	108022	22.4647	23.3674
3L	scaffold1353.1	8998	16224	13.6323	13.4599
3R	scaffold1356.1	33760	36703	8.32185	7.73851
3R	scaffold1356.1	32172	33135	10.8421	6.31555
2L	scaffold1357.1	555	3118	15.6944	12.5503
2L	scaffold1357.1	4710	11611	72.2769	60.8228
2L	scaffold1357.1	11687	25955	44.6933	36.289
2R	scaffold1358.1	2431	8818	99.1528	106.394
3R	scaffold1359.1	7691	12760	33.5074	25.5212
3R	scaffold1359.1	12826	13623	32.0348	19.8098
3R	scaffold1359.1	18077	28668	19.3967	24.7966
2R	scaffold136.1	118	4582	28.5584	27.0776
2R	scaffold136.1	6667	8211	39.9713	33.3619
2R	scaffold136.1	8436	10024	30.403	29.7888
2R	scaffold136.1	10097	12968	49.8462	54.5458
2R	scaffold136.1	15235	16286	25.0181	28.0613
2R	scaffold136.1	20188	22324	42.1231	41.8828
2R	scaffold136.1	23054	24101	11.0359	10.4809
2R	scaffold136.1	24199	27145	27.6296	26.2398
2R	scaffold136.1	26450	27342	268.712	279.101
2R	scaffold136.1	27520	28095	226.143	240.855
2R	scaffold136.1	34703	35881	13.0594	11.9496
2R	scaffold136.1	38232	41128	20.5987	19.357
2R	scaffold136.1	42268	44575	22.1934	19.913
2R	scaffold136.1	45004	45761	27.7	39.1689
2R	scaffold136.1	45835	47308	19.9622	16.7864
2R	scaffold136.1	49348	50166	28.4832	29.489
2R	scaffold136.1	50847	52372	1229.08	1191.72
2R	scaffold136.1	53795	54623	41.1131	28.7832
2R	scaffold136.1	55131	56181	8.03868	5.91478
2R	scaffold136.1	56635	57915	11.0877	12.0218
2R	scaffold136.1	82540	88960	28.5512	29.7873
2R	scaffold136.1	89023	94792	23.6218	20.3672
2R	scaffold136.1	95885	96659	10.7727	7.88186
2R	scaffold136.1	15908	19346	150.934	114.313
2R	scaffold136.1	30099	33279	7.08116	4.81183
2R	scaffold136.1	47411	49270	29.471	30.2285
2R	scaffold136.1	65221	70761	14.8103	17.9763
X	scaffold1361.1	2572	3653	7.08469	15.7825
X	scaffold1361.1	4529	5280	1581.94	1408.12
X	scaffold1361.1	6591	8452	47.4934	79.3368
X	scaffold1361.1	8641	9889	18.1163	15.7526
X	scaffold1361.1	10240	14725	20.5323	25.1421
X	scaffold1361.1	14851	16210	14.4547	15.0553
X	scaffold1361.1	18029	20326	33.152	31.5072
X	scaffold1362.1	3627	12038	32.8889	54.23
X	scaffold1362.1	13143	15612	23.4138	32.6654
2L	scaffold1363.1	105	8151	19.5398	18.9428
2L	scaffold1363.1	9357	17994	17.9221	20.9074
3R	scaffold1364.1	1962	2588	15.0636	10.5609
3R	scaffold1364.1	5550	7785	11.8195	11.2957
3R	scaffold1364.1	8263	12495	16.3679	16.6036
3R	scaffold1364.1	18893	20443	9.04548	12.3576
3R	scaffold1364.1	21003	22626	7.75356	6.77663
3R	scaffold1364.1	14902	16973	14.8227	15.1425
2R	scaffold1365.1	4462	5147	11.5805	14.6681
2R	scaffold1367.1	7384	8531	43.8792	66.908
2R	scaffold1367.1	14477	15726	1193.2	1488.76
2R	scaffold1367.1	18601	20461	53.0596	75.7289
3R	scaffold1368.1	11634	12277	8.76058	8.37921
3R	scaffold1368.1	13369	14893	33.9555	28.2415
3R	scaffold1368.1	15431	16064	13.3362	15.1101
3L	scaffold137.1	17932	19455	44.757	52.3459
3L	scaffold137.1	14951	16512	21.2223	19.3748
3R	scaffold1372.1	23491	24747	12.258	12.4973
3R	scaffold1372.1	28997	31141	63.6159	50.5597
3R	scaffold1372.1	944	21221	22.2502	21.5036
3R	scaffold1372.1	31859	34004	5.72251	19.1214
2R	scaffold1373.1	2099	3463	16.2189	33.7161
3R	scaffold1374.1	14824	15459	13.7459	5.25531
2R	scaffold1376.1	1027	6547	23.5189	28.1041
2R	scaffold1376.1	53622	56156	47.2617	41.1295
2R	scaffold1376.1	21968	33179	243.666	237.132
2R	scaffold1376.1	33303	53352	147.793	143.864
2L	scaffold1377.1	10	4009	18.3522	20.8157
2L	scaffold1377.1	4410	5906	12.185	8.39052
2L	scaffold1377.1	6023	10103	15.7971	12.7862
2L	scaffold1377.1	10612	14505	16.4295	14.7416
2L	scaffold1377.1	24026	26316	7.69343	6.13209
2L	scaffold1377.1	34355	43228	46.4069	29.4481
2L	scaffold1377.1	15137	16691	17.6863	20.6878
2R	scaffold1378.1	4485	11583	21.5695	18.7947
X	scaffold1379.1	43371	44251	9.75295	8.74362
X	scaffold1379.1	44586	45106	8.56844	5.88217
X	scaffold1379.1	11982	32653	214.747	101.103
2R	scaffold1380.1	9099	14846	85.3842	83.419
3L	scaffold138.1	5537	7654	44.9427	48.4152
3L	scaffold138.1	9930	14200	25.2635	24.8495
3L	scaffold138.1	16702	17757	14.8379	18.8274
3L	scaffold138.1	18122	21302	22.0893	25.0937
3L	scaffold138.1	23024	29868	42.3336	53.7746
3L	scaffold138.1	35330	37319	43.7573	43.896
3L	scaffold138.1	51651	54335	15.0912	17.8995
3L	scaffold138.1	28517	35129	34.8507	38.4816
3R	scaffold1382.1	3427	4302	8.55739	10.5577
3R	scaffold1382.1	6973	8129	11.4205	11.8596
3R	scaffold1382.1	9116	11575	9.96785	11.0407
3R	scaffold1382.1	13764	15030	16.5801	13.9862
3R	scaffold1382.1	16430	17015	19.1824	14.0935
3R	scaffold1382.1	18050	19165	64.3666	75.8338
X	scaffold1383.1	4	2102	22.5223	25.1862
X	scaffold1383.1	2451	4925	7.69329	8.89077
X	scaffold1383.1	25245	27042	7.04276	5.92691
X	scaffold1383.1	8785	21830	50.2421	69.7149
3R	scaffold1384.1	12069	13596	13.1364	11.2038
3R	scaffold1384.1	17236	17843	17.6027	15.9049
3R	scaffold1384.1	19564	23592	44.3762	21.204
3R	scaffold1384.1	24566	31983	28.0726	27.7051
3R	scaffold1384.1	32997	33826	16.8776	14.3643
3R	scaffold1384.1	36585	37826	13.4233	9.65949
3R	scaffold1384.1	37890	38565	22.7551	11.8661
3R	scaffold1384.1	42379	43109	8.06369	8.91029
3R	scaffold1384.1	43849	47525	14.8469	17.1381
3R	scaffold1384.1	55311	57943	37.0773	19.1388
3R	scaffold1384.1	48119	50315	9.32043	5.92446
X	scaffold1385.1	11659	12728	68.4232	62.3303
X	scaffold1385.1	21278	25628	121.139	132.624
X	scaffold1385.1	27365	28845	13.5564	14.8283
X	scaffold1385.1	13232	20953	287.574	228.074
X	scaffold1386.1	284	6753	53.0608	47.9227
X	scaffold1386.1	24130	27609	64.2563	28.6765
X	scaffold1386.1	30444	32676	543.933	424.045
3L	scaffold1387.1	10157	10762	8.58187	12.8389
3L	scaffold1387.1	11200	12460	18.7167	22.251
2R	scaffold1388.1	6006	6997	10.7837	13.516
2R	scaffold1388.1	8125	9153	10.4915	9.31307
2R	scaffold1388.1	10166	11187	12.5567	13.0038
2R	scaffold1388.1	24495	26096	37.1305	37.7302
2R	scaffold1388.1	12264	20844	10.1654	13.8642
2R	scaffold1388.1	29794	34930	65.8417	65.6317
2R	scaffold1389.1	2	6638	281.153	283.796
2R	scaffold1389.1	18079	22308	53.3	52.122
2R	scaffold1389.1	24052	26406	26.614	26.0415
2R	scaffold1389.1	26722	27380	24.0216	23.8438
2R	scaffold1389.1	30958	33907	76.5937	90.5121
2R	scaffold1390.1	28812	29546	20.4701	20.7335
2R	scaffold1390.1	36067	38106	18.1842	17.0462
2R	scaffold1390.1	1011	28429	37.5225	29.9697
2R	scaffold139.1	147	4545	11.439	10.5518
2R	scaffold139.1	20452	22981	13.7528	14.2889
2R	scaffold139.1	23049	24541	8.4294	4.90843
2R	scaffold139.1	37875	39249	37.5196	38.8262
2R	scaffold139.1	41025	43562	314.512	401.531
3R	scaffold1391.1	13375	14247	7.99016	9.03465
3R	scaffold1391.1	17577	19011	16.1778	14.7729
3R	scaffold1391.1	19293	25796	17.3335	15.1682
3R	scaffold1391.1	15891	17498	16.4141	10.4086
3R	scaffold1392.1	63632	64309	262.327	176.156
3R	scaffold1392.1	22867	61545	17.5745	28.3471
3R	scaffold1392.1	64737	67017	20.0188	17.8783
3R	scaffold1393.1	230	3781	8.85495	16.4688
3R	scaffold1393.1	5667	6652	7.4339	15.1114
3R	scaffold1393.1	6714	12375	11.0936	19.8903
X	scaffold1394.1	18517	21941	17.6871	18.4012
3R	scaffold1396.1	1722	10954	23.0026	22.1998
3R	scaffold1397.1	4885	6473	9.5594	14.7556
3R	scaffold1397.1	6529	7656	8.8133	8.47911
3R	scaffold1397.1	7756	10575	23.1831	25.7349
3R	scaffold1397.1	10791	12558	8.84144	6.5867
3R	scaffold1397.1	17966	20035	37.4642	37.3273
3R	scaffold1397.1	15475	17770	16.2087	13.0242
X	scaffold1399.1	251	1694	15.4625	6.62962
X	scaffold1399.1	2337	3730	22.4885	21.818
X	scaffold1399.1	5861	11807	12.0375	13.9865
X	scaffold1399.1	15610	16203	6.9993	7.73051
2L	scaffold140.1	5131	6058	58.4425	84.5891
2L	scaffold140.1	6855	10274	110.826	116.45
2L	scaffold140.1	10597	12298	162.535	184.546
2L	scaffold140.1	37961	40122	10.5235	7.07321
2L	scaffold140.1	45403	48180	15.2113	15.6515
2L	scaffold140.1	54075	54851	16.5083	15.0872
3R	scaffold1401.1	2896	4223	560.561	121.636
3R	scaffold1401.1	11700	12887	58.4303	57.0657
3R	scaffold1401.1	18939	21871	30.8097	33.9578
3R	scaffold1401.1	13476	18872	39.1356	41.2847
X	scaffold1402.1	454	2354	49.0895	60.5397
X	scaffold1402.1	3969	5631	24.6987	27.6392
X	scaffold1402.1	10858	13167	21.209	25.8131
X	scaffold1402.1	13421	17999	20.1003	17.728
2L	scaffold1404.1	19466	25798	18.2948	13.1654
2L	scaffold1404.1	34885	36914	4760.34	3246.71
X	scaffold1405.1	189	7184	37.979	36.4623
X	scaffold1405.1	7272	8041	17.0662	21.146
2R	scaffold1406.1	1	3543	28.9107	25.5897
3R	scaffold1408.1	3515	8207	55.2871	60.3354
3R	scaffold1408.1	8340	11481	24.9161	25.3315
3R	scaffold1408.1	12039	17391	32.9392	32.2992
3L	scaffold1410.1	3858	5150	622.987	746.404
3L	scaffold1410.1	5476	6252	31.9914	32.9879
3L	scaffold1410.1	7020	9384	24.3597	10.1688
3L	scaffold1410.1	9626	10750	13.9427	15.4165
3L	scaffold1410.1	10924	14343	24.4978	25.9986
2L	scaffold141.1	52965	61262	18.2964	16.6557
2L	scaffold141.1	7144	48893	16.6706	17.5865
3L	scaffold1411.1	9186	13258	23.1813	21.1337
3L	scaffold1411.1	19833	20560	32.3514	67.5164
3L	scaffold1411.1	20087	22574	32.6948	19.5598
3L	scaffold1411.1	22740	23498	9.09469	8.16699
3L	scaffold1411.1	15504	19452	419.963	487.044
3L	scaffold1412.1	1410	2457	10.9531	9.811
3L	scaffold1412.1	2797	8254	18.5173	21.2386
3L	scaffold1412.1	9263	10649	16.2157	11.1427
3L	scaffold1412.1	11485	12425	32.5999	27.4367
3L	scaffold1417.1	1	1765	29.3356	30.0851
3L	scaffold1417.1	2759	3360	9.61067	7.75491
3L	scaffold1417.1	23295	24168	16.3066	18.8266
3L	scaffold1417.1	13920	19449	14.5311	16.8218
3R	scaffold1420.1	22777	23869	9.84769	9.68106
2L	scaffold142.1	10714	15691	10.2917	9.39446
2L	scaffold142.1	20414	21282	15.1287	9.03401
2L	scaffold142.1	21348	26795	14.2799	14.1931
2L	scaffold142.1	28671	30160	76.4613	46.2187
2L	scaffold142.1	36953	38451	15.6864	15.99
2L	scaffold142.1	39757	41749	9.19801	8.13088
2L	scaffold142.1	16172	16848	29.877	32.0277
2L	scaffold142.1	30632	35446	387.397	286.242
2L	scaffold142.1	91350	101267	444.724	361.275
3L	scaffold1423.1	4884	9892	16.5936	14.8341
3L	scaffold1423.1	10149	10964	8.40259	2.44668
3L	scaffold1423.1	11864	16253	8.96772	8.29218
3L	scaffold1423.1	25718	30207	8.89644	7.7666
3L	scaffold1423.1	30708	32678	11.3581	12.1345
3L	scaffold1423.1	32747	33934	16.1255	11.016
3R	scaffold1425.1	971	1883	16.7477	15.6024
3R	scaffold1425.1	3021	7654	68.3982	72.3237
3R	scaffold1425.1	9673	11106	15.0567	35.3009
3R	scaffold1425.1	18171	18791	10.175	5.10295
3R	scaffold1425.1	18845	19509	27.225	15.4229
3R	scaffold1425.1	20030	21691	16.5086	15.8806
3R	scaffold1425.1	34687	38761	26.2889	23.8264
3R	scaffold1425.1	11626	16958	20.9217	42.9379
3L	scaffold1428.1	953	2006	9.55563	8.34234
3L	scaffold1428.1	7964	8919	54.2488	63.9398
X	scaffold1429.1	879	3819	13.9814	15.5362
X	scaffold1429.1	5053	7408	13.1058	16.8689
X	scaffold1429.1	7473	9106	12.5493	17.1208
X	scaffold1429.1	10060	11619	14.4019	18.7135
X	scaffold1429.1	12434	14163	25.8634	20.0091
2R	scaffold1430.1	657	8276	47.8473	45.4828
2R	scaffold1430.1	8358	13141	20.7534	14.9965
2R	scaffold1430.1	13761	19140	17.841	9.64816
3R	scaffold143.1	41228	49049	15.9618	10.0332
3R	scaffold143.1	49759	50577	7.14459	3.65657
3L	scaffold1431.1	812	3064	8.63341	10.0607
3L	scaffold1431.1	6525	8543	9.12058	6.51154
3L	scaffold1431.1	18267	20699	15.4562	7.99266
2L	scaffold1432.1	6884	10811	41.1019	30.2371
2L	scaffold1432.1	14891	19194	212.568	187.118
3R	scaffold1434.1	2027	3793	17.4196	11.2399
3R	scaffold1434.1	3877	15481	88.5822	109.244
3R	scaffold1434.1	17154	18758	59.163	47.0874
3R	scaffold1434.1	19092	21669	21.4573	23.3853
3R	scaffold1434.1	22175	23927	30.7327	25.5697
3R	scaffold1434.1	15705	17090	40.4751	34.1664
2L	scaffold1436.1	10411	11754	10.1062	8.98291
2L	scaffold1436.1	12180	13485	8.25302	11.4701
2L	scaffold1436.1	14081	17046	17.4412	29.707
X	scaffold1437.1	7	699	40.198	42.0713
X	scaffold1437.1	2564	3130	19.7487	25.7278
X	scaffold1437.1	3505	5522	67.8869	78.3355
X	scaffold1437.1	6805	7936	10.745	18.1277
X	scaffold1437.1	21069	22513	37.0502	39.6689
3R	scaffold1438.1	11761	12675	11.6777	11.8917
3R	scaffold1438.1	13529	22665	429.748	473.338
3L	scaffold144.1	247	1586	33.8341	28.7035
3L	scaffold144.1	1952	9725	28.2206	26.9685
3L	scaffold144.1	21766	23094	34.0022	44.7971
3L	scaffold144.1	23847	27002	13.7763	15.8604
3L	scaffold144.1	27817	28781	15.9961	21.2718
3L	scaffold144.1	33765	41430	15.83	18.1746
3L	scaffold144.1	34965	37136	16.6286	23.3142
3L	scaffold144.1	37656	38802	21.3161	26.3983
3L	scaffold144.1	40660	41526	12.9844	14.3396
3L	scaffold144.1	44747	48057	30.653	29.2999
3L	scaffold144.1	49340	54633	9.35353	9.19099
3L	scaffold144.1	54739	56363	22.8157	20.3443
3L	scaffold144.1	58029	59143	9.37298	4.18326
3L	scaffold144.1	59530	60389	11.1956	11.5688
3L	scaffold144.1	62189	63358	12.2829	8.92448
3L	scaffold144.1	70693	76142	35.1087	30.809
3L	scaffold144.1	10373	19519	42.9201	48.6684
3L	scaffold144.1	32415	33516	49.9586	58.5992
3L	scaffold144.1	48222	49190	10.1139	8.91934
2R	scaffold1441.1	98	598	13.3979	13.9343
2R	scaffold1441.1	2537	6277	10.959	11.6876
3R	scaffold1445.1	6111	9333	9.6292	13.3574
3R	scaffold1445.1	10506	11883	9.37947	10.6199
3R	scaffold1446.1	1177	1888	32.8643	16.2266
3R	scaffold1446.1	4417	6633	9.46341	7.08319
3R	scaffold1446.1	7979	12075	11.4846	7.7425
3L	scaffold1447.1	10908	12218	91.7249	135.985
3R	scaffold1449.1	1	534	23.04	16.6187
3R	scaffold1449.1	664	2018	13.7148	12.1207
3R	scaffold1449.1	2304	5110	29.2926	30.2465
3R	scaffold1449.1	6380	7963	9.09312	13.3885
3R	scaffold1449.1	8066	9489	48.435	51.5669
3R	scaffold1449.1	9560	12280	39.3305	36.9589
2L	scaffold145.1	28295	31681	11.1292	7.01632
X	scaffold1451.1	31103	31887	22.7544	25.823
2L	scaffold1454.1	6717	8325	15.9013	17.353
2L	scaffold1454.1	8389	15937	18.8912	21.1568
2L	scaffold1454.1	16566	18016	15.275	14.0529
2L	scaffold1454.1	18094	19868	13.8437	14.4371
X	scaffold1457.1	20903	21708	21.2445	14.631
3R	scaffold1459.1	24010	27412	7.00445	8.54432
3R	scaffold1459.1	27637	28147	27.4548	25.3957
2R	scaffold1460.1	1022	9255	19.4428	25.6852
2R	scaffold1460.1	9914	11848	10.9471	10.3728
2R	scaffold1460.1	12247	14101	15.8383	8.42326
2L	scaffold1462.1	980	1641	13.4953	13.2496
2L	scaffold1462.1	2408	4060	18.4927	21.2548
2L	scaffold1462.1	10179	10916	26.0264	19.8206
3R	scaffold1464.1	5291	6455	10.7599	14.1471
3R	scaffold1464.1	7950	8852	8.41938	5.39893
3R	scaffold1464.1	8963	13912	12.5875	11.9173
3R	scaffold1468.1	4952	6211	35.3687	32.987
3R	scaffold1468.1	7530	8050	8.32931	9.52261
3R	scaffold1468.1	9342	11506	10.6467	12.0312
3R	scaffold1468.1	12206	13723	10.3142	8.07712
3R	scaffold1468.1	13789	15711	9.39063	8.13187
3R	scaffold1468.1	17055	18473	16.3781	20.6945
3R	scaffold1468.1	21485	22562	11.3711	10.4776
3R	scaffold1468.1	22653	26863	6.24395	7.55436
3R	scaffold1468.1	27268	28894	13.3097	17.5818
3R	scaffold1468.1	28942	30838	14.3061	10.4248
2R	scaffold1470.1	32448	33063	728.369	433.037
3L	scaffold147.1	101067	101738	27.8618	33.614
3L	scaffold147.1	101257	103844	42.1139	58.0708
3L	scaffold147.1	104322	112102	39.0517	50.2715
3L	scaffold147.1	118334	119076	19.0008	16.2971
3L	scaffold147.1	141892	142743	21.1589	16.3133
3L	scaffold147.1	143869	146145	25.1065	25.9988
3L	scaffold147.1	61302	66664	18.2953	23.8992
3L	scaffold147.1	113613	117648	28.952	33.4156
2R	scaffold1471.1	38205	71478	25.0377	21.4783
3L	scaffold1472.1	935	12067	24.1336	25.4468
3L	scaffold1472.1	20979	29843	18.8755	28.7114
3L	scaffold1472.1	12133	20464	14.7368	16.428
3R	scaffold1473.1	413	1955	17.2057	19.4991
2R	scaffold1474.1	14246	15407	10.0482	5.80734
3R	scaffold1478.1	4743	5519	7.79699	3.07999
3R	scaffold1478.1	16729	18106	207.762	142.151
3R	scaffold1478.1	15902	17251	39.5107	31.2559
2L	scaffold148.1	542	1440	33.2183	38.4049
2L	scaffold148.1	2134	9659	25.0298	21.4184
2L	scaffold148.1	11930	14013	4555.88	4517.12
2L	scaffold148.1	64145	65240	17.1368	17.8518
2L	scaffold148.1	116057	116968	10.7737	14.1053
3R	scaffold1481.1	21803	23843	41.8951	41.8243
3R	scaffold1481.1	23933	27060	31.7782	30.8972
3R	scaffold1481.1	27482	29896	11.4441	13.9878
3R	scaffold1481.1	31328	32338	11.1601	10.7098
3R	scaffold1482.1	2723	3583	11.2493	9.96699
3R	scaffold1482.1	3909	4560	8.8071	11.8963
3R	scaffold1482.1	4946	7543	21.4568	24.196
3R	scaffold1482.1	7919	9930	53.5423	58.6017
3R	scaffold1482.1	10009	13666	88.5474	101.12
3R	scaffold1482.1	14892	15982	90.9757	32.398
3R	scaffold1482.1	17475	18496	19.9349	16.7366
3R	scaffold1482.1	15545	17165	161.661	187.911
3L	scaffold1483.1	11900	12698	9.56822	8.24734
3L	scaffold1483.1	13449	15539	13.7335	20.7447
3L	scaffold1483.1	18589	19850	14.934	16.8027
3L	scaffold1483.1	20905	22455	149.094	137.878
2L	scaffold1484.1	12075	13025	13.1875	17.6241
2L	scaffold1484.1	17404	30373	14.3722	11.8499
3R	scaffold1485.1	699	1428	13999.7	8310.03
3R	scaffold1485.1	1504	2617	14880.9	9721.6
3R	scaffold1485.1	2997	5821	12.9969	12.9114
3R	scaffold1485.1	5890	8154	10.7917	13.348
3R	scaffold1485.1	10391	11854	45.1564	41.7294
3L	scaffold1487.1	3318	4070	15.5807	10.1769
3L	scaffold1487.1	4439	7996	14.7091	17.4396
3L	scaffold1487.1	17701	21053	15.7738	28.0856
2L	scaffold1488.1	4734	5749	15.8525	14.9244
2L	scaffold1488.1	6670	8079	12.5998	13.797
2L	scaffold1488.1	9798	11721	43.266	39.1008
2L	scaffold1488.1	12019	15939	31.0655	34.7552
2L	scaffold1488.1	18062	18877	136.175	125.25
3R	scaffold1489.1	8966	17500	54.7729	58.4474
3L	scaffold149.1	38179	40162	19.9803	22.8723
3L	scaffold149.1	44685	47000	206.127	147.265
3L	scaffold149.1	53562	55515	195.978	377.512
3L	scaffold149.1	68854	71034	16.0422	6.85238
3L	scaffold149.1	72328	75047	15.4128	16.4955
3L	scaffold149.1	63747	65663	7.50609	21.6
X	scaffold1491.1	54	726	28.3847	35.7526
X	scaffold1491.1	4428	9177	10.5209	8.90564
X	scaffold1491.1	10610	15122	16.9698	12.5481
X	scaffold1491.1	16493	17413	22.0254	24.6653
2R	scaffold1492.1	9737	14314	24.9968	28.224
3L	scaffold1493.1	1	753	32.379	52.2941
3L	scaffold1493.1	19924	24650	37.6412	32.0597
3L	scaffold1493.1	15062	17958	118.536	44.9425
3L	scaffold1494.1	6144	11242	51.4616	63.4958
3L	scaffold1494.1	35623	48150	83.2437	75.3085
3L	scaffold1494.1	58095	59198	10.925	10.0307
2R	scaffold1495.1	16959	18499	25.8052	33.5596
2R	scaffold1496.1	6948	7469	8.08808	12.5577
3L	scaffold1498.1	331	3459	19.053	13.5588
3L	scaffold1498.1	4025	4811	10.2637	10.7635
3L	scaffold1498.1	11914	13140	11.9051	13.6489
X	scaffold1499.1	444	4151	41.4667	42.285
X	scaffold1499.1	10250	15658	15.2739	11.78
3R	scaffold1500.1	17491	20124	27.0798	30.1941
3R	scaffold1500.1	23003	26300	36.9011	30.0554
3R	scaffold1500.1	26397	27059	54.6706	83.7141
3R	scaffold1500.1	41295	43520	21.7279	21.1868
3R	scaffold1500.1	47276	48279	8.17395	8.77855
3R	scaffold1500.1	50503	52403	16.0984	16.7697
3R	scaffold1500.1	52868	53382	7.25481	3.87668
3R	scaffold1500.1	60343	61062	7.42898	5.4164
3R	scaffold1500.1	31534	33604	107.292	102.25
2R	scaffold150.1	14227	15934	28.2056	33.3945
2R	scaffold150.1	15081	16374	10.8122	7.15345
2R	scaffold150.1	16824	18785	72.4011	75.7648
2R	scaffold150.1	22969	24819	25.3276	28.4103
2R	scaffold150.1	25057	28106	13.336	17.2584
2R	scaffold150.1	28210	29115	11.1494	9.55082
2R	scaffold150.1	42428	49132	115.929	112.438
2R	scaffold150.1	49477	50607	828.751	764.944
2R	scaffold150.1	50664	51812	41.3271	38.2568
2R	scaffold150.1	51942	53194	183.628	102.879
2R	scaffold150.1	30068	33183	10.4579	9.54448
3R	scaffold1501.1	2316	11265	42.4369	28.9624
3R	scaffold1502.1	3066	3691	8.95821	10.7585
2R	scaffold1503.1	24607	28832	19.1308	19.9322
2R	scaffold1503.1	33549	34443	16.3713	14.4811
2R	scaffold1503.1	29315	33263	7.89438	4.98996
3R	scaffold1505.1	6119	20740	10.2605	6.72075
2L	scaffold15.1	17864	19243	14.6076	10.8163
2L	scaffold15.1	21102	22082	17.1865	13.7916
2L	scaffold15.1	22389	24213	59.2249	44.4917
2L	scaffold15.1	27056	31809	88.1839	66.473
2L	scaffold15.1	32923	33781	644.997	570.182
2L	scaffold15.1	37181	39484	10.3562	11.197
2L	scaffold15.1	39560	42126	13.6517	11.8675
2L	scaffold15.1	49676	50972	18.1244	17.2186
2L	scaffold15.1	51226	53213	24.8496	22.9133
2L	scaffold15.1	53275	53938	17.5746	13.4723
2L	scaffold15.1	54634	56139	10.1271	6.93778
2L	scaffold15.1	56214	58510	8.06675	8.84305
2L	scaffold15.1	82011	85714	12.5346	11.0943
2L	scaffold15.1	86353	87199	21.6491	23.6931
2L	scaffold15.1	87719	89640	43.3111	34.9326
2L	scaffold15.1	89359	90960	42.0625	69.1945
2L	scaffold15.1	91259	94431	109.424	129.9
2L	scaffold15.1	94835	95939	24.4136	27.2103
2L	scaffold15.1	100040	103867	20.5302	20.3889
2L	scaffold15.1	1305	17571	30.4918	35.5732
2L	scaffold15.1	31918	32840	28.3353	29.118
2L	scaffold15.1	97905	99520	56.6031	57.92
X	scaffold151.1	49998	51640	11.2372	9.51664
X	scaffold151.1	54869	56492	3.6697	2274.4
X	scaffold151.1	4743	40723	20.3594	18.4025
X	scaffold151.1	47514	49700	9.55572	10.6393
X	scaffold151.1	60446	65915	120.15	190.283
2L	scaffold1511.1	146	2402	8.62927	7.7946
2L	scaffold1511.1	3758	5111	7.60722	8.48828
2L	scaffold1511.1	11664	12611	7.92811	9.58933
2L	scaffold1511.1	13462	14323	15.67	15.7545
3R	scaffold1513.1	2673	8854	29.5617	26.1287
3R	scaffold1513.1	9038	11729	27.1976	27.3073
3R	scaffold1513.1	14832	15785	48.6743	46.9026
3R	scaffold1513.1	19449	20289	16.0737	14.1764
3R	scaffold1513.1	15970	17240	45.6405	47.7234
3R	scaffold1514.1	682	11278	53.4815	50.4866
X	scaffold1515.1	2474	4830	62.7091	52.4203
X	scaffold1515.1	4903	27594	46.3697	38.3164
2L	scaffold1516.1	6438	7776	20.0664	13.0888
2L	scaffold1516.1	8219	17202	38.9736	28.2602
3L	scaffold1517.1	4392	5967	62.468	60.4281
3L	scaffold1517.1	6740	10271	21.8833	33.0607
3L	scaffold1517.1	10322	12533	54.9358	69.0173
3L	scaffold1517.1	14527	18565	226.199	210.988
X	scaffold1519.1	1030	5581	17.0365	20.9502
X	scaffold1519.1	5897	7733	18.689	20.3313
2L	scaffold1520.1	2156	7391	38.2664	35.2944
2L	scaffold152.1	34549	41131	14.0461	7.62548
2R	scaffold1521.1	1865	3334	24.4856	19.2796
2R	scaffold1521.1	5112	6593	10.856	10.4225
2R	scaffold1521.1	9879	14172	14.4186	10.0102
2R	scaffold1521.1	14394	16367	8.65867	9.459
2L	scaffold1524.1	4390	5827	9.74626	8.75896
2L	scaffold1524.1	7364	8003	15.6806	14.8073
2L	scaffold1524.1	12392	20066	215.158	440.612
3R	scaffold1525.1	511	11597	44.8545	41.94
3R	scaffold1525.1	20432	27210	15.9306	25.2411
3R	scaffold1525.1	13457	19892	8.81409	5.79157
X	scaffold1529.1	3847	12587	172.049	200.248
X	scaffold1529.1	12706	14016	13.4286	10.4279
X	scaffold1529.1	21428	29362	185.084	200.909
2L	scaffold153.1	12955	14417	49.6717	36.2252
2L	scaffold153.1	18375	19363	9.11254	8.51553
2L	scaffold153.1	20672	22018	11.9451	9.35005
2L	scaffold153.1	22529	24200	105.663	69.3116
2L	scaffold153.1	33808	34485	151.602	177.53
2L	scaffold153.1	35188	36358	29.2656	27.478
2L	scaffold153.1	38565	40177	8.65863	8.36292
2L	scaffold153.1	40788	42869	10.1416	8.50865
2L	scaffold153.1	43362	45118	17.9601	19.4019
2L	scaffold153.1	43982	45746	20.6601	17.0437
2L	scaffold153.1	46071	47211	20.4814	16.0046
2L	scaffold153.1	14811	17769	67.2138	84.5605
2L	scaffold153.1	27831	33398	469.195	392.471
3R	scaffold1532.1	4528	14690	39.7809	35.4824
3R	scaffold1532.1	18966	21953	44.5034	43.3187
3R	scaffold1532.1	24701	25546	7.38484	7.19381
3R	scaffold1532.1	27329	28353	36.4922	36.583
3R	scaffold1532.1	29530	31458	20.7407	18.1743
3R	scaffold1532.1	15522	18457	53.2102	53.9205
2R	scaffold1534.1	10709	12748	118.165	128.416
2R	scaffold1534.1	14894	17635	14.2759	14.8868
2L	scaffold1536.1	8911	14891	11.4595	12.8049
2L	scaffold1536.1	14957	16642	11.355	11.4672
3R	scaffold1537.1	6637	8332	10.6942	13.923
3R	scaffold1537.1	9049	11618	35.2057	46.472
3R	scaffold1537.1	12690	14167	19.5763	23.5288
3R	scaffold1537.1	16596	19863	103.257	123.079
3R	scaffold1537.1	19973	21395	126.454	165.794
3R	scaffold1538.1	13045	14892	428.497	320.83
3R	scaffold1538.1	15640	16667	28.2859	22.658
3R	scaffold1540.1	10045	12727	175.465	158.776
3R	scaffold1540.1	13830	14548	47.3321	29.6207
3R	scaffold1540.1	25179	26066	7.57942	8.41988
3R	scaffold1540.1	14825	17891	166.509	178.167
2R	scaffold154.1	33267	43760	18.8257	13.6229
X	scaffold1541.1	1387	5235	21.1651	23.6591
X	scaffold1541.1	23402	26037	11.2788	15.8874
X	scaffold1542.1	19862	22117	12.0609	8.98373
X	scaffold1542.1	22211	22782	8.47617	7.13873
X	scaffold1542.1	24219	29551	12.5082	13.0763
2R	scaffold155.1	23	2873	54.7591	33.5374
2R	scaffold155.1	42498	43491	12.8338	12.2949
2R	scaffold155.1	43903	44798	7.19303	10.766
2R	scaffold155.1	26644	40154	43.1573	64.1205
3L	scaffold1558.1	3358	11869	69.6838	61.3239
3L	scaffold1558.1	12077	15919	61.4242	62.3744
2L	scaffold1560.1	7487	8763	12.1756	15.2147
2L	scaffold1560.1	12623	14926	30.5594	32.1703
2L	scaffold1560.1	15790	17108	13.9774	8.75136
2L	scaffold156.1	27460	28504	22.7797	29.9858
2L	scaffold156.1	1604	26896	33.5163	40.2889
3R	scaffold1561.1	376	2304	41.1554	30.3699
3R	scaffold1561.1	3548	4350	153.459	121.779
3R	scaffold1561.1	11001	14212	10.0475	11.8321
3L	scaffold1563.1	2807	4903	152.135	163.935
3L	scaffold1563.1	5320	6515	16.1947	14.8006
3L	scaffold1563.1	10677	13697	28.2964	25.7947
3L	scaffold1563.1	14410	15587	59.4608	63.2956
3L	scaffold1563.1	26171	32540	21.0489	23.0475
3L	scaffold1563.1	32660	33368	15.9019	16.8815
X	scaffold1565.1	10196	14559	49.0054	49.1044
X	scaffold1565.1	21759	24827	10.3783	7.87944
X	scaffold1565.1	25708	27852	17.2147	16.491
X	scaffold1565.1	15006	21484	13.1094	11.3673
X	scaffold1566.1	14	1625	110.855	77.1534
3L	scaffold1567.1	3393	12855	32.9759	27.1584
3L	scaffold1567.1	24145	25766	18.8483	17.8644
3L	scaffold1567.1	31292	32568	8.29528	9.43138
3L	scaffold1567.1	35149	35861	10.4057	5.60025
3L	scaffold1567.1	32625	34913	8.53036	7.27803
3R	scaffold1568.1	10253	10932	8.90146	5.36312
3R	scaffold1568.1	18065	19011	27.634	22.0705
3R	scaffold1568.1	19037	28885	14.1408	11.4974
3R	scaffold1568.1	16318	18002	14.7446	11.8823
3R	scaffold1569.1	10543	12191	16.2638	19.2911
3R	scaffold1569.1	12514	14485	47.9748	30.4349
3R	scaffold1569.1	16279	17509	15.202	11.8148
3L	scaffold157.1	356	3346	15.9469	16.7899
3L	scaffold157.1	3896	4778	12.0867	14.2256
3L	scaffold157.1	5075	10500	9.85567	10.045
3L	scaffold157.1	10608	11550	13.2128	20.4606
3L	scaffold157.1	34394	38096	23.499	20.6058
3L	scaffold157.1	37927	41073	93.526	111.184
3L	scaffold157.1	42420	46342	18.7933	13.3265
3L	scaffold157.1	15105	17033	220.377	232.012
3L	scaffold157.1	31893	34034	18.7425	15.332
3R	scaffold1572.1	896	5869	59.318	56.1908
3R	scaffold1572.1	16817	18476	32.1555	26.8704
2R	scaffold1573.1	24753	25916	15.2097	13.8874
2R	scaffold1573.1	27240	27815	37.0963	20.4039
2R	scaffold1573.1	36861	38251	78.8453	55.34
2R	scaffold1573.1	38492	45666	102.824	94.2131
2R	scaffold1573.1	534	24381	61.7358	59.3035
2R	scaffold1573.1	28071	36357	88.8449	80.6302
3R	scaffold1574.1	1297	5502	22.1991	23.3957
3R	scaffold1574.1	12497	14480	9.22388	15.0373
3R	scaffold1574.1	17965	21386	12.8503	15.491
3R	scaffold1574.1	22255	26676	11.5757	14.6227
3R	scaffold1574.1	16111	17093	19.5145	27.0734
2L	scaffold1575.1	3500	5759	294.149	249.716
2L	scaffold1575.1	6827	11569	177.467	147.135
2L	scaffold1575.1	28309	30166	9.68687	6.9345
2L	scaffold1575.1	34351	37490	13.5872	11.7648
2L	scaffold1575.1	31006	33162	10.1937	10.6934
3L	scaffold1576.1	5400	6635	131.29	105.202
3L	scaffold1576.1	7598	10375	9.36984	5.13128
3R	scaffold1577.1	915	1856	168.68	203.104
3R	scaffold1577.1	2761	3704	98.4399	94.6941
3R	scaffold1577.1	3762	10307	71.5196	53.9228
2L	scaffold1578.1	3696	6374	9.39804	7.09335
2L	scaffold1578.1	13126	14143	13.879	14.4311
2L	scaffold1578.1	16778	18157	7.67692	7.9522
X	scaffold1583.1	15500	16446	21.0297	18.0042
3R	scaffold1584.1	72	2077	43.6932	40.718
3R	scaffold1584.1	16275	22668	21.7638	15.7461
3L	scaffold1586.1	9737	10753	51.2745	59.6591
3L	scaffold1586.1	28955	36033	45.496	50.2037
X	scaffold1587.1	27	16243	32.9964	40.7154
2L	scaffold1588.1	37	8321	15.2231	12.3014
2L	scaffold1588.1	10353	15085	13.7022	16.023
2L	scaffold1588.1	17586	19952	91.0859	96.899
2L	scaffold1588.1	20543	21532	50.6764	48.4098
2L	scaffold1588.1	22114	23363	10.7722	8.61685
2L	scaffold1588.1	15672	16406	22.9806	22.7899
3R	scaffold1590.1	1	5643	23.5256	17.7026
3R	scaffold1590.1	9504	10115	18.9606	21.2438
3R	scaffold1590.1	10244	11411	12.3416	13.6081
3R	scaffold1590.1	11468	12168	13.8348	15.4758
3R	scaffold1590.1	17113	19375	25.3032	26.948
2R	scaffold159.1	91329	92182	10.7904	8.59669
3R	scaffold1591.1	17575	18849	16.2497	17.5506
3R	scaffold1591.1	25383	27490	8.91343	8.72265
3R	scaffold1591.1	30113	31649	10.0196	7.22169
3R	scaffold1591.1	15052	17012	14.338	15.6223
3R	scaffold1594.1	2318	6286	20.1633	25.5951
3R	scaffold1594.1	7303	12700	92.8729	97.553
3R	scaffold1594.1	13548	14530	20.4451	25.2466
3R	scaffold1594.1	15995	17923	27.8656	20.9652
3L	scaffold1596.1	21537	25084	19.1128	20.5528
2L	scaffold1597.1	7726	10897	182.904	184.323
2L	scaffold1597.1	31698	32341	10.4172	7.63263
2L	scaffold1597.1	34951	36778	9.28135	9.73307
2L	scaffold1597.1	12219	30949	14.8977	12.2367
2L	scaffold1597.1	32513	33314	11.9425	8.67137
2L	scaffold1598.1	6089	8852	64.4007	81.0926
2L	scaffold1599.1	3134	11332	23.9125	23.9657
3R	scaffold1600.1	1	620	63.8333	46.0509
3R	scaffold1600.1	7752	8418	16.1419	14.7834
3R	scaffold1600.1	9731	11861	13.2438	13.3888
3R	scaffold1600.1	11929	15354	8.89609	8.44029
3R	scaffold1600.1	18402	19824	17.8175	15.0286
X	scaffold160.1	2064	4158	16.4936	14.109
X	scaffold160.1	5553	8450	38.4598	33.952
X	scaffold160.1	8809	10053	19.528	37.713
X	scaffold160.1	10125	10675	18.1118	17.7727
X	scaffold160.1	17192	20961	23.3409	33.0941
X	scaffold160.1	21025	21699	21.4832	21.8924
X	scaffold160.1	11583	16810	29.8219	34.9606
3R	scaffold1601.1	10151	10758	8.02157	20.753
3R	scaffold1601.1	13015	16184	9.1512	13.6059
3R	scaffold1601.1	16450	17900	7.67753	18.8733
2R	scaffold1603.1	1452	9632	14.2524	16.9251
3L	scaffold1605.1	4744	32130	27.7473	27.7419
2L	scaffold1606.1	15929	16606	7.71988	3.67594
3L	scaffold1609.1	5498	12571	23.6537	37.8907
2R	scaffold161.1	5	657	30.2346	24.2971
2R	scaffold161.1	13962	14640	151.082	119.584
2R	scaffold161.1	20806	22213	1400.92	1058.15
2R	scaffold161.1	26376	27836	16.005	17.4542
2R	scaffold161.1	26376	27836	24.5427	24.8123
2R	scaffold161.1	47445	52553	418.343	400.332
2R	scaffold1611.1	13725	18300	15.9497	10.3388
X	scaffold1614.1	441	12696	72.572	100.73
X	scaffold1614.1	19288	21950	58.5243	58.6992
X	scaffold1614.1	24826	26263	15.7754	12.409
X	scaffold1614.1	26958	28318	10.3712	8.15453
X	scaffold1614.1	28791	29361	53.5943	78.6708
X	scaffold1614.1	15420	19197	52.4227	42.8321
X	scaffold1618.1	9083	22063	11.2512	17.0852
3L	scaffold1620.1	1	5543	30.9665	36.1339
3L	scaffold1620.1	6179	9923	28.7831	33.2375
2R	scaffold162.1	39129	41116	8.20693	7.63246
2R	scaffold162.1	65412	66161	7.12249	7.45356
3R	scaffold1622.1	26082	28084	24.3378	26.4927
3R	scaffold1622.1	28456	29519	9.57273	13.7009
2L	scaffold1624.1	11499	12317	43.5629	49.1172
3L	scaffold1625.1	4389	9098	40.8529	43.426
3L	scaffold1625.1	11115	15828	507.745	341.923
X	scaffold1629.1	2547	6626	170.783	188.698
2R	scaffold163.1	9089	10166	20.3356	28.512
2R	scaffold163.1	13439	14087	21.475	23.845
2R	scaffold163.1	39182	40303	33.0559	32.1785
2R	scaffold163.1	41500	42881	75.2866	42.6794
2R	scaffold163.1	55298	56706	21.8332	30.5998
2R	scaffold163.1	57704	64769	12.4029	16.2439
2R	scaffold163.1	82179	83124	7.34009	9.21121
2R	scaffold163.1	83869	85193	7.58239	11.5986
2R	scaffold163.1	85604	91213	18.2646	16.1322
2R	scaffold163.1	91283	92851	21.1444	20.5269
2R	scaffold163.1	93607	98094	14.8479	5.86806
2R	scaffold163.1	98525	100920	8.52653	7.39972
2R	scaffold163.1	46737	55223	9.5932	13.3659
2R	scaffold163.1	106513	125419	20.7307	22.9399
X	scaffold1631.1	1409	11178	25.2725	25.6284
X	scaffold1631.1	11235	15909	46.0239	50.3019
3R	scaffold1632.1	52	8035	16.088	14.6645
X	scaffold1633.1	24412	26533	9.43539	7.9584
X	scaffold1633.1	26620	28763	12.1247	16.3286
X	scaffold1633.1	41494	43276	13.5856	7.75604
X	scaffold1633.1	1482	17019	40.58	29.799
X	scaffold1633.1	28834	37861	11.9227	11.8883
X	scaffold1634.1	3090	13228	9.95489	11.3344
X	scaffold1634.1	33420	34253	27.7501	27.9663
X	scaffold1634.1	35512	41664	40.8309	35.512
X	scaffold1636.1	15023	15683	12.3871	5.5108
X	scaffold1636.1	15742	18065	14.0703	12.8532
2R	scaffold1638.1	924	1928	7.10904	10.0565
2R	scaffold1638.1	4499	5052	16.4041	15.268
2R	scaffold1638.1	6885	7877	32.0922	29.8444
2R	scaffold1638.1	8893	9654	18.2069	19.3316
2R	scaffold1638.1	11176	14236	14.9617	16.3053
2R	scaffold1638.1	15204	17362	220.579	174.929
3L	scaffold1640.1	8709	9522	23.0012	25.2297
3L	scaffold1640.1	21165	23793	39.3054	46.9351
3L	scaffold1640.1	23202	24830	14.1404	10.942
3L	scaffold1640.1	26556	28495	53.3091	152.303
3L	scaffold1640.1	13138	20463	16.7044	12.6365
3L	scaffold1640.1	14288	16878	24.5205	16.9925
2R	scaffold164.1	1	1647	30.0022	18.1466
2R	scaffold164.1	9582	15970	20.9957	18.6945
2R	scaffold164.1	17393	18818	39.5003	30.5306
2R	scaffold164.1	19584	22218	9.44234	8.82134
2R	scaffold164.1	14134	17337	14.0295	16.5192
3L	scaffold1641.1	6392	8598	44.9239	47.8823
3L	scaffold1641.1	12074	13812	21.4963	22.0944
3L	scaffold1641.1	14719	15869	16.3362	14.1599
3L	scaffold1641.1	16930	17812	8.05471	6.296
3L	scaffold1641.1	19949	21026	15.6101	11.2974
X	scaffold1643.1	294	4665	23.6913	18.0758
X	scaffold1643.1	8603	15299	19.5083	20.9157
2L	scaffold1644.1	103	1888	139.08	115.524
2L	scaffold1644.1	1233	4221	79.551	72.3988
2L	scaffold1644.1	6445	7352	201.764	133.397
2R	scaffold1645.1	3954	6195	12.5188	17.2014
2R	scaffold1645.1	6567	9554	744.207	472.519
3R	scaffold1647.1	11344	11983	10.8336	13.4451
3R	scaffold1647.1	27219	29064	13.8128	18.9356
3R	scaffold1647.1	30231	34357	12.418	12.9123
2R	scaffold1648.1	25159	26010	25.7233	21.9333
2R	scaffold1648.1	26187	27806	30.809	25.05
X	scaffold1649.1	72	8899	14.3589	11.3664
X	scaffold1649.1	11244	12343	106.791	110.681
X	scaffold1649.1	13557	15500	36.7613	37.9323
X	scaffold1649.1	19332	20457	26.2539	25.3729
X	scaffold1649.1	15956	19155	12.166	10.8904
2R	scaffold1652.1	82	1166	13.9945	10.2164
2R	scaffold1652.1	2531	4549	171.846	199.17
2R	scaffold1652.1	5161	17149	38.4444	39.35
3L	scaffold1654.1	455	1678	16.3816	96.3028
3L	scaffold1654.1	1921	3309	11.1815	13.8475
3L	scaffold1654.1	4890	9488	50.3617	49.2613
3L	scaffold1654.1	39751	45479	28.4247	24.2632
3L	scaffold1654.1	11454	35812	27.9858	22.9517
3R	scaffold1655.1	2358	4300	17.2721	19.0101
3R	scaffold1655.1	5596	14157	33.8995	29.8148
3R	scaffold1655.1	15215	17519	16.8836	17.8708
2R	scaffold1656.1	1	5422	49.1038	32.199
3L	scaffold1657.1	42679	44279	8.34758	7.58192
X	scaffold1658.1	19387	22935	22.4206	21.0726
X	scaffold1659.1	2182	3052	11.1812	10.0436
X	scaffold1659.1	8877	11265	14.6127	15.0448
X	scaffold1663.1	1606	2869	25.0462	28.6265
X	scaffold1663.1	2934	4067	16.6291	9.06788
2L	scaffold1664.1	351	4544	14.9565	9.9465
2L	scaffold1664.1	4703	15116	20.1298	14.5998
2L	scaffold1664.1	16548	19323	24.4547	25.07
3R	scaffold1665.1	9819	15926	10.9337	3.74923
3R	scaffold1665.1	19684	22940	8.26292	7.59896
X	scaffold1668.1	11	2524	14.4101	11.1882
X	scaffold1668.1	5110	5652	7.7031	9.15517
X	scaffold1670.1	771	1357	9.47469	6.90438
X	scaffold1670.1	2227	4227	13.5026	17.6851
X	scaffold1670.1	4445	6232	13.016	9.87984
X	scaffold1670.1	8178	9202	17.4356	15.3595
2L	scaffold1676.1	9567	11502	9.50339	9.89057
2L	scaffold1676.1	15554	48371	12.8438	12.1829
2R	scaffold1677.1	2292	5761	196.315	214.074
2R	scaffold1677.1	5838	7567	123.215	134.908
2R	scaffold1677.1	6692	8283	508.356	756.654
2R	scaffold1677.1	20753	21270	13.1609	12.0573
2R	scaffold1677.1	11296	19328	186.073	214.785
2L	scaffold1680.1	5849	13293	55.5275	75.0099
2L	scaffold1680.1	14433	18471	46.166	44.5829
3L	scaffold168.1	17558	29291	32.0102	46.6479
3L	scaffold168.1	34565	36313	23.4866	25.7901
3L	scaffold168.1	41185	44031	18.7458	34.5244
3L	scaffold168.1	42984	45266	15.7007	6.00445
3L	scaffold168.1	45702	46541	7.28761	4.35346
3L	scaffold168.1	51853	52629	81.2728	252.555
3L	scaffold168.1	53372	56223	18.3705	27.3386
3L	scaffold168.1	59195	60040	21.117	50.1522
3L	scaffold168.1	62066	63995	14.1067	8.38422
3L	scaffold168.1	64602	65502	4.98108	26.1176
3L	scaffold168.1	66191	68303	14.7399	21.4436
3L	scaffold168.1	83366	86234	104.927	105.072
3L	scaffold168.1	86676	87550	17.4095	21.2388
3L	scaffold168.1	98538	100250	16.8286	15.3531
3L	scaffold168.1	100411	101127	18.0947	26.4249
3L	scaffold168.1	110393	113081	77.409	21.857
3L	scaffold168.1	117630	118256	160.467	86.428
3L	scaffold168.1	123483	126217	27.6324	24.0933
3L	scaffold168.1	31602	33438	10.4576	8.45833
3L	scaffold168.1	81459	82307	19.2501	35.4422
3L	scaffold168.1	97377	98465	33.7072	24.4443
3L	scaffold168.1	103221	122254	278.393	250.004
3L	scaffold168.1	114583	117543	94.1429	85.7827
3L	scaffold168.1	126319	136683	24.5555	18.1817
3R	scaffold1683.1	1454	2354	24.8029	24.9506
3R	scaffold1683.1	10440	18512	581.59	501.413
2L	scaffold1685.1	1220	2934	131.063	157.292
2L	scaffold1685.1	8540	9266	18.4832	20.0702
3L	scaffold1687.1	12178	14181	144.67	224.382
3R	scaffold1689.1	381	2386	73.0763	73.6937
3R	scaffold1689.1	3190	7304	17.7621	20.0184
3R	scaffold1689.1	9769	11992	12.0231	17.1999
X	scaffold1690.1	32009	32552	11.1834	15.7444
X	scaffold169.1	38391	45138	36.873	33.9591
X	scaffold169.1	47657	48180	7.73663	8.25521
3R	scaffold1691.1	2	6690	72.5844	68.3418
X	scaffold1693.1	13226	16399	56.9267	48.6545
3L	scaffold1694.1	411	2298	15.5757	22.3935
3L	scaffold1694.1	3726	5629	17.6044	13.0895
3L	scaffold1695.1	10687	15496	31.7557	43.3858
3L	scaffold1695.1	15565	17183	47.9472	51.9214
3R	scaffold1698.1	4048	7363	143.218	104.956
3R	scaffold1698.1	14894	20682	56.8336	71.4087
2R	scaffold1700.1	621	2821	17.394	14.9528
2R	scaffold170.1	11988	13138	33.0124	27.0392
2R	scaffold170.1	13210	14011	9.91772	4.0306
2R	scaffold170.1	23838	25499	8.57427	6.50615
2R	scaffold170.1	71654	75192	9.59661	10.2605
2R	scaffold170.1	93975	96048	34.5685	39.7813
2R	scaffold170.1	98767	101659	30.5006	31.218
2R	scaffold170.1	102504	104410	19.2104	49.5129
2R	scaffold170.1	137619	139988	118.358	104.112
2R	scaffold170.1	141311	142594	13.1501	11.6742
2R	scaffold170.1	142656	143555	11.0059	13.27
2R	scaffold170.1	143747	145688	12.4606	11.2698
2R	scaffold170.1	146261	147108	73.7832	90.5405
2R	scaffold170.1	147916	153135	101.894	114.668
2R	scaffold170.1	153977	155547	11.8405	8.55911
2R	scaffold170.1	161770	163098	26.1867	25.1298
2R	scaffold170.1	175966	176954	7.22152	9.24563
2R	scaffold170.1	14288	17608	11.7582	9.92919
2R	scaffold170.1	32555	33425	8.9939	8.48701
2R	scaffold170.1	38227	70463	16.1077	17.9932
2R	scaffold170.1	62591	70038	14.1011	9.98598
2R	scaffold170.1	163171	174803	53.838	53.4278
X	scaffold1703.1	6147	7088	24.1017	28.0343
X	scaffold1703.1	7187	16713	15.3215	20.7723
3L	scaffold1707.1	27342	29392	14.39	9.47156
3L	scaffold1707.1	28701	29736	29.9193	30.4463
3L	scaffold1707.1	30712	31695	1243.72	1642.64
3L	scaffold1707.1	31761	32419	18.2601	9.41868
3L	scaffold1707.1	35455	40835	40.6095	41.364
3L	scaffold1707.1	6122	26780	15.8385	18.118
3L	scaffold1708.1	1	1512	30.6822	29.7197
3L	scaffold1708.1	6847	9164	16.4082	16.9394
3R	scaffold1709.1	2001	2953	21.8318	60.5978
3R	scaffold1709.1	5078	7394	39.819	35.3469
3R	scaffold1709.1	8317	15906	42.3041	38.112
3R	scaffold1709.1	17711	19854	28.8388	36.3198
2R	scaffold17.1	37034	39706	140.809	154.41
2R	scaffold17.1	44876	46772	9.57317	8.65287
2R	scaffold17.1	46843	48878	9.25958	8.58514
2R	scaffold17.1	50672	51340	7.4157	7.70444
2R	scaffold17.1	52023	53291	13.644	12.9512
2R	scaffold17.1	55029	56220	9.94112	9.18687
2R	scaffold17.1	60242	62216	12.7414	12.7461
2R	scaffold17.1	75558	79089	22.2479	12.8076
2R	scaffold17.1	83007	88429	111.664	102.111
2R	scaffold17.1	94394	96469	34.5586	41.2298
2R	scaffold17.1	101831	102367	13.4955	16.4081
2R	scaffold17.1	19259	33187	76.6404	71.113
2R	scaffold17.1	81194	83113	23.6314	20.5244
2R	scaffold1710.1	4146	9682	145.94	140.424
2R	scaffold1710.1	13081	16022	37.5792	46.553
2R	scaffold1710.1	17124	20073	27.9887	17.1179
2R	scaffold1710.1	20329	21653	11.416	6.4641
2L	scaffold171.1	38452	40861	15.1754	15.1946
2L	scaffold171.1	41587	46566	17.0662	18.6554
2L	scaffold171.1	53064	54491	9.21195	8.24733
2L	scaffold171.1	54946	56337	9.27255	10.71
2L	scaffold171.1	56404	57831	9.7748	7.27319
2L	scaffold171.1	12435	30379	22.3256	19.2266
2L	scaffold1718.1	21541	23586	48.99	49.3305
2L	scaffold1718.1	5656	17604	13.4936	26.9349
2R	scaffold1719.1	18968	21437	245.281	288.972
2R	scaffold1719.1	23528	25504	74.4217	80.8573
2L	scaffold172.1	682	13781	16.0808	15.161
3L	scaffold1726.1	13901	15274	25.8849	27.1115
3L	scaffold1726.1	15438	20277	30.3541	41.4452
3R	scaffold1728.1	393	4181	20.6351	22.1139
3R	scaffold1728.1	5271	13117	23.7791	24.2284
3R	scaffold1728.1	14431	16038	27.8356	30.8221
2R	scaffold173.1	8182	14801	251.505	264.504
2R	scaffold173.1	15334	16148	159.73	112.938
2R	scaffold173.1	17625	18595	10.2098	11.1018
2R	scaffold173.1	18666	20733	12.5638	23.1946
2R	scaffold173.1	20801	23271	17.3257	93.9464
2R	scaffold173.1	25689	27613	18.9764	15.3334
2R	scaffold173.1	35256	36055	8.71938	9.76616
2R	scaffold173.1	50397	59633	10.796	16.0313
2R	scaffold173.1	62151	64017	11.9187	15.3168
2R	scaffold173.1	84421	89635	20.8747	22.3394
2R	scaffold173.1	90108	96290	16.3056	18.059
2R	scaffold173.1	104179	111596	56.611	61.7319
2R	scaffold173.1	122655	123257	7.13163	15.6055
2R	scaffold173.1	16372	17552	13.5221	14.4439
[truncated: 6,861 more rows]

## Sheet: D.robusta
Chromosome	Scaffold	Gene_Start	Gene_Stop	Male_FPKM	Female_FPKM
2R	scaffold10020.1	1183	2310	15.6921	16.7024
3R	scaffold1003.1	5239	7028	32.7929	34.7407
3R	scaffold1003.1	8204	9399	10.0867	10.9299
3R	scaffold1003.1	10079	11101	14.9988	9.21741
3R	scaffold1003.1	17959	21027	10.2171	9.93218
3R	scaffold1003.1	22977	23779	22.5471	25.0325
3L	scaffold10032.1	205	2291	41.23	31.8011
2L	scaffold10036.1	1	2542	22.5443	24.0944
4	scaffold1004.1	13731	14669	12.1165	12.0904
4	scaffold1004.1	19595	28899	25.5556	23.05
4	scaffold1004.1	14733	18340	12.0088	11.2723
4	scaffold1005.1	1318	3852	68.618	59.5728
4	scaffold1005.1	6890	9199	16.7528	12.9814
4	scaffold1005.1	20020	29863	76.6338	80.4988
4	scaffold1005.1	9263	17362	16.9556	14.4381
3L	scaffold10063.1	1	2277	24.2227	25.5892
2L	scaffold1007.1	1	3077	16.5679	17.7218
2L	scaffold1007.1	3911	11544	20.408	20.5156
2L	scaffold1007.1	12846	13379	5.66909	9.32157
2L	scaffold1007.1	19751	20766	12.427	11.3171
2L	scaffold1007.1	24423	28686	104.125	134.113
2L	scaffold1007.1	15188	18936	9.40132	8.60174
X	scaffold10072.1	88	1811	69.8299	69.2168
2L	scaffold10074.1	582	2068	39.9087	33.0978
3L	scaffold1008.1	22412	23079	1372.61	1354.73
3L	scaffold1008.1	23183	23842	144.194	122.929
3R	scaffold10090.1	1005	2251	12.7035	13.8916
X	scaffold10108.1	1056	1838	15.5273	13.5664
2R	scaffold1011.1	32	1214	23.1818	21.3046
2R	scaffold1011.1	2782	15435	86.5563	57.9924
2R	scaffold1011.1	16119	18755	267.183	242.621
3L	scaffold1012.1	15694	30120	36.4914	37.0279
3L	scaffold1013.1	23190	28875	25.6798	25.9474
3L	scaffold1013.1	33988	36124	15.5126	16.3844
3L	scaffold1014.1	26	4254	33.9752	31.9205
3L	scaffold1014.1	6971	14418	29.7506	30.0972
3L	scaffold10143.1	469	2302	35.4308	34.4657
2R	scaffold10144.1	592	2163	16.0827	16.4179
3L	scaffold1015.1	6188	7191	10.5257	7.92607
3L	scaffold1015.1	7487	8129	8.97855	8.58631
3L	scaffold1015.1	9881	11544	18.2366	21.6722
3L	scaffold1015.1	18273	20774	38.4664	25.4024
3L	scaffold1015.1	20861	25090	20.7466	21.1297
3L	scaffold1015.1	28672	29573	14.01	10.9104
3L	scaffold1015.1	30584	31900	19.6722	25.5442
3L	scaffold1015.1	34197	35249	47.486	54.9373
3L	scaffold1015.1	39061	44426	12.6647	12.9117
3L	scaffold1015.1	44838	46178	22.1319	25.2252
3L	scaffold1015.1	12239	17050	8.0417	8.70173
3L	scaffold1015.1	25142	33197	25.8	25.6929
3L	scaffold1015.1	32092	33932	15.0236	16.9416
3L	scaffold10175.1	1	876	66.3002	77.4854
2L	scaffold1018.1	6053	11224	14.4965	14.3566
2L	scaffold1018.1	22954	26332	166.118	156.553
2L	scaffold1018.1	39918	40436	9.50649	5.89855
2L	scaffold1018.1	41218	45177	28.7644	25.2519
2L	scaffold1018.1	51825	54476	101.95	85.5805
2L	scaffold1018.1	68563	70026	9.80694	12.5371
2L	scaffold1018.1	72210	72934	21.0868	21.7974
2L	scaffold1018.1	74041	77380	54.5492	52.0838
2R	scaffold1020.1	5446	7909	55.6168	50.0805
2R	scaffold1020.1	27003	32978	909.315	743.984
2R	scaffold1022.1	511	5583	86.4323	88.2322
3R	scaffold1024.1	11891	24694	20.4643	19.4077
3L	scaffold10247.1	193	1659	13.238	12.4778
3R	scaffold1026.1	1	6342	37.8696	25.7489
3R	scaffold1026.1	6820	7475	30.5258	23.199
3R	scaffold1026.1	9578	14153	10.3345	8.53298
3R	scaffold1026.1	24298	24813	17.6886	21.489
3R	scaffold1026.1	25315	31561	20.416	22.1252
3R	scaffold1026.1	17084	18098	13.7887	15.7596
3R	scaffold1026.1	18170	18983	9.11442	13.8482
3R	scaffold1026.1	22924	24217	14.6322	15.2735
3R	scaffold1026.1	15276	16544	12.9954	10.0871
X	scaffold1028.1	25027	30218	14.998	18.3809
2L	scaffold1029.1	2569	3499	12.5819	10.266
2L	scaffold1029.1	7111	8899	10.0458	8.27857
2L	scaffold1029.1	18553	21321	14.835	13.3981
2L	scaffold1029.1	21430	22084	9.79516	8.59374
2L	scaffold1029.1	24560	25974	7.8644	8.88867
2L	scaffold1029.1	28836	30312	87.7606	80.2011
3L	scaffold1032.1	1698	2404	10.0738	10.5648
3L	scaffold1032.1	23752	24529	17.2538	28.4024
3L	scaffold1032.1	26280	28452	288.695	281.018
3L	scaffold1032.1	14733	23473	75.3119	84.6839
3R	scaffold1033.1	8901	15776	19.6955	17.8975
3R	scaffold1033.1	16528	17155	39.3065	37.431
3R	scaffold1033.1	17491	19586	17.481	18.04
3R	scaffold1033.1	20398	23038	126.629	117.223
3L	scaffold10335.1	2494	4001	13.5848	12.9491
X	scaffold1035.1	769	1910	16.6883	17.8313
X	scaffold1035.1	2367	3414	8.50857	8.23364
X	scaffold1035.1	4806	5377	13.0591	9.30705
X	scaffold1035.1	8069	9768	15.2374	14.6149
X	scaffold1035.1	9852	11629	16.9214	16.3965
X	scaffold1035.1	14349	16163	11.9177	9.96092
X	scaffold1035.1	23325	24660	8.55112	8.52489
X	scaffold1035.1	38994	40907	63.5389	65.6647
3L	scaffold1037.1	989	2837	25.3848	23.291
3L	scaffold1037.1	6203	7141	19.1083	13.391
3L	scaffold1037.1	11510	13910	11.0762	9.74205
3L	scaffold1037.1	20174	21668	45.4358	35.2309
3L	scaffold1037.1	12650	17102	17.6709	15.3881
2L	scaffold10373.1	1655	3364	27.6072	27.7177
2L	scaffold10378.1	4017	4866	9.02083	7.85081
2L	scaffold104.1	18412	21782	33.2758	28.006
2L	scaffold104.1	33247	34874	8.63193	7.08297
2L	scaffold104.1	49486	50810	20.5075	20.6322
2L	scaffold104.1	51476	54877	28.9478	23.3424
2L	scaffold104.1	52885	60844	12.0281	14.0044
2L	scaffold104.1	70172	71901	11.9102	12.3865
2L	scaffold104.1	72314	81497	54.8591	52.1994
2L	scaffold104.1	16203	18300	12.0147	11.5315
2L	scaffold104.1	22124	32955	28.4904	25.7106
2L	scaffold104.1	81832	87413	78.4975	67.297
3R	scaffold1041.1	7	4492	11.6642	11.3201
3R	scaffold1041.1	5058	5972	7.88601	11.5305
3R	scaffold1041.1	6060	6929	11.881	16.8714
3R	scaffold1041.1	6999	12085	14.8455	13.0337
3R	scaffold1041.1	18581	21327	18.6493	15.5253
3R	scaffold1041.1	22237	22868	8.35525	12.2904
3R	scaffold1041.1	24032	29297	16.4509	13.9827
3R	scaffold1041.1	52673	54789	5.58584	6.27238
3R	scaffold1041.1	55650	56393	412.201	427.996
3R	scaffold1041.1	56872	57565	9.09518	9.79677
3R	scaffold1041.1	12372	18178	18.3381	17.7792
3R	scaffold1041.1	31718	48835	22.4054	16.1059
3R	scaffold1043.1	21971	24211	17.499	16.2006
3R	scaffold1043.1	8696	21297	14.3197	12.5989
2R	scaffold10445.1	1	2001	30.3899	22.8762
3L	scaffold1047.1	10451	12739	32.5337	31.7192
3L	scaffold1047.1	24180	30694	5.12833	11.0679
3R	scaffold105.1	1392	3542	20.0055	21.7064
3R	scaffold105.1	11651	12941	49.6871	48.0914
3R	scaffold105.1	13395	14745	58.6649	67.5863
3R	scaffold105.1	14867	15955	80.1571	82.7702
3R	scaffold105.1	24113	29969	49.7653	48.4288
3R	scaffold105.1	50321	50978	10.0873	22.0895
3R	scaffold105.1	66543	69537	21.5286	23.6742
3R	scaffold105.1	69600	70508	14.939	16.3591
3R	scaffold105.1	15837	19320	19.503	21.232
3R	scaffold105.1	38523	49899	10.3278	27.0372
3R	scaffold105.1	81216	85173	30.2424	26.7438
3L	scaffold1053.1	57	14732	20.5589	25.1281
3L	scaffold1053.1	18999	23885	15.1204	9.47282
3L	scaffold1055.1	19968	20815	20.2289	23.7898
2R	scaffold10556.1	521	1918	66.8432	125.921
2L	scaffold1058.1	44	734	19.4263	16.8613
2L	scaffold1058.1	39054	43986	18.0723	19.5785
2L	scaffold1058.1	45855	48573	24.754	24.2322
2L	scaffold1058.1	13904	34935	9.12639	8.75195
2R	scaffold1060.1	12885	15072	8.72307	8.43939
2L	scaffold1061.1	11586	12782	14.6065	14.1444
2L	scaffold1061.1	18264	20873	10.2027	9.93833
2L	scaffold1061.1	13191	17678	23.8145	25.4104
3R	scaffold1063.1	2074	4104	208.55	190.92
3R	scaffold1063.1	4213	5545	161.939	146.552
3R	scaffold1063.1	6004	7220	86.3894	85.6914
3R	scaffold1063.1	9990	13925	89.0794	80.9055
3R	scaffold1063.1	16288	17167	28.3297	24.6248
2R	scaffold1065.1	6590	7995	33.604	44.2501
2R	scaffold1065.1	9281	10881	13.2382	14.1024
2R	scaffold1065.1	12029	14912	31.9408	25.6953
2R	scaffold1065.1	20865	22217	83.9354	92.706
2R	scaffold1065.1	15483	16810	24.3974	22.9273
X	scaffold1066.1	7856	12556	47.6253	47.7157
X	scaffold1066.1	24307	25217	5.65264	3.76614
X	scaffold1066.1	25559	29530	90.4515	90.4191
X	scaffold1066.1	12622	25966	26.041	28.7405
3L	scaffold1067.1	4109	16587	10.489	15.0827
2L	scaffold10691.1	173	1135	35.1233	33.1038
X	scaffold1070.1	220	4600	18.8743	17.4513
X	scaffold1070.1	5388	6608	25.3979	24.0797
X	scaffold1070.1	7254	13648	69.4914	59.9921
X	scaffold1070.1	14439	15885	122.6	108.871
X	scaffold1070.1	17182	20866	40.1368	42.8134
X	scaffold1070.1	21162	30219	8.2464	8.65371
2R	scaffold107.1	10482	11893	16.5792	13.2721
2R	scaffold107.1	16719	18182	25.2024	25.0599
2R	scaffold107.1	20992	26536	13.6984	14.024
2R	scaffold107.1	26723	29128	14.6248	11.8745
2R	scaffold107.1	29200	29826	9.10921	6.92758
2R	scaffold107.1	31281	32441	77.2161	69.248
2R	scaffold107.1	50708	52338	12.9552	12.3681
2R	scaffold107.1	52937	56997	11.5063	9.98258
2R	scaffold107.1	57487	60168	12.8695	11.8845
2R	scaffold107.1	60979	62843	16.1622	12.9656
3L	scaffold1071.1	5220	6510	9.90416	8.77726
3L	scaffold1071.1	7858	12681	38.5173	40.5646
3L	scaffold1071.1	14599	17350	23.3725	23.1055
2R	scaffold1072.1	323	1172	92.7283	84.1326
2R	scaffold1072.1	5669	7257	13.6374	12.7924
2R	scaffold1072.1	7767	10158	21.3567	19.594
3R	scaffold1073.1	1353	6626	68.6358	67.6444
3R	scaffold1073.1	6824	8255	17.6813	18.3219
2R	scaffold1074.1	2119	3398	11.1917	10.2153
2R	scaffold1074.1	5088	7516	11.2459	10.7164
2R	scaffold1074.1	13708	14597	10.4785	10.3697
3L	scaffold10760.1	748	1771	48.5951	45.3067
3R	scaffold1076.1	8415	9674	90.7209	72.9979
3R	scaffold1076.1	10959	12014	17.5113	6.89373
3R	scaffold1076.1	13254	14102	9.82307	11.9237
3R	scaffold1076.1	19355	28744	32.8029	36.6129
3R	scaffold1076.1	29148	30530	31.4664	34.5477
3R	scaffold1076.1	33951	35461	21.5069	25.6703
3R	scaffold1076.1	15664	17119	26.7002	20.5314
2L	scaffold1077.1	702	8828	156.171	138.156
2L	scaffold1077.1	17771	18405	11.8721	9.28251
2R	scaffold10773.1	34	1658	28.7298	29.0768
3L	scaffold10778.1	448	1403	15.2243	18.3005
3L	scaffold1078.1	3958	6040	53.469	53.3155
3L	scaffold1078.1	6641	8270	22.1088	21.3986
3L	scaffold1078.1	10021	11922	12.5701	12.9568
3L	scaffold1078.1	18378	19965	10.9888	14.3376
3L	scaffold1078.1	23554	28257	12.0055	12.8214
3L	scaffold1078.1	28334	31102	20.6467	20.6324
3L	scaffold1078.1	37200	39114	33.6074	37.536
3L	scaffold1079.1	9049	10356	98.1952	206.576
3L	scaffold1079.1	19753	22539	73.7413	80.6399
2R	scaffold108.1	3884	5015	82.4094	106.858
2R	scaffold108.1	6321	7505	133.586	148.488
2R	scaffold108.1	9508	10737	8.75585	8.51992
2R	scaffold108.1	23119	27618	34.0506	32.7863
2R	scaffold108.1	11889	37957	12.6378	13.8056
3L	scaffold1081.1	23414	24654	16.0127	16.2017
3L	scaffold1081.1	37920	39611	22.6646	26.0326
3L	scaffold1081.1	14376	17036	17.9248	28.4845
3L	scaffold1081.1	32231	37163	74.9912	98.668
X	scaffold10822.1	103	1471	91.9197	90.9668
3R	scaffold1083.1	24945	27717	60.7383	57.0336
3R	scaffold1083.1	28142	31400	27.2798	36.6544
2L	scaffold1085.1	1	949	20.3049	19.5393
2L	scaffold1085.1	3043	9107	42.6802	38.3162
3L	scaffold10852.1	99	1271	46.3399	52.0067
2R	scaffold10868.1	8	2768	22.8505	22.3647
X	scaffold10869.1	416	1177	10.0635	10.7792
2R	scaffold1087.1	17285	25351	25.8606	26.67
2L	scaffold10889.1	35	1687	9.1943	9.32354
2R	scaffold1089.1	7175	9237	153.947	142.776
2L	scaffold1090.1	613	8072	44.8848	40.7688
2L	scaffold1090.1	19906	22555	9.83372	10.5644
2L	scaffold1090.1	15450	18763	56.7081	56.9107
X	scaffold1091.1	20294	21426	112.642	109.335
3R	scaffold1092.1	2055	3527	45.4381	49.4585
3R	scaffold1092.1	21368	22492	1018.43	1174.77
3R	scaffold1092.1	24920	27822	28.8439	26.7112
3R	scaffold1092.1	4024	20714	271.073	279.328
X	scaffold1093.1	25	1860	19.1034	16.3005
X	scaffold1093.1	3394	16069	18.2275	14.3227
X	scaffold1093.1	16651	18566	12.3768	11.9607
X	scaffold1093.1	18818	19506	91.5699	75.3118
X	scaffold1093.1	20606	21705	11.5299	8.10187
3R	scaffold1094.1	5880	6646	25.136	31.2923
3R	scaffold1094.1	19580	20746	9.2444	8.8776
3R	scaffold1094.1	22560	24007	19.7356	22.6791
3R	scaffold1094.1	24354	25554	25.5245	26.0099
3R	scaffold1094.1	25822	26476	10.8001	9.76429
3R	scaffold1094.1	28512	29891	46.124	44.3779
3R	scaffold1094.1	29950	31827	28.9739	28.4556
3R	scaffold1094.1	41047	42381	14.6671	13.1426
3R	scaffold1094.1	13152	19296	25.8803	26.6612
X	scaffold1096.1	1242	2830	61.5702	76.6104
X	scaffold1096.1	5944	8045	22.1513	20.666
X	scaffold1096.1	22840	23894	15.9903	11.6218
X	scaffold1096.1	13705	21441	42.8008	39.9158
2R	scaffold1098.1	1229	2555	75.8283	77.3729
2R	scaffold1098.1	3913	5448	23.1087	21.0447
2R	scaffold1098.1	6249	7308	24.5211	23.8162
2R	scaffold1098.1	26677	27580	12.1442	12.8704
2R	scaffold1098.1	14114	19972	71.1813	132.068
X	scaffold10982.1	544	2053	30.1315	27.4819
X	scaffold10982.1	3002	4038	16.1477	14.5671
3R	scaffold1099.1	5	1416	9.15431	9.55594
3R	scaffold1099.1	4534	10102	23.0326	21.7255
3R	scaffold1099.1	11952	16033	22.162	23.4085
3R	scaffold1099.1	16737	19074	29.9901	25.8666
3R	scaffold1099.1	19579	27215	23.3045	23.2157
3R	scaffold1099.1	27591	30108	19.8362	20.4527
3R	scaffold1099.1	50612	51937	21.4868	25.9846
3R	scaffold1099.1	61995	63185	12.7493	17.1237
3R	scaffold1099.1	66761	76214	20.8885	18.7185
3R	scaffold1099.1	30335	33408	41.879	49.077
3R	scaffold1099.1	44680	50058	31.7945	32.3417
3R	scaffold1099.1	65154	66229	11.8888	12.7966
2L	scaffold110.1	20617	22888	13.5308	13.4042
2L	scaffold110.1	23797	25729	14.4459	13.2186
2L	scaffold110.1	27182	29024	8.55261	11.5364
2L	scaffold110.1	61712	62313	10.8988	12.3397
2L	scaffold110.1	10921	17742	28.7437	29.2634
2L	scaffold110.1	36252	57456	19.9509	16.9778
2L	scaffold1101.1	5548	6235	20.9311	16.3554
2L	scaffold1101.1	6670	11104	14.6668	15.2576
2L	scaffold1101.1	11812	13971	16.4631	21.0376
2L	scaffold1101.1	21096	22367	8.50114	8.48879
2L	scaffold1102.1	56159	56743	21.548	17.0681
2R	scaffold1103.1	8320	9393	7.34736	11.2158
2R	scaffold1103.1	9910	11992	59.142	64.3062
2R	scaffold1103.1	12545	13963	12.5443	12.0991
2R	scaffold1103.1	15819	18101	129.391	139.179
3R	scaffold11040.1	26	1798	9.92598	8.73451
2L	scaffold11050.1	147	1603	16.3053	13.4138
2L	scaffold1107.1	4169	5147	29.4993	29.0267
2L	scaffold1107.1	5452	7092	165.362	175.866
2L	scaffold1107.1	8184	9637	11.9371	12.107
2L	scaffold1107.1	23961	26607	12.7005	10.858
2L	scaffold1107.1	27676	30345	72.3422	67.1168
2L	scaffold1107.1	35183	36854	24.283	31.0027
2L	scaffold1107.1	16235	17814	17.6733	15.1601
2L	scaffold1107.1	31164	34556	17.291	18.7296
3L	scaffold1108.1	26	2630	14.4865	14.2865
3L	scaffold1108.1	26712	28154	600.868	698.933
3L	scaffold1108.1	2712	16738	17.5795	13.7824
3L	scaffold1108.1	32082	33795	246.961	249.547
2L	scaffold1109.1	34	667	215.341	173.702
2L	scaffold1109.1	1407	4831	375.203	366.341
2L	scaffold1109.1	21473	30228	74.4089	82.9805
2L	scaffold1109.1	9480	20527	31.1084	31.9404
3R	scaffold1110.1	663	1331	9468.9	8491.79
3R	scaffold1110.1	1549	2495	13179	14028.4
3R	scaffold1110.1	3036	3942	16.3195	9.99536
3R	scaffold1110.1	4006	5949	17.7617	16.9196
3R	scaffold1110.1	6021	8035	11.9949	9.03412
3R	scaffold1110.1	8104	10154	22.1729	16.1788
3R	scaffold1110.1	10560	12251	28.3952	31.8315
3L	scaffold11104.1	17	1754	11.1545	11.3129
2R	scaffold1112.1	1190	2433	57.4251	79.5285
2R	scaffold1112.1	3666	4304	13.8071	13.4468
2R	scaffold1112.1	4748	6242	89.3648	82.8293
2R	scaffold1112.1	7466	9205	14.312	16.0586
2R	scaffold1112.1	15451	20775	7.49535	8.79367
2L	scaffold1113.1	50835	52299	12.7293	14.8094
2L	scaffold1113.1	52730	53420	27.3194	16.6709
2L	scaffold1113.1	57373	58632	16.1031	12.5751
2L	scaffold1113.1	61653	62837	9.14377	11.2799
2L	scaffold1113.1	62900	64011	14.2971	16.4211
2L	scaffold1113.1	66109	67572	22.7504	21.2628
2L	scaffold1113.1	67260	69705	122.077	142.529
2L	scaffold1113.1	522	21513	114.156	103.086
2L	scaffold1113.1	46919	50532	19.3687	17.7675
X	scaffold1114.1	7616	10996	11.0457	12.9768
X	scaffold1114.1	11048	11824	12.0414	12.5366
X	scaffold1114.1	12036	13007	13.6606	14.9769
X	scaffold1115.1	1366	6747	23.4671	23.2572
X	scaffold1115.1	12559	13372	7.37349	11.5381
X	scaffold1117.1	2679	3905	27.4111	29.0447
X	scaffold1117.1	18246	19238	17.3835	13.6624
X	scaffold1117.1	19727	34353	21.943	16.9847
X	scaffold1119.1	5501	13735	328.688	328.651
2R	scaffold11198.1	998	1706	13.3494	14.4185
3R	scaffold1120.1	23362	29942	43.1151	48.7448
3L	scaffold1121.1	11341	14191	14.4486	16.1949
3L	scaffold1121.1	14258	15378	13.3281	10.6715
3L	scaffold1121.1	15453	16268	9.87237	8.96732
3L	scaffold1121.1	17099	18130	9.57644	7.1831
3L	scaffold1121.1	22489	23906	11.154	11.1605
2L	scaffold1122.1	24656	28682	37.3377	37.8185
2L	scaffold1122.1	9505	16839	84.5426	94.5585
2L	scaffold1122.1	31233	40995	30.6533	30.3207
2L	scaffold1124.1	774	3759	42.156	41.6376
2L	scaffold1124.1	4282	11049	102.447	120.913
2L	scaffold1124.1	12870	13799	27.863	27.13
2L	scaffold1124.1	14070	15491	18.4177	44.0934
X	scaffold11252.1	5	1697	28.7939	26.6346
3R	scaffold1126.1	122	1146	6.1384	8.42008
3R	scaffold1126.1	2593	4203	18.7669	14.7947
3R	scaffold1126.1	4275	5423	23.9531	18.9745
3R	scaffold1126.1	5488	11818	22.8741	20.8325
3R	scaffold1126.1	12602	15292	33.0611	21.4562
2L	scaffold11261.1	239	1288	12.8299	11.6565
2R	scaffold11270.1	441	1159	227.819	226.01
2R	scaffold1128.1	6961	8281	11.0197	13.4217
2R	scaffold1128.1	11126	11678	10.6109	11.4033
2R	scaffold1128.1	13601	15743	10.0488	13.6951
2R	scaffold1128.1	15449	16273	14.513	12.0824
2R	scaffold1128.1	19559	21366	13.3127	11.7769
2R	scaffold1128.1	22177	24569	247.67	237.473
2R	scaffold1128.1	25564	26537	11.6308	9.53397
X	scaffold11290.1	135	1459	111.443	150.168
3R	scaffold1130.1	941	22982	11.9974	11.1852
3L	scaffold11302.1	314	1493	16.9027	14.8774
X	scaffold1133.1	30439	30994	8.57424	7.6711
X	scaffold11332.1	29	625	10.4631	10.0144
2L	scaffold1134.1	57	654	73.8365	76.4226
2L	scaffold1134.1	2068	3913	59.2256	81.8865
2L	scaffold1134.1	7408	8204	19.8948	18.2314
3L	scaffold1136.1	18342	20868	23.1978	20.681
3L	scaffold1136.1	21140	23148	276.881	281.644
3L	scaffold1136.1	23505	27150	224.654	222.556
3L	scaffold1136.1	27586	28964	26.4505	35.2224
3L	scaffold1136.1	28664	29658	156.744	144.158
3L	scaffold1136.1	3864	16513	31.6305	40.1467
2R	scaffold1137.1	1	6658	26.8987	24.1351
2R	scaffold1141.1	2888	7670	207.349	218.172
2R	scaffold1141.1	13296	15334	41.9501	36.1429
2R	scaffold1141.1	24887	28853	46.9706	38.861
2R	scaffold1141.1	15923	22132	21.8485	24.3128
X	scaffold11427.1	78	1087	46.8838	47.0959
2R	scaffold1144.1	181	988	16.2154	12.6743
2R	scaffold1144.1	3017	3639	4.86829	4.94792
2R	scaffold1144.1	4248	6960	79.8905	67.303
2R	scaffold1144.1	7315	11730	98.5389	132.976
2R	scaffold1144.1	11935	14398	45.1219	54.1328
2R	scaffold1144.1	14617	26957	46.4232	45.878
X	scaffold1145.1	288	971	14.4929	9.45451
X	scaffold1145.1	2227	6220	22.0377	19.9516
X	scaffold1145.1	9038	11501	17.8014	24.3437
X	scaffold1145.1	14069	17655	35.8001	27.9244
2R	scaffold11457.1	417	2916	13.3396	13.9009
3R	scaffold1146.1	2903	33160	15.884	17.3644
X	scaffold1148.1	29217	29879	8.63465	9.08353
X	scaffold1148.1	31930	42207	7.57288	9.74689
X	scaffold1150.1	13787	21469	39.0277	41.554
3L	scaffold11504.1	679	1389	182.986	173.627
2R	scaffold115.1	8347	8963	49.7111	48.1618
2R	scaffold115.1	34005	35954	22.3935	24.5948
2R	scaffold115.1	36046	38790	25.7546	37.5635
2R	scaffold115.1	39439	41235	37.6219	50.1866
2R	scaffold115.1	42163	43017	18.6226	18.7502
2R	scaffold115.1	9562	28275	113.256	108.044
3R	scaffold1153.1	3841	7636	103.71	122.244
3R	scaffold1153.1	8267	8921	8.56284	6.65688
3R	scaffold1153.1	18350	19301	10.9875	10.1594
2L	scaffold1156.1	7589	12621	30.4058	31.7188
X	scaffold11575.1	1	832	24.7541	17.0037
2R	scaffold1160.1	11251	12223	15.9733	22.0845
2R	scaffold1160.1	12974	15176	8.91411	11.64
2R	scaffold1160.1	15238	16229	7.15522	9.90279
3R	scaffold116.1	12876	16205	12.4868	12.8503
3R	scaffold116.1	18486	20856	16.2252	15.1937
3R	scaffold116.1	24707	25857	30.0527	33.4106
3R	scaffold116.1	26790	28857	78.0488	87.1739
3R	scaffold116.1	16328	17671	19.9439	17.952
3R	scaffold1161.1	8918	22716	49.7897	54.7573
2L	scaffold1162.1	19173	19793	19.7379	15.9255
2L	scaffold1162.1	15800	17838	18.1169	20.2042
3R	scaffold1163.1	9622	11158	13.0351	15.4469
3R	scaffold1163.1	11749	15078	50.1755	41.4943
3R	scaffold1163.1	18831	21651	22.0801	18.9049
3R	scaffold1163.1	22178	23094	8.83845	8.5812
3R	scaffold1163.1	16260	18773	25.9584	27.323
X	scaffold11645.1	263	948	7.72157	11.4124
3R	scaffold1165.1	53207	56043	18.1116	21.9204
3R	scaffold1165.1	56647	58122	34.169	39.6567
3R	scaffold1165.1	62418	63836	16.8959	15.162
3R	scaffold1165.1	64448	66241	30.418	29.9221
3L	scaffold1166.1	4749	9043	29.7682	21.5698
3L	scaffold1166.1	9503	10394	49.5712	48.5703
3L	scaffold1166.1	20678	22694	19.9139	19.0912
3L	scaffold1166.1	34453	37580	23.2421	18.0523
3L	scaffold1166.1	12282	18336	24.4534	29.9566
3R	scaffold1167.1	46247	47273	17.837	17.9778
3R	scaffold1167.1	49658	61457	544.432	590.682
3R	scaffold1167.1	28	27992	45.1372	38.7738
2R	scaffold1168.1	727	2757	9.77299	7.33503
2R	scaffold1168.1	3706	4798	77.9106	62.4128
2R	scaffold1168.1	4002	5095	16.6788	22.7884
2R	scaffold1168.1	7230	8016	46.9079	46.804
2R	scaffold1168.1	17935	20347	122.343	135.564
2R	scaffold1168.1	21388	21954	3.56141	9.5996
2R	scaffold1168.1	8446	16849	66.5695	56.1564
3L	scaffold1169.1	450	2082	90.4077	135.838
3L	scaffold1169.1	2350	8303	18.2649	15.7201
3L	scaffold1169.1	8712	9763	22.7062	21.1558
3L	scaffold1169.1	9836	11284	76.9636	172.841
3L	scaffold1169.1	19475	20589	21.7387	18.0972
X	scaffold1170.1	1190	22748	37.8731	35.7348
X	scaffold1171.1	277	1402	336.562	300.45
X	scaffold1171.1	2607	3529	8.46703	10.2357
X	scaffold1171.1	18033	23203	48.8127	43.501
3L	scaffold1172.1	543	10832	23	25.7051
3L	scaffold1172.1	10948	13173	37.7596	42.9032
3L	scaffold1172.1	13410	15634	35.4552	30.7438
3L	scaffold1172.1	23436	24262	86.6923	63.9488
3L	scaffold1172.1	26732	27761	723.041	829.459
3L	scaffold1172.1	28022	30835	22.8035	31.7071
3L	scaffold1172.1	33170	34209	45.145	46.2017
3L	scaffold1172.1	32629	33292	13.6494	12.2831
3L	scaffold1175.1	19187	19884	9.01413	8.22663
3L	scaffold1175.1	20977	21592	14.3636	14.2241
3L	scaffold1175.1	472	17960	17.2677	15.1011
3L	scaffold1176.1	3540	5342	103.985	110.679
3L	scaffold1176.1	6635	8280	26.4642	22.7608
2L	scaffold1178.1	10426	11343	36.938	40.6156
2L	scaffold1178.1	24363	29206	46.0562	42.4072
3R	scaffold1180.1	20749	22718	19.3449	18.5156
3R	scaffold1180.1	23092	23782	17.9576	14.3422
3R	scaffold1180.1	11719	17046	26.6786	28.8284
3R	scaffold1180.1	27657	35464	18.1901	17.4207
3R	scaffold1183.1	781	2673	21.5452	25.366
3R	scaffold1183.1	2773	6460	24.2497	26.6819
3R	scaffold1183.1	10663	15063	7.69045	11.8333
3R	scaffold1184.1	21603	28558	38.0818	43.4357
X	scaffold1186.1	10	1144	10.5636	13.832
X	scaffold1186.1	3571	4274	179.192	201.538
X	scaffold1186.1	5458	6384	322.394	362.116
X	scaffold1186.1	7255	8337	21.3446	20.4658
X	scaffold1186.1	12062	12718	848.229	808.909
2L	scaffold11861.1	42	1465	20.5388	15.5346
X	scaffold1187.1	1	5031	40.5558	45.8475
X	scaffold1187.1	5462	9949	13.4266	13.3175
X	scaffold1187.1	10144	13082	20.7971	17.977
X	scaffold1187.1	24401	25210	9.45465	7.42863
X	scaffold1187.1	35206	35755	13.8874	17.4184
X	scaffold1187.1	37828	40030	9.0272	9.60256
X	scaffold1187.1	40376	42404	9.27789	11.1583
X	scaffold1187.1	42491	44031	7.96792	10.2602
X	scaffold1187.1	51199	54219	14.2698	10.4421
X	scaffold1187.1	26598	34616	22.626	22.9859
X	scaffold1187.1	44445	50586	26.8685	23.1933
2L	scaffold1188.1	1286	2912	38.6687	33.3374
2L	scaffold1188.1	8536	9467	172.902	160.221
2L	scaffold1188.1	16780	20259	20.0819	17.8265
2L	scaffold1188.1	20521	22258	13.0497	10.7276
2L	scaffold1188.1	15451	16431	23.9831	20.9391
3L	scaffold1190.1	895	2849	7.78218	12.3109
3L	scaffold1190.1	7233	8855	13.3277	10.3489
3L	scaffold1190.1	10124	13640	67.0313	83.9865
3L	scaffold1190.1	18509	19456	9.64164	8.44244
3L	scaffold1190.1	19691	21641	157.996	111.381
3L	scaffold1190.1	29268	31743	39.2479	34.2011
3L	scaffold1190.1	15150	17495	33.8386	28.8803
2R	scaffold1192.1	36407	39276	233.483	218.325
2R	scaffold1192.1	39688	40554	11.9327	9.85878
2R	scaffold1192.1	32405	33927	7.24857	11.3891
3L	scaffold1193.1	11092	12518	10.1594	10.7888
3L	scaffold1193.1	17560	18679	11.0657	6.93749
2R	scaffold1194.1	9833	11570	34.4601	26.9308
2L	scaffold1199.1	15762	22189	96.2566	90.5157
3R	scaffold120.1	19229	20306	27.337	26.2978
3R	scaffold120.1	21805	22837	26.2319	22.682
3R	scaffold120.1	24849	25990	17.9352	16.9366
3R	scaffold120.1	46255	54464	12.1859	11.5728
3L	scaffold1201.1	1387	4279	29.864	32.4758
2L	scaffold12011.1	1121	2799	22.0774	19.9748
3L	scaffold1202.1	5835	7440	9.36426	12.8074
3L	scaffold1202.1	7623	14241	14.211	13.3541
3L	scaffold1202.1	20166	21362	54.1639	79.9836
3L	scaffold1202.1	21905	22418	10.0802	8.12295
3L	scaffold1204.1	14578	22432	53.5543	52.0732
3R	scaffold1207.1	7348	13582	21.1301	18.7256
3R	scaffold1207.1	34044	35456	18.7001	14.6968
3R	scaffold1207.1	40323	42643	524.948	531.087
3R	scaffold1207.1	44118	45843	1025.59	989.261
3R	scaffold1207.1	46613	48474	9.29481	13.123
X	scaffold1209.1	21939	22663	16.2126	16.3463
X	scaffold1209.1	22702	30407	13.5251	13.2479
2L	scaffold1211.1	4897	5849	10.3826	11.2704
2L	scaffold1211.1	12844	13439	12.332	9.17786
2L	scaffold1211.1	22842	23413	20.3903	12.3005
3L	scaffold1213.1	2170	6052	20.8389	15.4442
3L	scaffold1213.1	16501	19462	208.63	194.495
3L	scaffold1213.1	20965	23627	70.5899	71.4353
3L	scaffold1213.1	9611	18157	315.753	276.505
2R	scaffold1214.1	693	1386	63.7712	59.2902
2R	scaffold1214.1	3250	13948	45.032	42.5627
2R	scaffold1214.1	16826	18101	17.353	16.4739
2R	scaffold12144.1	80	863	16.6753	19.279
3L	scaffold12190.1	1	596	10.4326	10.2469
X	scaffold1219.1	8778	12276	12.8831	10.5646
X	scaffold1219.1	13624	22685	51.3756	40.2459
X	scaffold1221.1	8191	13740	45.0499	48.4914
X	scaffold1221.1	19317	20543	14.2589	12.107
X	scaffold1221.1	20616	22659	12.078	11.5384
X	scaffold1221.1	13800	16554	29.1932	25.7923
X	scaffold1223.1	751	1997	7.30593	9.3386
X	scaffold1223.1	3989	5646	668.481	718.742
X	scaffold1223.1	28674	30624	12.3036	24.3311
2R	scaffold1224.1	35859	41411	17.0128	19.8725
2R	scaffold1224.1	32020	34866	18.2227	22.4216
3R	scaffold1225.1	17788	25549	40.8368	36.3098
3R	scaffold1225.1	34	16923	79.6021	69.6991
2R	scaffold1226.1	2052	3647	13.3823	14.7824
2R	scaffold1226.1	4130	5949	11.7098	11.3062
2R	scaffold1226.1	6223	9786	151.664	133.92
2R	scaffold1226.1	10057	23936	196.041	176.267
3R	scaffold1229.1	12325	18528	31.6066	26.7745
3L	scaffold1230.1	3494	5630	19.787	20.0989
3L	scaffold1230.1	5879	7091	13.9488	14.5221
3L	scaffold1230.1	11259	11941	32.194	33.0424
3L	scaffold1230.1	12877	13658	27.0534	23.221
3L	scaffold1230.1	13964	15300	681.284	812.81
3L	scaffold1232.1	3088	6809	8.66466	8.99917
3L	scaffold1232.1	11766	12694	16.8874	9.18779
3L	scaffold1232.1	14743	24296	43.9815	46.3126
3R	scaffold1233.1	14856	15877	18.8331	20.689
3R	scaffold1233.1	16727	18363	31.3084	63.7644
3R	scaffold1233.1	18547	21747	22.6215	21.2776
3R	scaffold1233.1	22014	23304	12.2493	10.8761
3R	scaffold1233.1	23471	24358	153.698	146.523
3R	scaffold1233.1	24484	26322	20.6087	19.4368
3R	scaffold1233.1	26385	27095	15.1283	15.5975
3R	scaffold1233.1	28750	30920	184.349	199.741
3R	scaffold1233.1	38092	39009	10.3404	9.03034
3R	scaffold1233.1	40007	40704	13.3536	11.5916
3R	scaffold1233.1	40765	45066	11.7987	10.3832
3R	scaffold1233.1	15943	16653	19.5779	17.3843
3R	scaffold1233.1	31834	33237	15.1985	16.5129
3R	scaffold1233.1	49029	59260	12.8066	9.3568
2R	scaffold1235.1	1045	4200	20.3729	23.6745
2R	scaffold1235.1	7507	10478	15.0656	16.0623
2R	scaffold1235.1	15262	16172	8.73708	8.55105
2R	scaffold1235.1	16865	21044	32.7548	32.3671
2R	scaffold1235.1	22554	24689	15.8522	14.2921
2R	scaffold1235.1	24981	26239	56.7258	51.6599
2L	scaffold1236.1	2167	3962	6.9872	12.111
2L	scaffold1236.1	5038	6010	7.03199	13.9201
2L	scaffold1236.1	20669	22234	31.9973	32.8631
2L	scaffold12371.1	24	1126	17.1602	14.6316
3R	scaffold1238.1	5583	6340	19.8787	13.4515
3R	scaffold1238.1	6069	6722	7.07278	11.3522
3R	scaffold1238.1	12060	13965	402.338	409.471
3R	scaffold1238.1	16656	18064	340.812	331.033
3R	scaffold1238.1	18318	20446	8.06052	10.2621
3R	scaffold1238.1	21257	22111	113.981	121.785
3R	scaffold1238.1	25224	27980	8.00341	7.21401
3R	scaffold1238.1	29095	30616	11.1138	13.2915
3R	scaffold1238.1	31354	33349	8.99032	8.87215
2R	scaffold1240.1	5507	7073	12.1015	16.2472
2R	scaffold1240.1	46258	46889	8.88245	4.6195
2R	scaffold1240.1	9203	25803	20.0026	19.4217
2R	scaffold1240.1	27211	44061	24.5615	16.5242
3R	scaffold124.1	9071	10434	9.44196	9.13506
3R	scaffold124.1	10493	11410	14.0873	16.2511
3R	scaffold124.1	14819	19749	27.5011	32.5184
3L	scaffold1242.1	5212	11652	22.854	23.1443
3L	scaffold1242.1	12380	13494	2.71314	11.8489
X	scaffold1245.1	94	2540	12.0244	9.15164
X	scaffold1245.1	10124	15019	9.33426	14.1849
X	scaffold1245.1	16492	21704	10.1841	16.7151
2L	scaffold12459.1	161	2013	40.3864	38.1679
3R	scaffold1246.1	12231	15443	192.799	177.297
3R	scaffold1246.1	17535	20381	159.778	155.255
3R	scaffold1246.1	15695	16930	32.4287	31.2761
3R	scaffold1246.1	16343	18520	12.536	13.486
X	scaffold1248.1	1259	5158	14.7584	15.2762
X	scaffold1248.1	5702	8107	18.7247	15.793
X	scaffold1248.1	10773	12861	43.9192	46.0814
X	scaffold1248.1	13190	15682	56.5876	73.7841
X	scaffold1248.1	22924	30450	36.3995	43.012
X	scaffold1248.1	15896	20892	29.9828	26.4421
2R	scaffold1249.1	18086	19682	52.9934	46.6387
3L	scaffold125.1	52377	64012	54.6671	57.677
3L	scaffold125.1	69874	74690	13.5518	11.646
3L	scaffold125.1	45623	51031	17.0054	14.8906
2L	scaffold1251.1	7173	8568	25.2427	29.0101
2L	scaffold1251.1	9707	11542	67.6232	64.2103
2L	scaffold1251.1	27005	27578	19.1142	22.3488
2L	scaffold1251.1	33947	34584	9.05212	11.7112
2L	scaffold1251.1	12681	22227	20.1763	20.6104
2L	scaffold1251.1	44030	49614	18.8123	17.7292
3R	scaffold1253.1	719	5035	220.735	239.881
3R	scaffold1253.1	21530	25338	25.5536	25.8919
3R	scaffold1253.1	24798	26286	19.6971	10.791
3R	scaffold1253.1	29447	31785	16.5959	18.4963
3R	scaffold1253.1	33992	37695	22.5905	18.684
3R	scaffold1253.1	12079	21465	25.8832	24.4729
X	scaffold12541.1	17	847	37.2524	36.446
2L	scaffold1255.1	23069	23785	12.3783	17.6992
2R	scaffold1257.1	655	3611	204.492	212.835
2R	scaffold1257.1	20543	29413	29.869	29.5392
2R	scaffold1257.1	29896	30605	11.5044	9.25201
2R	scaffold1257.1	7663	20461	28.3442	30.8286
X	scaffold1259.1	1020	5802	10.0821	8.89523
2L	scaffold12655.1	543	1175	15.4584	14.0707
2L	scaffold12655.1	1340	1989	25.7852	21.5053
2L	scaffold1270.1	314	1243	58.2071	46.9334
2R	scaffold1271.1	17063	22171	16.1342	15.9326
3L	scaffold1272.1	10818	13581	51.5009	58.8848
2R	scaffold1277.1	4085	29754	19.2769	17.0692
2R	scaffold1278.1	10908	12494	28.7843	22.4432
2R	scaffold1278.1	12884	14087	16.4004	15.0125
2R	scaffold1279.1	6189	7090	11.3876	8.08989
2R	scaffold1279.1	7344	9785	57.4859	53.7487
2R	scaffold1279.1	13121	14526	9.82132	10.9003
2R	scaffold1279.1	16695	21262	202.384	200.341
2R	scaffold1279.1	33330	34703	9.1009	9.40818
2R	scaffold1279.1	15225	16530	241.296	253.372
4	scaffold1280.1	450	3296	35.9092	35.6257
4	scaffold1280.1	3479	5072	10.2058	9.10059
4	scaffold1280.1	5990	9463	11.7658	13.3426
4	scaffold1280.1	25389	26293	19.3044	17.1543
2R	scaffold1281.1	1	2619	117.855	107.065
2R	scaffold1281.1	2659	10624	12.3989	11.9142
2R	scaffold1281.1	11018	12013	13.0432	12.7417
X	scaffold1283.1	17	1029	11.4338	10.6421
X	scaffold1283.1	3251	7492	65.9206	71.2254
X	scaffold1283.1	9517	14603	183.064	180.887
X	scaffold1283.1	14813	15726	162.995	162.411
X	scaffold1283.1	19478	23212	31.7422	34.7392
3R	scaffold1285.1	3338	4842	108.805	98.7014
3L	scaffold1286.1	9460	11544	49.2255	42.8487
3L	scaffold1286.1	11944	14072	67.328	59.28
3L	scaffold1288.1	1	632	50.7838	66.9389
3L	scaffold1288.1	10397	11153	5.69583	10.3447
3L	scaffold1288.1	13149	14898	15.8912	19.2118
3L	scaffold1288.1	24757	29333	9.3074	16.2417
2R	scaffold1290.1	4106	5421	17.5864	17.808
2R	scaffold1290.1	6749	11392	53.2564	51.0414
2R	scaffold1290.1	13642	14781	11.3314	13.1361
2R	scaffold1290.1	15237	15946	15.7906	12.3449
2R	scaffold1290.1	18614	24527	52.4931	47.3788
3R	scaffold129.1	4	776	18.5866	15.3939
3R	scaffold129.1	825	4068	15.9962	14.848
3R	scaffold129.1	38346	42044	67.3196	55.6725
3R	scaffold129.1	89356	90896	431.894	530.36
3R	scaffold129.1	100260	103901	67.0534	62.7233
3R	scaffold129.1	104959	105912	13.5448	15.0716
3R	scaffold129.1	107694	113023	327.186	354.669
3R	scaffold129.1	125370	127170	16.1319	10.812
3R	scaffold129.1	4141	19039	11.0083	11.144
2L	scaffold1297.1	707	13396	75.799	66.5743
2L	scaffold1297.1	11699	14683	54.5204	46.7564
2R	scaffold1299.1	621	2390	9.04225	8.20718
2R	scaffold1299.1	5282	6033	57.6181	50.5867
2R	scaffold1299.1	6159	9185	26.533	23.9362
2R	scaffold1299.1	9602	10397	53.2623	91.8174
2R	scaffold1299.1	10461	12374	24.5132	22.497
2R	scaffold1299.1	12965	14208	9.2755	8.7883
2R	scaffold1299.1	15977	21920	20.8756	15.6239
2R	scaffold1300.1	38237	39057	14.5203	11.5834
2R	scaffold1300.1	29698	38070	37.2426	34.8734
3L	scaffold130.1	958	2113	12.3194	10.346
3L	scaffold130.1	17829	18366	9.53359	8.32639
3L	scaffold130.1	50267	51165	9.96811	10.1517
3L	scaffold130.1	51952	55451	11.8513	11.946
3L	scaffold130.1	57687	59532	7.76843	7.89927
3L	scaffold130.1	60102	61751	8.23402	9.21394
3L	scaffold130.1	21239	49549	21.1066	21.7717
X	scaffold1302.1	9473	11103	16.4868	16.836
X	scaffold1302.1	10954	12264	717.471	864.103
X	scaffold1302.1	18042	18901	13.6141	10.7603
X	scaffold1302.1	19636	22083	54.1188	51.4863
X	scaffold1302.1	22210	23747	22.5874	21.09
X	scaffold1302.1	23617	28140	863.878	779.292
X	scaffold1302.1	29424	31035	10.9912	9.753
X	scaffold1302.1	15680	17293	393.126	350.843
3R	scaffold1303.1	2454	3527	242.484	195.757
3R	scaffold1303.1	3278	4478	32.7206	25.1908
3R	scaffold1303.1	10007	12145	22.71	16.7663
3R	scaffold1303.1	20026	25512	31.6554	31.7887
3R	scaffold1303.1	13179	16684	12.8358	11.6983
3R	scaffold1305.1	1	2311	48.3	45.2474
3R	scaffold1305.1	11443	20447	58.5064	56.9267
X	scaffold1307.1	1	1795	49.8193	50.3601
X	scaffold1307.1	1860	28917	34.4909	32.16
3L	scaffold1308.1	4476	5222	10.205	9.5899
3L	scaffold1308.1	7295	8199	10.9177	12.7128
3L	scaffold1308.1	9302	12577	44.8126	43.795
3L	scaffold1308.1	12746	15655	33.6443	33.5261
3L	scaffold1308.1	17454	20929	18.8669	19.8627
X	scaffold1310.1	19166	21352	5.72141	6.64334
X	scaffold1310.1	14315	17096	13.0655	14.5638
3L	scaffold131.1	25005	26343	45.6632	36.3599
3L	scaffold131.1	26434	28010	17.9545	16.9553
3L	scaffold131.1	28165	30506	11.883	11.3284
3L	scaffold131.1	30570	32060	20.3647	23.3051
3L	scaffold131.1	42658	43269	9.47531	3.9533
3L	scaffold131.1	52794	57740	43.1756	47.9657
3L	scaffold131.1	58599	63889	28.6999	32.3413
3L	scaffold131.1	801	17353	60.4143	53.9722
3L	scaffold131.1	32150	37614	12.3515	9.95518
3L	scaffold1311.1	4957	6813	24.6626	21.194
3L	scaffold1311.1	7142	21069	116.009	128.263
2L	scaffold1312.1	7827	13320	27.9545	28.9842
2L	scaffold1312.1	16649	18024	10.4581	8.35142
3L	scaffold1313.1	8476	9449	32.5237	26.0377
3L	scaffold1313.1	10477	11762	12.0106	11.7064
3L	scaffold1313.1	18401	19409	8.74071	8.97528
3L	scaffold1313.1	22365	28626	10.4591	11.506
3L	scaffold1313.1	11993	18023	15.8978	16.198
3R	scaffold1315.1	29045	29742	9.73256	7.40397
2R	scaffold1316.1	23	2179	158.722	163.893
2R	scaffold1316.1	2450	3009	21.6115	14.8836
2R	scaffold1316.1	3287	6238	18.3085	17.9591
2R	scaffold1316.1	8747	13302	20.7438	19.0505
2R	scaffold1316.1	16641	19185	26.7106	23.4885
2R	scaffold1316.1	19252	19878	14.3776	17.9413
2R	scaffold1317.1	35284	39868	19.1543	17.8289
2R	scaffold1317.1	9382	27014	11.9716	11.6015
2R	scaffold1317.1	46836	59788	40.2842	49.7267
2R	scaffold1319.1	4327	5632	10.2332	11.5495
2R	scaffold1319.1	8146	8759	8.9934	8.93304
2L	scaffold1321.1	14239	15887	11.1463	6.39524
2L	scaffold1321.1	26135	27304	8.81798	8.64492
3L	scaffold1325.1	848	2035	9.91387	7.97963
3L	scaffold1325.1	3298	8347	11.4218	15.2847
3L	scaffold1325.1	10200	20095	15.4615	17.1342
2L	scaffold1326.1	321	6881	37.7529	35.0967
2L	scaffold1326.1	7746	8506	15.7947	16.1056
2L	scaffold1326.1	17439	20039	191.553	180.855
2L	scaffold1326.1	19619	20247	92.658	82.797
2L	scaffold1329.1	17656	23423	12.2076	10.0103
2L	scaffold1329.1	23780	25041	15.2807	11.858
2L	scaffold1329.1	25095	26731	20.6515	18.1276
2L	scaffold1329.1	33810	36704	12.1174	11.2737
2L	scaffold1329.1	37565	40542	18.9769	16.2221
2L	scaffold1329.1	41247	48510	82.0434	77.876
2L	scaffold1329.1	51530	52445	8.69888	11.8908
2L	scaffold1329.1	52527	54439	9.00621	10.8019
2L	scaffold1329.1	54864	58000	51.6729	48.1449
2L	scaffold1329.1	3550	17019	46.7398	45.0789
2L	scaffold1329.1	48805	50702	13.8638	15.0331
2R	scaffold1330.1	2133	11771	16.6748	16.3591
2R	scaffold1331.1	3639	10173	307.228	323.57
2R	scaffold1331.1	12778	13378	105.866	149.956
3R	scaffold1334.1	1281	2515	1994.84	2530.57
3R	scaffold1334.1	4506	9214	14.4505	16.221
3R	scaffold1334.1	9937	10781	11.0329	13.2206
3R	scaffold1334.1	18012	20961	10.8965	11.9234
4	scaffold1336.1	754	8978	56.6489	45.4841
4	scaffold1336.1	35724	36595	8.86926	7.62243
4	scaffold1336.1	36982	37970	18.9311	19.5865
4	scaffold1336.1	40081	40692	21.5707	24.9884
4	scaffold1336.1	28012	34420	51.1126	48.5336
3R	scaffold1337.1	16383	22578	12.1779	10.6604
X	scaffold1338.1	23428	25317	58.7068	57.7466
X	scaffold1338.1	49	17865	111.952	115.072
3R	scaffold1339.1	17266	20657	8.28329	13.7575
2L	scaffold1340.1	2263	2993	190.491	191.602
2L	scaffold1340.1	3283	6694	280.074	291.606
2L	scaffold1340.1	7708	9171	15.3171	16.139
2L	scaffold1340.1	15117	16237	9.3192	8.39291
2L	scaffold1340.1	17195	18686	23.3861	23.2405
3R	scaffold134.1	987	1538	50.8122	41.8137
3R	scaffold134.1	1986	2863	37.7797	33.6849
3R	scaffold134.1	2929	4229	21.4904	20.3392
3R	scaffold134.1	6577	9392	11.361	12.8064
3R	scaffold134.1	9463	10454	9.71991	11.9641
3R	scaffold134.1	11501	12096	15.1901	17.467
3R	scaffold134.1	30662	31788	226.682	172.572
3R	scaffold134.1	59898	61220	32.4003	36.255
3R	scaffold134.1	61275	62197	23.6813	28.1671
3R	scaffold134.1	76221	80878	23.834	19.5437
3R	scaffold134.1	82938	84246	8.88048	8.6743
3R	scaffold134.1	85195	90722	12.8577	11.4506
3R	scaffold134.1	91568	92780	36.286	40.8911
3R	scaffold134.1	32233	46693	9.98813	14.9633
3R	scaffold134.1	48036	50422	15.9283	19.4974
3R	scaffold134.1	65263	66966	10.7533	8.93005
3R	scaffold134.1	80970	82084	14.3931	16.1357
2L	scaffold1341.1	4752	5380	21.886	24.3038
2L	scaffold1341.1	5809	10686	22.1104	29.4882
2L	scaffold1341.1	21049	24602	24.1952	22.7241
2L	scaffold1341.1	11455	18781	58.8203	49.2722
3R	scaffold1342.1	3728	8874	220.861	205.176
3R	scaffold1342.1	9371	10304	56.4663	85.4677
3R	scaffold1342.1	34094	38687	8.43053	9.00034
3R	scaffold1342.1	70470	71164	9.9949	10.0166
3R	scaffold1342.1	39113	57737	15.9228	14.6104
3R	scaffold1343.1	30021	31533	17.0627	16.5509
3R	scaffold1343.1	171	27947	14.9073	12.8079
3L	scaffold1345.1	11047	11679	10.288	7.19154
3L	scaffold1345.1	12254	14397	16.191	13.9907
3L	scaffold1345.1	13697	14804	17.5174	19.5248
3L	scaffold1345.1	15786	16874	1903.81	2393.31
X	scaffold1346.1	28	1052	23.4898	25.4543
X	scaffold1346.1	3422	5208	44.1088	52.7032
X	scaffold1346.1	5680	10450	167.571	163.286
X	scaffold1346.1	19372	21175	89.536	101.395
X	scaffold1346.1	12671	18787	65.2296	60.4977
3R	scaffold1347.1	7728	8421	19.7543	18.5394
3R	scaffold1347.1	25340	26752	16.4685	22.3941
3R	scaffold1347.1	9504	24989	30.2405	36.7715
3R	scaffold1347.1	26831	35446	17.7877	20.2832
2L	scaffold13476.1	1	760	69.6934	71.3216
3L	scaffold1349.1	1709	3665	10.6027	12.3966
3L	scaffold1349.1	3994	5936	10.5398	10.0413
3L	scaffold1349.1	7103	9412	33.2335	53.9312
3L	scaffold1349.1	9472	17117	21.6111	20.4054
3R	scaffold1350.1	258	769	28.2915	33.5274
3R	scaffold1350.1	7248	8489	36.0059	34.9037
3R	scaffold1350.1	8756	9532	581.862	499.142
3R	scaffold1350.1	9982	11559	30.9627	37.484
3R	scaffold1350.1	12088	15579	62.3856	60.7884
3R	scaffold1350.1	20807	21550	7.00248	14.1411
3L	scaffold135.1	61215	61906	16.3009	9.14482
3L	scaffold135.1	61970	62838	19.0127	15.5117
3L	scaffold135.1	62900	63450	68.2757	65.1871
3L	scaffold135.1	63788	64641	94.2861	80.7351
3R	scaffold1351.1	56152	61662	8.26879	6.92081
3R	scaffold1351.1	68565	69370	10.3116	8.89894
3R	scaffold1352.1	2661	5255	19.2012	17.2453
3R	scaffold1352.1	10679	15074	25.4471	24.2887
3R	scaffold1352.1	16108	17658	23.5113	24.7689
2L	scaffold1353.1	5	14140	23.4938	20.495
2L	scaffold1353.1	32303	32981	39.4099	29.092
3R	scaffold1354.1	20091	21235	17.9039	11.8257
2R	scaffold1356.1	2333	3398	10.3918	11.1335
2R	scaffold1356.1	15418	16911	17.7439	20.1087
X	scaffold1357.1	6391	7132	23.722	19.8738
X	scaffold1357.1	7770	13594	193.843	221.61
X	scaffold1357.1	19995	21031	13.8224	9.97049
3R	scaffold1360.1	528	2205	9.85527	10.67
3R	scaffold1360.1	2279	3215	23.8641	23.4987
3R	scaffold1360.1	16112	17228	60.9602	49.116
3R	scaffold1362.1	28653	32279	20.1461	21.5527
2R	scaffold1363.1	4108	6776	39.034	31.4382
2R	scaffold1363.1	18082	18832	29.1717	34.3151
X	scaffold1365.1	5164	11730	14.9508	14.3969
X	scaffold1365.1	13557	14514	42.3818	44.363
2L	scaffold1366.1	11202	13358	13.4512	11.3774
2L	scaffold1366.1	13971	14931	161.682	151.338
2L	scaffold1366.1	30004	30770	11.8276	13.5299
2L	scaffold1366.1	31300	32209	30.3711	25.2176
2L	scaffold1367.1	822	4779	32.0773	31.8965
2L	scaffold1367.1	5774	7134	17.8756	17.7498
2L	scaffold1367.1	9271	11507	8.4868	10.1934
2L	scaffold1367.1	12440	13303	7.46143	9.19638
2L	scaffold1367.1	14127	15239	11.1316	13.576
2L	scaffold1367.1	20597	21405	13.3893	17.563
2L	scaffold1367.1	16125	18274	15.6917	17.725
2R	scaffold137.1	1575	3194	1388.31	1457.21
2R	scaffold137.1	4965	5839	46.2356	43.3804
2R	scaffold137.1	7839	9106	11.9892	10.3862
2R	scaffold137.1	23143	23678	13.2832	10.4839
2R	scaffold137.1	15412	22683	7.63599	7.35831
2R	scaffold137.1	35583	50242	28.1689	26.3104
2R	scaffold137.1	66171	98554	212.705	201.323
X	scaffold1371.1	1021	1754	8.53617	9.56912
X	scaffold1371.1	2382	6833	17.6169	14.2685
X	scaffold1371.1	7110	9734	20.6908	22.8284
X	scaffold1371.1	12745	13724	15.8089	16.2655
X	scaffold1371.1	14609	16757	14.3352	13.5942
X	scaffold1372.1	2270	3514	10.8954	9.00907
X	scaffold1372.1	4111	4915	13.4517	14.6638
X	scaffold1372.1	5275	5951	12.3759	11.1822
X	scaffold1372.1	6251	7951	17.4885	16.6369
2R	scaffold1375.1	2644	4853	1935.84	1673.93
2R	scaffold1375.1	18483	22344	17.0155	11.5856
2R	scaffold1375.1	41461	43550	160.378	152.805
2R	scaffold1375.1	45081	46967	16.8234	22.5462
2R	scaffold1375.1	47030	48578	15.3364	21.0098
3R	scaffold1376.1	2011	4678	13.9478	10.7485
3R	scaffold1376.1	9952	12121	13.3442	11.6682
3R	scaffold1376.1	12604	13713	444.522	366.59
3R	scaffold1376.1	19285	20126	10.1246	8.73004
2L	scaffold1377.1	48	2681	32.7711	34.409
2L	scaffold1378.1	2595	9266	910.703	901.077
2L	scaffold1378.1	10210	27393	15.3274	15.8838
3L	scaffold1379.1	1	2962	46.7792	44.2862
3L	scaffold1379.1	3657	5165	10.1547	10.8517
3L	scaffold1379.1	7593	11361	80.23	93.4447
3L	scaffold1379.1	25173	28905	15.9535	14.5693
3R	scaffold138.1	16560	22760	11.6721	10.9385
3R	scaffold138.1	22888	24942	13.8863	12.0212
3R	scaffold138.1	68234	70422	14.3488	25.7737
3R	scaffold138.1	71197	71944	10.5983	6.65933
3R	scaffold138.1	73656	76038	10.8829	9.2616
3R	scaffold138.1	76521	78913	9.56305	7.44311
3R	scaffold138.1	85203	89996	25.5071	22.677
3R	scaffold138.1	90302	91705	45.7827	44.0672
3R	scaffold138.1	94036	94598	11.3071	8.35296
3R	scaffold138.1	111500	113419	29.4115	28.7008
3R	scaffold138.1	116187	123223	5.92873	8.85586
3R	scaffold138.1	123282	124584	23.0456	26.6295
3R	scaffold138.1	125655	126869	7.97756	8.74468
3R	scaffold138.1	31323	66271	10.8531	16.4728
3R	scaffold138.1	95213	98782	112.55	134.232
X	scaffold1382.1	744	2042	14.5632	12.6183
X	scaffold1382.1	3751	5561	114.334	90.0531
X	scaffold1382.1	11211	23223	100.019	105.759
X	scaffold1383.1	13507	23556	22.1172	20.2571
2L	scaffold1384.1	6899	13039	15.7839	14.5602
2L	scaffold1384.1	14626	15763	15.3295	16.1265
2L	scaffold1384.1	19136	21273	15.0943	10.3807
2L	scaffold1384.1	16226	18102	11.7431	12.5976
3L	scaffold1385.1	1	2405	12.4852	15.927
3L	scaffold1385.1	2670	13705	18.1855	21.4559
2R	scaffold1386.1	9560	20871	35.4821	43.6905
3R	scaffold1387.1	9555	10056	30.863	36.2143
3R	scaffold1387.1	19027	20702	27.9499	31.0476
3R	scaffold1388.1	21298	23032	16.6387	18.097
3R	scaffold1388.1	23104	24866	11.7278	12.7695
3R	scaffold1388.1	25023	26293	276.532	268.154
3R	scaffold1388.1	27037	29176	11.1849	12.2243
2L	scaffold1389.1	701	3684	7.62458	8.21907
2L	scaffold1389.1	3754	6229	18.1416	17.3006
2L	scaffold1389.1	7781	10469	9.57415	8.77623
2L	scaffold1389.1	53429	54341	10.1722	7.03386
3R	scaffold139.1	25029	26368	11.4817	12.2993
3R	scaffold139.1	54722	56371	45.7159	50.7774
3R	scaffold1392.1	2928	4411	11.0876	9.97271
3R	scaffold1392.1	7280	7788	43.8808	37.6599
3R	scaffold1392.1	16426	17254	45.1241	40.3289
3R	scaffold1393.1	1	997	18.8801	16.5706
3R	scaffold1393.1	1485	2387	12.8867	13.4626
3R	scaffold1393.1	5454	7913	223.733	231.068
3R	scaffold1393.1	18686	27825	328.414	258.551
3R	scaffold1393.1	31563	33506	7.9154	9.7345
3R	scaffold1393.1	33599	52641	18.2366	16.4333
3L	scaffold1395.1	11291	14409	22.8706	24.1395
3L	scaffold1395.1	25135	26331	6.77421	9.86575
2L	scaffold1396.1	7922	8585	15.2741	9.08548
2L	scaffold1396.1	8950	9650	172.368	155.674
2L	scaffold1396.1	29754	30988	8.39714	9.97497
2L	scaffold1396.1	31048	31647	15.3356	10.9136
2L	scaffold1396.1	34545	35695	15.9548	12.959
2L	scaffold1396.1	10148	28117	24.9735	21.9303
3R	scaffold1397.1	11612	24172	21.4347	18.937
2R	scaffold1399.1	9020	13395	36.2979	29.6792
2R	scaffold1399.1	13467	25904	18.343	16.3932
2L	scaffold140.1	5727	11491	21.3424	22.1738
2L	scaffold140.1	11569	12728	18.7183	21.267
2L	scaffold140.1	23132	27834	12.9412	13.4508
2L	scaffold140.1	31871	32618	15.2285	13.5281
2L	scaffold140.1	33072	35098	12.5606	11.8894
2L	scaffold140.1	13391	23072	21.1881	19.9888
X	scaffold1401.1	418	9269	33.9958	32.7141
X	scaffold1401.1	10096	21111	22.1125	20.5978
2L	scaffold1403.1	5385	5966	1393.73	1451.01
2L	scaffold1403.1	14479	15191	16.3273	15.5177
2L	scaffold1403.1	16132	20626	24.6529	25.6668
X	scaffold1404.1	143	1812	321.654	413.22
X	scaffold1404.1	3096	3771	5.28229	10.2163
X	scaffold1404.1	6369	8252	35.8986	35.0923
3R	scaffold1406.1	16859	22565	14.0071	11.0093
3R	scaffold1406.1	15404	16763	14.7663	14.5259
X	scaffold14095.1	258	859	80.6042	79.1112
2L	scaffold14.1	20307	26851	27.7656	25.8636
2L	scaffold14.1	27893	28844	27.8947	37.489
2L	scaffold14.1	29241	30013	16.7016	16.0963
2L	scaffold14.1	41557	43034	11.5858	13.8272
2L	scaffold14.1	43741	45650	10.7813	15.5521
2L	scaffold14.1	46200	47562	10.9257	9.10989
2L	scaffold14.1	31864	37902	72.0051	114.566
2L	scaffold14.1	48992	50747	11.6194	9.92164
3R	scaffold141.1	9	1691	55.2266	50.638
3R	scaffold141.1	20003	28293	31.2007	31.2244
3R	scaffold141.1	40196	40989	458.552	499.27
3R	scaffold141.1	41055	42753	621.916	641.481
3R	scaffold141.1	45287	47014	18.5762	19.1821
3R	scaffold141.1	65959	67835	13.0238	11.0078
3R	scaffold141.1	66883	69142	14.9395	14.885
3R	scaffold141.1	71731	75355	152.243	166.522
3R	scaffold141.1	75555	79596	273.854	247.874
3R	scaffold141.1	3176	19144	44.1881	39.8697
3R	scaffold141.1	29582	36464	1594.94	1477.53
3R	scaffold141.1	47401	56403	272.797	251.29
3R	scaffold141.1	62414	65894	30.6614	50.423
3L	scaffold1411.1	860	2988	32.4247	33.3892
3L	scaffold1411.1	4779	5683	17.6449	14.3961
3L	scaffold1411.1	6810	7857	8.4893	9.13803
3L	scaffold1411.1	8748	10686	27.8329	21.7236
3L	scaffold1411.1	10995	11807	32.9123	24.3821
3L	scaffold1411.1	12823	13607	2023.14	2190.82
3L	scaffold1411.1	17229	18529	18.4329	17.5067
3L	scaffold1411.1	21907	22944	9.45462	10.2558
3L	scaffold1411.1	25626	26486	38.3501	37.9704
3L	scaffold1411.1	26560	27797	12.7956	17.1453
3L	scaffold1411.1	27908	29869	13.7731	10.8578
3L	scaffold1411.1	16300	17145	18.1753	16.198
3L	scaffold1411.1	31836	36357	23.9981	25.8646
2R	scaffold1412.1	226	1053	12.448	10.5258
2R	scaffold1412.1	8202	9312	13.5673	11.2439
2R	scaffold1412.1	9913	12880	12.4762	9.73469
2R	scaffold1412.1	16586	18419	20.8393	19.8294
2R	scaffold1412.1	18504	20636	23.5373	27.6086
2R	scaffold1412.1	14811	16530	19.0861	16.0357
4	scaffold1416.1	2399	4833	41.0325	39.6371
4	scaffold1416.1	7906	8884	18.1048	19.8345
4	scaffold1416.1	21775	23095	25.5068	22.86
4	scaffold1416.1	23692	25587	13.9339	11.559
4	scaffold1416.1	14955	18421	11.5127	13.5121
X	scaffold1417.1	1100	2668	21.7813	19.4786
X	scaffold1417.1	4257	8048	9.27736	10.0074
X	scaffold1417.1	8526	10416	16.6465	18.0251
X	scaffold1417.1	11340	12109	7.33423	9.54186
3R	scaffold1419.1	2171	3988	22.2496	22.3035
3R	scaffold1419.1	3497	4213	27.0123	31.4107
3R	scaffold1419.1	10599	12162	111.431	118.271
3R	scaffold1419.1	12397	17411	74.803	90.7789
3L	scaffold1421.1	1818	11376	124.959	133.688
3L	scaffold1421.1	18641	26406	102.928	126.928
3L	scaffold1421.1	39490	41004	37.8125	41.0647
3L	scaffold1421.1	41273	42939	36.1033	37.1854
3L	scaffold1421.1	28326	38955	33.6129	30.3281
3R	scaffold1423.1	8	3135	43.1239	43.2929
3R	scaffold1423.1	4692	8287	40.8063	49.398
3R	scaffold1423.1	8877	9701	21.1335	23.0442
3R	scaffold1423.1	11663	13039	18.5264	19.9461
X	scaffold1425.1	2673	8621	66.508	64.2187
X	scaffold1425.1	9679	10344	50.5724	39.6423
X	scaffold1425.1	11071	11834	9.32569	8.00721
X	scaffold1425.1	12374	13240	9.4755	7.7801
X	scaffold1425.1	14335	15006	10.675	9.31191
X	scaffold1425.1	19108	19896	8.66633	9.69228
X	scaffold1426.1	3	4493	16.1558	14.4378
X	scaffold1426.1	4707	6207	20.4106	21.1054
X	scaffold1426.1	9775	11055	21.8	23.4549
X	scaffold1426.1	19053	20859	18.3811	19.3777
X	scaffold1426.1	27934	29510	13.2278	14.2888
X	scaffold1426.1	29910	30691	22.1244	19.8299
X	scaffold1426.1	35837	38792	546.672	490.372
3R	scaffold1427.1	10499	12028	18.1031	21.8601
3R	scaffold1427.1	13004	15894	20.3462	25.8353
3R	scaffold1429.1	1640	4132	24.8325	27.8163
3R	scaffold1429.1	4733	5621	20.2765	21.5351
X	scaffold1430.1	945	3802	17.9397	27.6666
X	scaffold143.1	930	4055	12.3238	11.5495
X	scaffold143.1	4139	9878	13.0212	10.4731
X	scaffold143.1	36663	54890	14.5596	11.5869
3R	scaffold1432.1	9725	10935	13.574	19.1843
3R	scaffold1432.1	11215	16504	20.5988	16.1495
2L	scaffold1433.1	4682	6367	68.8594	71.6346
2L	scaffold1433.1	6900	15196	93.0116	89.0992
X	scaffold1434.1	7429	26900	58.8203	66.5506
3R	scaffold1436.1	3327	14263	13.7439	12.8047
3R	scaffold1436.1	17786	18468	9.0963	9.65827
3R	scaffold1437.1	1	33602	41.6629	48.1527
3R	scaffold1439.1	15845	16788	93.1824	111.093
3L	scaffold1444.1	558	9654	19.5219	20.3719
3L	scaffold1444.1	10425	14159	13.626	13.9119
3R	scaffold1445.1	2781	4744	7.9383	8.83369
3R	scaffold1445.1	12743	13702	107.891	93.531
3R	scaffold1445.1	15415	17625	28.0785	30.4621
2R	scaffold1449.1	1040	2835	10.6922	10.4252
2R	scaffold1449.1	16701	31733	46.6583	36.8088
2R	scaffold1449.1	34919	39508	35.1794	31.2967
2R	scaffold1449.1	40438	41215	74.4197	83.3702
2R	scaffold1449.1	32004	33601	279.918	325.761
2R	scaffold1449.1	44714	52544	273.215	231.289
3R	scaffold145.1	4152	6178	35.8181	37.9119
3R	scaffold145.1	22547	28153	44.5683	50.9827
3R	scaffold145.1	40686	44400	13.9386	12.7395
3R	scaffold145.1	7271	21453	48.5888	47.3369
3R	scaffold145.1	46228	58117	16.3235	16.3617
X	scaffold1451.1	4561	11543	12.7264	13.3119
X	scaffold1451.1	11739	12712	19.9323	21.3498
2L	scaffold1452.1	3168	5696	5.01037	22.4729
2L	scaffold1452.1	7709	10896	8.07246	32.5294
2L	scaffold1452.1	19741	20741	31.9541	37.3422
2R	scaffold1453.1	3944	5376	8.8032	7.71996
2R	scaffold1453.1	6552	9832	87.5693	90.4385
2R	scaffold1453.1	10847	12309	13.6548	10.2594
2R	scaffold1453.1	18255	19927	11.5782	11.3689
2R	scaffold1453.1	12800	17621	19.9715	18.1437
2L	scaffold1454.1	16585	22760	12.9743	12.9223
2L	scaffold1454.1	25815	26656	35.1542	33.9568
3R	scaffold14552.1	23	654	12.779	14.6573
X	scaffold1459.1	385	5345	19.4665	19.3456
X	scaffold1459.1	8414	10516	14.0426	15.9319
X	scaffold1459.1	10956	14634	95.4706	84.1865
3L	scaffold1467.1	1351	3035	26.8725	23.3517
3L	scaffold1467.1	4680	6060	16.5775	17.8676
3L	scaffold1467.1	6449	9635	18.9407	22.4029
3L	scaffold1467.1	13184	14387	12.1609	12.8526
3L	scaffold1467.1	14961	15809	19.6081	14.4069
X	scaffold1469.1	2030	4166	10.0793	8.41802
X	scaffold1469.1	4764	5832	9.74449	9.67834
X	scaffold1469.1	6066	7749	15.3012	17.8173
X	scaffold1469.1	8986	17226	22.8208	23.9627
2L	scaffold1471.1	429	4602	43.9655	39.2234
X	scaffold1472.1	66	1608	1348.61	1192.3
X	scaffold1472.1	3599	7210	24.0111	25.0271
X	scaffold1472.1	7699	11066	27.1098	27.9738
X	scaffold1472.1	12450	29341	36.6692	36.4144
3R	scaffold1474.1	25638	39630	10.4306	9.97351
X	scaffold1476.1	13502	15046	46.6857	49.5376
2R	scaffold1478.1	31	804	60.829	51.4663
2R	scaffold1478.1	6426	8426	16.1638	15.1915
2R	scaffold1478.1	8705	12019	8.25884	9.0961
2R	scaffold1478.1	12065	12792	9.54836	11.987
2R	scaffold1478.1	13415	15757	20.4716	19.763
2R	scaffold1479.1	12618	14989	39.331	39.3274
2R	scaffold1479.1	22273	23265	15.3857	9.00572
3R	scaffold1481.1	5374	6714	84.5279	80.7475
3R	scaffold1481.1	6779	7974	132.389	105.952
3R	scaffold1481.1	10086	20509	19.6124	18.4695
X	scaffold1482.1	1	891	88.3499	88.8975
X	scaffold1482.1	3408	5263	57.2197	53.7116
X	scaffold1482.1	7178	9481	325.332	326.354
X	scaffold1482.1	12472	30645	34.8469	32.523
3R	scaffold1485.1	2386	3613	28.0774	28.9968
3R	scaffold1485.1	6052	7432	8.67648	15.2636
3R	scaffold1485.1	6253	8329	4.57559	3.26274
2L	scaffold1486.1	6028	6925	60.7126	57.7077
2L	scaffold1486.1	7196	9835	15.7891	12.7419
2L	scaffold1486.1	22984	24686	96.0414	87.1852
2L	scaffold1486.1	26801	28094	106.097	89.0286
2L	scaffold1487.1	23865	24591	78.2683	78.8192
3R	scaffold1488.1	5450	12523	15.1194	15.7983
3L	scaffold1490.1	6079	7552	11.7465	14.2411
3R	scaffold149.1	23105	25227	13.0798	11.4922
3R	scaffold149.1	25905	28977	13.0997	12.105
3R	scaffold149.1	36196	36736	9.31898	8.62869
3R	scaffold149.1	75951	76612	50.6372	42.359
3R	scaffold149.1	76718	78521	8.87207	10.9429
3R	scaffold149.1	85696	89717	98.4974	112.821
3R	scaffold149.1	31504	34705	14.6178	13.8963
3R	scaffold149.1	63067	69642	20.9178	24.8466
3L	scaffold1492.1	2333	6903	14.1602	13.0813
3L	scaffold1492.1	3822	6903	8.92886	8.23627
3L	scaffold1492.1	17899	18414	19.6584	18.66
3L	scaffold1492.1	13452	16736	11.8854	10.4375
2R	scaffold1493.1	24	695	35.6295	38.5057
2R	scaffold1493.1	713	3186	15.5157	15.3436
2R	scaffold1493.1	7908	13054	4.26699	9.49415
X	scaffold1495.1	1213	8004	58.0854	58.2985
X	scaffold1495.1	23990	27166	200.725	184.435
X	scaffold1495.1	8957	20425	98.8258	63.0522
X	scaffold1495.1	27624	37763	13.0792	14.1695
3R	scaffold1500.1	4821	16136	44.5791	47.0988
3R	scaffold1500.1	19802	22173	33.1228	35.3783
3R	scaffold1500.1	23329	24139	41.5137	47.4458
3R	scaffold1500.1	24472	29140	52.1953	52.8256
3R	scaffold1502.1	15889	18969	19.3829	13.8173
3L	scaffold1503.1	29486	31678	9.89557	9.83751
3L	scaffold1503.1	31955	37868	13.9367	13.8122
2L	scaffold1504.1	6107	14225	77.1382	101.43
2L	scaffold1504.1	17932	20920	29.3046	31.148
2R	scaffold1505.1	9120	14922	60.8158	69.3145
3R	scaffold1506.1	817	3489	16.0015	20.9427
3R	scaffold1506.1	3547	4929	15.7512	15.4424
3R	scaffold1506.1	8004	15317	33.2193	29.1795
3R	scaffold1506.1	24674	26619	8.50572	10.9953
3R	scaffold1506.1	6291	21785	17.2818	17.893
3R	scaffold1508.1	37249	41152	276.961	257.118
3R	scaffold1508.1	47649	48594	16.8508	18.3927
3R	scaffold1508.1	51610	52413	15.1616	13.2945
3R	scaffold1512.1	2587	4006	14.076	15.0729
3R	scaffold1512.1	4299	5109	17.3604	17.5056
3R	scaffold1512.1	5176	12533	41.8999	36.1399
2L	scaffold1514.1	8441	9521	79.4418	95.1442
2L	scaffold1514.1	9710	10973	15.7699	14.4452
2L	scaffold1514.1	11833	13738	18.2936	12.7788
2L	scaffold1514.1	21332	27880	17.5413	11.3358
2L	scaffold1514.1	28117	29259	19.1081	19.1116
2L	scaffold1514.1	30185	32725	305.337	260.291
2L	scaffold1514.1	34093	36068	18.7685	16.838
2L	scaffold1514.1	36802	37595	172.827	163.073
2R	scaffold1519.1	1543	3442	16.786	17.2683
2R	scaffold1519.1	3704	5250	15.6617	14.8025
2R	scaffold1519.1	5855	14282	324.95	357.611
2R	scaffold1519.1	17755	23578	63.9855	57.6664
2R	scaffold1519.1	22259	24932	34.5138	32.4879
2R	scaffold1519.1	24999	32246	53.0632	52.7899
2R	scaffold1519.1	14904	16650	57.0052	103.561
2R	scaffold1519.1	32347	32941	147.331	157.188
3L	scaffold152.1	6654	9463	18.0426	19.979
3L	scaffold152.1	9524	11777	26.7553	28.1612
3L	scaffold152.1	14076	14756	10.4868	9.64843
3L	scaffold152.1	24691	26780	20.0722	21.1304
3L	scaffold152.1	27769	29566	11.7765	8.72541
3L	scaffold152.1	30314	32552	15.9953	20.417
3L	scaffold152.1	44121	48610	85.1018	89.943
3L	scaffold152.1	51356	53481	19.7088	15.2035
3L	scaffold152.1	54414	55873	52.3825	54.8172
3L	scaffold152.1	62859	67402	22.4236	20.4218
3R	scaffold1523.1	32	2559	102.14	125.297
3R	scaffold1523.1	2856	5909	53.8264	64.6682
3R	scaffold1523.1	6458	7189	4.77762	12.0729
3R	scaffold1523.1	7855	11600	15.9607	16.738
3R	scaffold1529.1	5511	13239	11.5409	11.6024
3L	scaffold1530.1	4458	5051	9.69715	13.1727
3L	scaffold1530.1	10030	10903	56.9387	82.6515
3L	scaffold1530.1	11290	11947	100.432	97.1598
3L	scaffold1530.1	19487	20127	19.7082	24.5788
3L	scaffold1530.1	15079	19351	16.8658	18.1113
2R	scaffold1531.1	4363	12542	56.5726	52.1315
2R	scaffold1531.1	13652	14389	805.296	750.639
2R	scaffold1531.1	14482	17034	15.1567	15.215
3L	scaffold1532.1	126	6593	48.5221	36.9357
3L	scaffold1532.1	10363	12130	132.133	99.5824
2R	scaffold1538.1	9052	22208	15.8997	13.6249
3L	scaffold154.1	4925	14240	34.4977	36.7814
3L	scaffold154.1	21307	36178	12.379	11.6924
2L	scaffold1541.1	25946	26515	11.7794	9.32757
3L	scaffold1542.1	1939	10086	40.2653	33.3515
3L	scaffold1542.1	13722	20022	18.5314	22.1423
2L	scaffold1543.1	234	5991	30.152	29.971
2L	scaffold1543.1	6868	12697	25.505	24.3519
2L	scaffold1543.1	13060	14357	10.3129	8.98398
2L	scaffold1543.1	14914	15908	9.9038	12.6789
2L	scaffold1543.1	17055	18465	9.35773	7.99348
2L	scaffold1545.1	3184	4975	16.6428	15.5819
2L	scaffold1545.1	5359	6369	63.2793	69.1864
2L	scaffold1545.1	6762	9954	38.6183	38.3825
2L	scaffold1545.1	11186	19982	30.5536	28.2692
X	scaffold1546.1	625	4907	13.845	12.9296
X	scaffold1546.1	14392	15397	173.491	208.503
2R	scaffold1547.1	1982	9949	72.1812	70.1579
2R	scaffold1547.1	10431	14857	15.6784	18.6593
2R	scaffold1547.1	16741	17354	71.7395	60.6929
3R	scaffold155.1	42777	44925	171.231	139.795
3R	scaffold155.1	50821	51439	173.967	137.466
3R	scaffold155.1	51859	53238	10.1992	10.0086
3R	scaffold155.1	53875	54654	16.1313	20.8612
3R	scaffold155.1	54764	55637	17.3834	14.9995
3R	scaffold155.1	65927	68429	82.9171	85.9997
3R	scaffold155.1	72208	73024	9.86385	9.90748
3R	scaffold155.1	4881	18416	263.695	263.518
3R	scaffold1556.1	6057	7878	123.304	124.926
3R	scaffold1556.1	14313	16098	45.3765	57.7399
3R	scaffold1556.1	20961	23344	125.14	139.566
3R	scaffold1556.1	34209	35878	9.11011	8.67481
3R	scaffold1556.1	37027	41894	14.878	11.6256
3R	scaffold1556.1	54724	57418	16.7825	15.4143
3R	scaffold1556.1	57844	58986	12.7507	11.9059
3R	scaffold1556.1	58691	60143	25.5683	26.6971
3R	scaffold1556.1	60736	64166	11.0043	11.4915
3R	scaffold1556.1	29726	33736	15.6712	15.7153
3L	scaffold1559.1	1609	7279	41.9947	39.8972
2R	scaffold1561.1	10223	14059	11.5049	11.5755
2R	scaffold1561.1	14121	14762	14.6424	13.4523
2R	scaffold1561.1	17607	18381	23.6807	19.0382
2R	scaffold1561.1	19742	22426	25.2679	26.7111
2R	scaffold1561.1	27631	28248	14.2191	10.1256
2R	scaffold1561.1	14853	17490	32.5286	29.1125
X	scaffold1562.1	7416	8144	12.4899	17.1982
X	scaffold1562.1	8204	9949	13.3249	9.68186
X	scaffold1562.1	12262	12934	16.3847	14.9276
X	scaffold1562.1	13339	15855	13.4046	14.9807
X	scaffold1562.1	17474	20496	20.3936	22.2439
X	scaffold1562.1	21127	22656	12.6443	10.9583
X	scaffold1562.1	16024	17406	42.9756	52.405
X	scaffold1566.1	5064	6950	8.77437	11.3486
2L	scaffold1569.1	2866	5267	11.8534	9.86802
2L	scaffold1569.1	5329	14737	15.1627	10.2968
2L	scaffold1569.1	17115	19117	87.6387	96.6793
2L	scaffold1569.1	20097	21426	11.6526	9.21671
2L	scaffold1569.1	25491	27090	8.80553	6.61692
2L	scaffold1569.1	28197	30592	26.3292	23.2167
2L	scaffold1569.1	41154	42247	55.4756	55.412
2L	scaffold1569.1	15145	16540	893.71	1103.5
3R	scaffold157.1	3499	9748	31.9863	26.9818
3R	scaffold157.1	53154	54398	10.3453	8.47978
3R	scaffold157.1	25500	34253	65.583	61.747
3R	scaffold157.1	48130	50242	15.7764	16.0146
2R	scaffold1573.1	2864	4904	82.8938	87.4176
2R	scaffold1573.1	6376	9308	55.0723	59.2048
2R	scaffold1573.1	15613	16367	8.74815	6.71671
3R	scaffold1574.1	12	2799	19.4695	21.0381
3R	scaffold1574.1	4241	6457	21.8125	20.4701
3R	scaffold1574.1	6503	7181	28.3949	25.8361
3R	scaffold1574.1	7742	15547	42.3256	43.5363
3R	scaffold1574.1	25262	27830	38.1725	36.9151
3L	scaffold1577.1	13221	13812	167.105	195.75
3L	scaffold1578.1	1650	2225	11.978	11.0711
3L	scaffold1578.1	16126	19638	20.3947	18.2312
2R	scaffold158.1	4805	8669	41.1387	40.1387
2R	scaffold158.1	9016	12392	19.4545	20.3411
2R	scaffold158.1	17811	25020	19.4813	16.6706
2R	scaffold158.1	25221	26597	20.2309	21.6801
2R	scaffold158.1	26897	29811	43.3907	36.4021
2R	scaffold158.1	29865	30715	16.9808	21.8288
2R	scaffold158.1	33772	34981	18.9721	17.413
2R	scaffold158.1	38261	40500	173.355	146.627
2R	scaffold158.1	40973	41949	68.2581	58.3275
2R	scaffold158.1	43433	44302	176.942	94.3393
2R	scaffold158.1	44663	45440	37.3909	28.6597
2R	scaffold158.1	51170	53379	22.5772	22.162
2R	scaffold158.1	53830	55996	12.6523	11.8143
2R	scaffold158.1	13028	17737	28.333	23.3298
2R	scaffold158.1	47610	50856	40.4268	36.4867
2R	scaffold158.1	63485	83920	19.8488	20.3924
2L	scaffold1584.1	11	1589	19.5807	21.6381
2L	scaffold1584.1	5047	6143	10.7378	15.8043
2L	scaffold1584.1	10755	11709	2088.93	1722.93
2L	scaffold1584.1	14514	15615	1008.62	1159.12
2L	scaffold1584.1	35626	37036	23.0319	20.8869
2L	scaffold1584.1	37106	39269	25.996	26.6553
2L	scaffold1584.1	40374	40898	16.1385	16.9235
2L	scaffold1584.1	29102	34101	351.3	324.429
2R	scaffold1585.1	25787	27289	42.3089	4.77607
3R	scaffold1586.1	1356	15999	14.4645	15.6541
3L	scaffold1587.1	3652	6144	9.60077	8.82866
3L	scaffold1587.1	8038	11760	178.092	185.773
3L	scaffold1587.1	12132	13151	20.8712	18.7727
3L	scaffold1587.1	13584	15660	31.8674	29.0344
3L	scaffold1587.1	21999	23533	8.96525	9.80957
3L	scaffold1587.1	28549	29220	11.7493	8.25151
3L	scaffold1587.1	31089	31744	54.0096	50.1792
3L	scaffold1587.1	16254	21527	14.5787	16.6814
3L	scaffold1587.1	29970	32926	27.6709	26.8711
X	scaffold1588.1	1977	2883	23.2396	25.8368
X	scaffold1588.1	5393	8688	60.8421	56.4537
X	scaffold1588.1	18920	24219	39.2322	29.7802
2R	scaffold159.1	1	587	12.0689	10.1211
2R	scaffold159.1	1338	8380	18.3907	14.9761
2R	scaffold159.1	37189	39425	76.637	82.9089
2R	scaffold159.1	56972	58369	225.1	198.558
2R	scaffold159.1	60343	61072	10.885	9.10752
2R	scaffold159.1	48824	52526	183.038	148.611
3L	scaffold1591.1	681	4102	36.6958	42.592
3L	scaffold1591.1	23752	24346	7.70678	12.3686
3L	scaffold1591.1	34238	39846	58.3659	60.5225
2L	scaffold1592.1	510	3293	37.8254	32.2107
2L	scaffold1592.1	4289	9483	22.0683	21.0158
3L	scaffold1595.1	4222	4937	8.24931	10.0417
3L	scaffold1595.1	6633	7985	45.6833	46.5025
3L	scaffold1595.1	8054	10113	16.9189	17.0832
3L	scaffold1595.1	10694	12820	155.158	159.381
3L	scaffold1595.1	13082	15280	19.6185	16.8737
3L	scaffold1595.1	15692	29914	15.9724	18.0719
X	scaffold1596.1	156	3570	275.259	351.884
X	scaffold1596.1	16355	19646	117.614	142.848
2R	scaffold1598.1	13658	14253	23.7451	23.1258
2R	scaffold1598.1	30067	44920	14.0479	13.4862
X	scaffold1600.1	2928	3892	17.1712	14.67
X	scaffold1600.1	4200	7284	36.8595	35.4648
X	scaffold1600.1	10661	11354	57.1273	40.3261
X	scaffold1600.1	13589	16188	9.77369	11.4245
X	scaffold1600.1	16569	19626	28.1704	30.2171
2L	scaffold1603.1	78	2246	6.98275	11.4723
2L	scaffold1603.1	2333	8196	11.8732	14.3793
2L	scaffold1603.1	9326	11406	7.11435	10.0799
2L	scaffold1603.1	12164	14145	37.8515	35.8339
2L	scaffold1603.1	18428	20775	14.4008	13.8591
3L	scaffold1605.1	4297	5407	8.94092	11.4454
3L	scaffold1605.1	6711	7594	28.9645	29.8251
3L	scaffold1605.1	9478	11398	17.3628	17.7254
3L	scaffold1605.1	12453	13250	19.6037	19.4595
3L	scaffold1605.1	14238	15998	14.8117	14.3295
3L	scaffold1605.1	22499	23242	12.4256	9.11637
3L	scaffold1605.1	23414	26417	9.12496	9.31809
3L	scaffold1605.1	26610	30708	19.083	19.25
3L	scaffold1605.1	34803	36832	22.4965	21.3673
3L	scaffold1605.1	36963	38357	18.4993	18.1167
3L	scaffold1605.1	38660	39550	10.9937	10.5172
3L	scaffold1605.1	39974	40699	14.1644	12.5454
3L	scaffold1605.1	40757	42678	10.2439	9.61663
3L	scaffold1605.1	42739	45847	9.83587	8.1108
3L	scaffold1605.1	46347	47483	18.395	15.7533
3L	scaffold1605.1	16094	21818	11.4542	10.2793
3L	scaffold1605.1	32055	34743	46.3293	41.2026
3R	scaffold1606.1	17888	21592	27.9939	30.0584
3R	scaffold1606.1	22357	24192	64.5028	61.4548
2R	scaffold1607.1	21060	22318	432.627	505.715
2R	scaffold1607.1	25691	26660	16.2727	13.9674
2R	scaffold1607.1	12441	20902	17.9453	16.9368
X	scaffold1608.1	5425	6231	7.97176	9.37443
3L	scaffold1610.1	1118	2096	9.9886	9.96978
3L	scaffold1610.1	6080	7318	8.67824	6.33283
3L	scaffold1610.1	8001	8586	9.87261	9.5776
3L	scaffold1610.1	8674	11957	13.4945	10.5163
3L	scaffold1610.1	15704	19560	20.8752	19.1876
3L	scaffold1613.1	2	6730	62.9359	53.7447
3R	scaffold1617.1	5050	7259	11.7888	17.3672
3R	scaffold1617.1	6417	8189	17.3245	12.3581
3R	scaffold1617.1	8543	9901	19.3518	23.0357
3R	scaffold1617.1	11441	26742	50.6923	51.4381
X	scaffold1619.1	7637	14153	9.95326	9.09551
X	scaffold1619.1	14924	17211	11.181	9.09077
3R	scaffold1622.1	8	2200	15.2963	15.2629
3R	scaffold1622.1	9481	38855	52.5671	47.4163
3L	scaffold1623.1	6	958	7.38839	8.96252
3L	scaffold1623.1	1057	2606	10.792	10.1176
3L	scaffold1623.1	25605	27198	11.2981	14.6065
3L	scaffold1623.1	27605	28882	13.1499	14.3336
3L	scaffold1623.1	15807	21210	28.0767	41.3533
X	scaffold1624.1	4546	9205	15.4608	10.4014
X	scaffold1624.1	9880	21247	13.0956	10.017
2R	scaffold1625.1	115	4815	206.733	173.063
2R	scaffold1625.1	8097	8662	20.4345	21.3326
2R	scaffold1625.1	9012	11773	8.10613	8.94165
2R	scaffold1625.1	12213	14477	34.7365	28.6107
2R	scaffold1625.1	17743	19214	69.6318	63.6883
2L	scaffold1627.1	13344	17503	16.4786	16.9365
X	scaffold1628.1	583	8560	31.189	31.8496
X	scaffold1628.1	9530	14007	42.7867	51.2374
X	scaffold1628.1	18758	20462	10.152	6.62825
2R	scaffold1630.1	14804	18101	274.407	275.953
2R	scaffold163.1	49543	51453	10.7206	10.8507
2R	scaffold163.1	52552	53708	8.93767	9.48963
2R	scaffold163.1	63043	63721	28.7387	23.6552
2R	scaffold163.1	65967	67897	21.8892	18.3626
2R	scaffold163.1	67960	69483	16.0324	12.5042
2R	scaffold163.1	70238	72129	43.6175	43.0299
2R	scaffold163.1	74161	76226	33.6571	31.1305
2R	scaffold163.1	87157	90134	17.046	15.8664
2R	scaffold163.1	77582	91588	38.7218	36.142
X	scaffold1631.1	513	1463	24.5934	24.9113
X	scaffold1631.1	8293	10053	13.6453	12.5555
X	scaffold1632.1	958	1969	74.3999	61.7711
X	scaffold1632.1	17452	18723	13.7844	13.1295
X	scaffold1632.1	6685	17160	23.1141	21.8833
3R	scaffold1633.1	3266	4824	20.182	20.2061
3R	scaffold1633.1	16695	20244	26.4187	31.9376
2R	scaffold1635.1	10371	13436	21.303	17.7737
2R	scaffold1635.1	13632	15804	33.7239	25.1913
2R	scaffold1635.1	14926	19119	259.607	205.471
X	scaffold1637.1	1696	11718	66.1814	60.0992
X	scaffold1637.1	12137	12670	8.39492	8.71589
X	scaffold1637.1	18315	19267	16.3633	13.1778
3L	scaffold1638.1	4046	8604	59.2771	56.6036
3L	scaffold1638.1	18269	20078	22.5287	24.2399
3L	scaffold1638.1	20889	25189	36.3178	36.6268
3L	scaffold1638.1	25837	28260	50.0971	45.6243
3L	scaffold1638.1	8730	17051	120.689	109.829
2R	scaffold1641.1	15586	27016	9.83089	10.6961
2L	scaffold1642.1	2584	3149	21.0584	16.2721
2L	scaffold1642.1	4731	7800	20.0998	19.389
2L	scaffold1642.1	10247	13591	55.4178	47.2834
3L	scaffold1643.1	6991	9408	9.96655	13.981
3L	scaffold1643.1	19955	23225	272.318	293.289
2L	scaffold1644.1	25916	31010	10.6306	10.4983
2L	scaffold1644.1	2055	18617	9.11858	6.53943
3R	scaffold1645.1	198	1228	78.8985	74.5866
3R	scaffold1645.1	1552	2274	51.5317	46.5037
3R	scaffold1645.1	8478	11500	16.6769	14.0363
3R	scaffold1645.1	18376	19204	55.9494	54.7664
3R	scaffold1645.1	12110	18270	32.1997	26.5801
X	scaffold1646.1	5264	8894	36.0822	43.0877
X	scaffold1646.1	24733	27056	14.0974	21.7055
X	scaffold1646.1	11630	22278	14.2606	13.8284
3R	scaffold1649.1	527	3451	18.5124	18.4581
3R	scaffold1649.1	3861	6900	44.1525	42.8453
3R	scaffold1650.1	8441	11650	13.4682	15.1352
3R	scaffold1650.1	11711	13319	10.0429	11.0881
3R	scaffold165.1	4770	6632	9.97687	11.4062
3R	scaffold165.1	7564	8865	21.3349	25.4001
3R	scaffold165.1	29246	30943	10.4841	14.7421
3R	scaffold165.1	59609	61494	16.7522	18.0993
3R	scaffold165.1	82052	82748	41.0914	40.8373
3R	scaffold165.1	85952	88624	9.38119	9.90998
3R	scaffold165.1	88745	90774	18.2577	17.8397
3R	scaffold165.1	94905	96222	36.7898	52.3702
3R	scaffold165.1	9191	23709	11.7162	15.4706
2L	scaffold1652.1	8156	9698	35.4242	27.4266
3R	scaffold1654.1	10	991	26.9859	26.7133
3R	scaffold1654.1	7175	9292	11.3777	11.0668
3R	scaffold1654.1	10384	12132	62.3348	67.3717
3R	scaffold1654.1	13185	14395	754.844	781.962
3R	scaffold1654.1	20487	21729	10.3243	9.8455
3R	scaffold1654.1	28069	30068	341.083	262.78
3R	scaffold1654.1	14720	20213	72.5001	76.3821
2R	scaffold1655.1	1460	3594	23.4074	23.3991
2R	scaffold1655.1	3970	6952	1173.63	1047.27
2R	scaffold1655.1	19833	21436	11.6926	8.56764
3L	scaffold1656.1	12349	23246	25.9746	23.8348
3R	scaffold1657.1	27019	32068	32.4632	25.7928
3R	scaffold1657.1	33977	35165	24.3385	20.3738
2R	scaffold166.1	36242	40355	34.9774	36.7017
2R	scaffold166.1	50539	54167	33.104	39.3787
2R	scaffold166.1	54026	54755	54.4704	53.9813
2R	scaffold166.1	16236	22179	13.8164	15.7725
2R	scaffold166.1	64186	68459	35.2754	32.2624
2R	scaffold166.1	74542	82347	144.93	136.335
X	scaffold1662.1	99	1669	20.4031	19.2019
X	scaffold1662.1	1762	3155	47.8444	79.9702
X	scaffold1662.1	3866	5437	10.8889	8.82565
X	scaffold1662.1	5526	6149	20.8585	21.8926
X	scaffold1662.1	8978	10133	9.2392	9.63984
X	scaffold1662.1	20676	21619	56.3598	62.6758
X	scaffold1662.1	28881	29499	135.067	121.126
3R	scaffold1663.1	4566	6382	24.548	21.4576
3R	scaffold1663.1	8709	10102	7.11465	8.94906
3R	scaffold1663.1	10279	11466	49.1577	47.5206
3R	scaffold1663.1	11747	14817	32.1923	35.1278
3R	scaffold1663.1	19344	21863	62.9617	70.8862
3R	scaffold1663.1	34475	36386	16.222	16.8078
3R	scaffold1663.1	15273	16499	11.7494	14.6131
3L	scaffold1666.1	1	8443	21.6424	21.8336
3L	scaffold1666.1	8508	12252	46.0452	38.467
3L	scaffold1666.1	13783	15251	11.79	10.6357
3L	scaffold1666.1	15981	18739	9.08158	9.42567
3R	scaffold1667.1	669	7368	23.1873	20.8064
3R	scaffold1667.1	7472	10194	15.4276	8.75127
3R	scaffold1667.1	11384	13314	21.7821	26.4526
3R	scaffold1667.1	15154	23155	82.7935	124.17
2R	scaffold167.1	14033	14575	31.5728	26.3577
2R	scaffold167.1	17862	21540	32.2593	27.6104
2R	scaffold167.1	23049	25601	19.4239	23.815
2R	scaffold167.1	37576	40550	28.5604	29.4367
2R	scaffold167.1	40615	48265	45.967	48.1823
2R	scaffold167.1	50402	52594	81.1833	81.7634
2R	scaffold167.1	53130	53986	45.0105	43.752
2R	scaffold1671.1	10829	14758	16.3246	14.0343
2R	scaffold1671.1	17757	19806	87.3407	71.7269
2R	scaffold1671.1	19869	20599	358.421	421.633
2R	scaffold1671.1	20975	23946	156.655	143.679
2R	scaffold1671.1	24916	25904	25.1	25.785
2R	scaffold1671.1	26402	27399	58.9521	58.5176
3R	scaffold1673.1	24131	27287	14.714	12.1807
3R	scaffold1673.1	740	19944	32.1252	61.4234
2L	scaffold1675.1	2817	4814	13.1789	12.6977
2L	scaffold1675.1	4869	6366	9.74674	9.15941
2L	scaffold1675.1	6555	7633	12.7754	14.4959
2L	scaffold1675.1	11045	11632	9.22945	10.2951
2L	scaffold1675.1	12591	16334	8.02996	9.34645
2R	scaffold1677.1	2047	4722	102.716	97.1266
2R	scaffold1677.1	5054	6975	118.403	106.754
2L	scaffold1679.1	19213	19842	22.306	25.8558
3R	scaffold1680.1	2145	3925	17.5372	18.0124
3R	scaffold1680.1	4452	5674	25.2456	43.7146
3R	scaffold1680.1	10036	16873	47.1492	55.5812
3L	scaffold168.1	989	2865	139.677	126.682
3L	scaffold168.1	7472	9715	26.0525	34.14
3L	scaffold168.1	10057	12981	9.64936	9.02205
3L	scaffold168.1	13072	14210	13.7074	11.1686
3L	scaffold168.1	17404	19860	9.78908	6.04753
3L	scaffold168.1	35319	37671	49.3556	57.06
3L	scaffold168.1	36878	39031	96.1307	129.876
3L	scaffold168.1	40977	41970	17.6183	20.4748
3L	scaffold168.1	29614	34559	63.5909	62.8937
3L	scaffold1684.1	3697	8781	30.2234	33.9289
2L	scaffold1687.1	10274	13929	813.552	735.105
2R	scaffold1689.1	12729	13763	7.12615	8.71973
2R	scaffold1689.1	16901	18513	95.8425	85.8837
2L	scaffold1690.1	25	687	8.95191	16.474
2L	scaffold1690.1	45266	62769	27.309	27.142
X	scaffold1692.1	3111	5524	14.3588	14.1025
X	scaffold1692.1	8969	9508	16.7747	13.5708
3R	scaffold1694.1	245	1351	31.7043	37.8179
3R	scaffold1694.1	5805	6970	10.6782	9.21748
3R	scaffold1695.1	2028	4912	35.8752	38.1661
3R	scaffold1695.1	5085	6645	10.5208	9.51167
3R	scaffold1695.1	9517	11590	7.58448	6.80593
3R	scaffold1695.1	28814	29338	11.9621	10.4961
3L	scaffold1697.1	259	1244	99.2892	100.249
3L	scaffold1697.1	2156	3867	11.9868	13.6184
3L	scaffold1697.1	4483	6169	43.1906	44.0351
3L	scaffold1697.1	7955	12459	15.5971	12.4222
2R	scaffold1698.1	21897	24888	68.2509	70.2021
3R	scaffold1700.1	16430	25363	100.246	88.4376
3R	scaffold1700.1	36156	37859	12.6202	9.53092
3R	scaffold1700.1	45189	46753	9.81904	9.81525
3R	scaffold1700.1	47005	48815	8.55302	9.44113
3R	scaffold1700.1	49169	51532	29.31	27.1364
3R	scaffold1700.1	51730	54738	366.574	351.901
3R	scaffold1700.1	68826	70811	9.05768	10.9969
3R	scaffold1700.1	71835	76923	174.374	172.274
3R	scaffold1700.1	77024	79282	342.032	369.687
3R	scaffold1700.1	85969	88039	9.51371	8.89643
3R	scaffold1700.1	64720	68625	40.5218	44.5386
3R	scaffold1700.1	80682	82383	37.5408	30.9015
3R	scaffold170.1	1461	2650	150.448	149.5
3R	scaffold170.1	3540	26322	64.5956	63.7977
3R	scaffold170.1	26381	39334	29.5056	32.7928
3R	scaffold170.1	40447	49571	30.9002	30.3206
2L	scaffold1702.1	18206	19012	21.803	21.8179
2L	scaffold1702.1	20216	30379	230.531	222.289
X	scaffold1703.1	11360	13027	13.0019	13.8614
X	scaffold1703.1	13998	15543	14.4657	15.6005
X	scaffold1703.1	18170	19019	13.8482	11.2219
X	scaffold1703.1	19087	19899	11.2192	9.37503
X	scaffold1703.1	21724	22362	13.5043	12.126
X	scaffold1703.1	16087	17981	12.6442	12.183
3R	scaffold1704.1	3727	5018	7.95927	8.97317
3R	scaffold1704.1	5835	7383	8.44207	7.9288
3R	scaffold1704.1	8251	10994	13.5923	12.9361
3R	scaffold1704.1	13329	14605	9.53476	11.2677
3R	scaffold1704.1	18394	19504	89.3748	101.107
3R	scaffold1705.1	4991	6048	12.12	11.4519
3R	scaffold1705.1	6507	7344	10.6629	11.4074
3R	scaffold1705.1	9957	12008	10.5029	9.90689
3R	scaffold1705.1	17043	18633	24.0411	21.552
3R	scaffold1705.1	15290	16802	14.5093	13.2262
2L	scaffold1706.1	217	3632	52.9462	52.5944
3R	scaffold1708.1	11480	12251	8.75516	8.62089
3R	scaffold1708.1	13135	16003	306.746	253.94
3R	scaffold1708.1	17200	18142	855.953	980.866
3R	scaffold1708.1	20182	22309	13.9754	17.2499
3R	scaffold1708.1	22380	24224	10.6676	11.2842
2L	scaffold1710.1	6382	6924	21.9038	23.3509
2L	scaffold1710.1	12617	14305	13.5329	15.2539
2L	scaffold1710.1	14635	15532	8.01844	8.88863
2L	scaffold1710.1	17406	18375	35.3537	36.3692
2L	scaffold1710.1	16315	16926	13.2944	12.0901
X	scaffold1712.1	8	916	11.1648	10.3936
X	scaffold1712.1	3172	4302	19.2707	16.9838
X	scaffold1712.1	4962	6557	787.96	892.824
X	scaffold1712.1	7713	8474	8.62142	8.47991
X	scaffold1712.1	16891	17444	10.7436	10.4617
2L	scaffold1714.1	3292	5867	23.3817	22.5225
2L	scaffold1714.1	13696	14448	15.3348	16.9214
2L	scaffold1714.1	14925	17651	45.9727	51.8944
X	scaffold1717.1	344	6599	27.8627	25.876
X	scaffold1717.1	10999	14346	51.8486	43.4925
X	scaffold1717.1	16866	18409	13.8624	12.1356
X	scaffold1717.1	7125	16431	23.717	25.7902
3L	scaffold1718.1	57	4577	28.3905	26.3517
3R	scaffold172.1	5780	6663	9.75014	10.9038
3R	scaffold172.1	18714	20246	16.5851	21.3799
3R	scaffold172.1	20554	21402	58.8312	58.1815
3R	scaffold172.1	22565	23745	21.31	21.1443
3R	scaffold172.1	28594	30106	9.95037	7.07986
3R	scaffold172.1	36357	37978	19.4524	17.8726
3R	scaffold172.1	40824	43741	31.0221	29.4358
3R	scaffold172.1	44149	45510	42.6016	44.1804
3R	scaffold172.1	45842	47014	697.024	745.053
3R	scaffold172.1	65984	68222	7.87439	5.94829
3R	scaffold172.1	32382	34324	9.31714	10.0214
3R	scaffold172.1	64980	65926	14.7924	13.0891
X	scaffold1724.1	1289	5249	20.4536	14.7917
X	scaffold1724.1	6277	9787	16.1609	12.2906
X	scaffold1724.1	23738	24290	14.3872	16.1323
X	scaffold1726.1	1950	7965	21.2709	20.1662
X	scaffold1726.1	13033	18640	232.574	231.022
2R	scaffold1730.1	13667	21831	21.027	18.5594
2L	scaffold173.1	3439	5090	11.5598	9.85138
2L	scaffold173.1	6663	8023	13.2265	10.9943
2L	scaffold173.1	26325	29065	11.3148	9.94055
2L	scaffold173.1	33294	39854	20.2102	20.5085
2L	scaffold173.1	43471	44387	8.63928	15.671
2L	scaffold173.1	55029	60428	12.9659	14.5507
2L	scaffold173.1	66390	68002	64.0658	60.1614
2L	scaffold173.1	68657	69577	15.8763	18.9341
2L	scaffold173.1	70380	73745	30.9107	29.9695
2L	scaffold173.1	73910	75511	50.6645	50.131
2L	scaffold173.1	76291	77358	25.2141	26.0881
2L	scaffold173.1	77594	79049	22.775	21.4781
2L	scaffold173.1	79528	80447	21.259	17.3112
2L	scaffold173.1	80935	81531	11.5682	6.45838
2L	scaffold173.1	84588	86010	15.4357	13.9004
2L	scaffold173.1	85418	86761	17.4502	18.8946
2L	scaffold173.1	87488	88152	9.85419	9.64159
2L	scaffold173.1	9100	20621	92.1075	112.749
2L	scaffold173.1	30084	33023	16.0522	15.1267
2L	scaffold173.1	47550	50084	38.9127	37.2702
X	scaffold1731.1	7207	8121	16.7909	5.0394
X	scaffold1731.1	8528	9731	11.8859	12.428
X	scaffold1731.1	10049	15772	96.2595	108.304
X	scaffold1731.1	16822	19868	170.482	152.386
X	scaffold1731.1	22705	23352	9.30974	8.15676
3R	scaffold1732.1	50	1132	37.6268	36.0719
3R	scaffold1732.1	6177	13532	12.5449	13.0412
3R	scaffold1732.1	14046	15030	17.2308	15.3555
3R	scaffold1732.1	18065	20795	11.4682	14.6149
3R	scaffold1732.1	28976	29481	13.1329	10.1997
X	scaffold1733.1	1518	13053	596.695	481.45
2L	scaffold1735.1	3667	11195	63.505	56.9907
2L	scaffold1735.1	19355	20034	35.8553	37.369
2R	scaffold1737.1	2004	3203	71.998	65.2827
2R	scaffold1737.1	5932	8178	32.0381	26.1645
2R	scaffold1737.1	6489	9290	16.213	21.4908
2R	scaffold1737.1	9894	14673	11.923	11.4215
2R	scaffold1737.1	19755	29581	20.179	14.4453
2R	scaffold1737.1	15753	18368	71.1055	62.2657
X	scaffold1738.1	5390	6226	53.8686	50.8458
X	scaffold1738.1	6597	9930	213.138	200.768
X	scaffold1738.1	14177	16659	27.1241	30.0541
3R	scaffold1739.1	33158	36491	21.8077	24.8729
2L	scaffold174.1	1	1122	69.1359	63.9465
2L	scaffold174.1	23642	24393	24.6046	20.5082
2L	scaffold174.1	24713	26241	44.8198	37.9773
2L	scaffold174.1	49412	56693	67.6084	57.8882
2L	scaffold174.1	5667	18575	40.6032	32.6481
2L	scaffold174.1	26944	33543	47.6649	36.9171
2R	scaffold1743.1	2110	2883	8.44644	6.73506
2R	scaffold1743.1	7141	13939	22.9213	21.2159
2R	scaffold1743.1	17199	18167	16.8425	19.3636
2R	scaffold1743.1	14416	16890	23.2353	21.9058
3L	scaffold1744.1	1087	4414	12.468	11.421
3L	scaffold1744.1	4492	5038	43.5089	37.1653
3L	scaffold1744.1	6182	10373	42.1197	31.5679
2L	scaffold1745.1	3827	4390	14.0648	12.5272
2L	scaffold1745.1	5288	9776	13.3837	13.3124
2L	scaffold1746.1	8010	11621	32.6537	27.4308
2L	scaffold1746.1	12001	13361	13.7847	13.2882
3R	scaffold1748.1	1333	4619	29.2568	25.3026
3R	scaffold1748.1	5068	6911	14.1795	12.8127
3R	scaffold1748.1	10444	12084	250.942	213.952
3R	scaffold1748.1	14650	15900	8.05213	8.97753
2L	scaffold1749.1	16354	19585	35.0408	33.6234
3R	scaffold175.1	17028	19640	16.4894	18.792
3L	scaffold1751.1	8191	11965	9.52512	10.2079
3L	scaffold1751.1	12289	13976	10.5433	7.13259
2R	scaffold1752.1	10348	11538	164.744	146.507
2R	scaffold1753.1	1810	4088	55.6734	42.3723
2R	scaffold1753.1	4563	5330	21.9664	20.9617
2R	scaffold1753.1	7563	9110	18.8431	20.9619
2R	scaffold1753.1	14727	21509	13.3544	13.3516
2L	scaffold1755.1	26390	29042	21.0791	25.8946
2L	scaffold1755.1	29682	31996	51.2724	39.3544
X	scaffold1756.1	123	2527	39.5749	34.5536
X	scaffold1756.1	2893	4858	66.838	111.084
X	scaffold1756.1	6676	12719	15.7529	16.555
X	scaffold1756.1	12763	15208	36.2861	38.3895
X	scaffold1756.1	21307	21929	7.26317	9.39745
2L	scaffold1757.1	5432	7507	117.537	199.244
2L	scaffold1757.1	8563	12038	20.3394	17.8522
2L	scaffold1757.1	12134	16352	31.0211	24.7207
3L	scaffold1759.1	803	2189	54.229	41.9657
3R	scaffold1761.1	35820	37308	20.9673	20.4877
3L	scaffold1763.1	1087	10377	14.1017	11.5061
3R	scaffold1764.1	3729	6087	9.60329	8.46553
3R	scaffold1764.1	6145	6942	10.0306	8.33192
2R	scaffold1765.1	3329	4436	48.073	42.6193
2R	scaffold1765.1	6260	6904	41.1691	45.2183
2R	scaffold1765.1	23230	23870	11.2359	7.88697
2R	scaffold1765.1	33648	35477	28.6941	29.4923
2R	scaffold1765.1	36725	38537	6.87547	7.3157
3L	scaffold1766.1	1577	5963	39.9059	29.3193
3L	scaffold1766.1	23294	24460	11.6923	10.354
2L	scaffold1768.1	17262	18341	211.846	234.654
X	scaffold1770.1	109	3655	22.1336	27.1177
X	scaffold1770.1	3748	6470	14.475	17.149
X	scaffold1770.1	6973	17279	72.7442	81.8221
2R	scaffold177.1	260	5606	65.6598	65.2789
2R	scaffold177.1	6186	15258	140.304	144.652
2R	scaffold177.1	18369	20165	400.408	452.164
2R	scaffold177.1	19761	21213	245.873	225.437
2R	scaffold177.1	20782	23107	36.543	40.8136
2R	scaffold177.1	21314	24529	285.598	229.907
2R	scaffold177.1	42164	43870	23.4578	22.1941
2R	scaffold177.1	50934	51931	53.8316	49.8093
2R	scaffold177.1	53278	56517	36.6688	35.4678
2R	scaffold177.1	72477	75673	358.344	346.988
2R	scaffold177.1	77101	78981	13.927	12.9171
2R	scaffold177.1	84983	89389	26.568	21.8802
2R	scaffold177.1	90249	95396	48.069	40.5298
2R	scaffold177.1	44679	50113	38.5712	29.3114
2R	scaffold177.1	81656	84340	61.8199	51.3699
2R	scaffold1771.1	4951	5733	10.9434	8.05368
2R	scaffold1771.1	6183	10703	7.64724	8.04086
2R	scaffold1771.1	10755	14223	11.1552	11.2547
2R	scaffold1771.1	14316	15188	14.2421	10.6025
2R	scaffold1771.1	16185	18259	158.94	198.122
3R	scaffold1773.1	3649	5302	19.9658	22.4474
3R	scaffold1773.1	5507	8968	25.0694	25.7589
3R	scaffold1773.1	9985	11313	13.7017	12.8371
X	scaffold1774.1	838	2301	25.0449	25.9141
X	scaffold1774.1	7015	7817	368.346	403.176
X	scaffold1774.1	8556	9923	18.4834	19.923
X	scaffold1774.1	11065	12193	1210.69	1421.65
2R	scaffold1775.1	1436	2345	33.7197	27.214
2R	scaffold1775.1	5647	7090	360.417	372.406
2R	scaffold1775.1	9087	10087	9.31404	14.0326
2R	scaffold1775.1	10699	11772	8.63252	12.1173
2R	scaffold1775.1	11832	13103	11.0107	11.0301
2R	scaffold1775.1	13771	15478	11.0306	12.7004
2R	scaffold1777.1	18065	25730	28.1008	26.4043
2R	scaffold1777.1	15806	16629	18.006	17.7953
2R	scaffold1779.1	4078	6312	10.041	9.97813
2R	scaffold1779.1	6580	7709	15.5276	13.5733
2R	scaffold1779.1	9191	11132	13.1077	12.3736
2R	scaffold1779.1	11931	17067	17.5474	17.3139
3R	scaffold1780.1	11635	14895	17.176	16.7728
3R	scaffold1780.1	16584	23919	33.9527	32.5334
3R	scaffold178.1	8372	18226	169.156	278.744
X	scaffold1782.1	14062	18301	14.462	14.422
3R	scaffold1783.1	69677	72888	19.238	16.9127
2R	scaffold1784.1	1859	3669	59.2675	55.5126
2R	scaffold1784.1	3974	10475	45.4796	40.4794
2R	scaffold1784.1	12477	16058	9.73946	8.78804
2R	scaffold1784.1	17462	20627	313.08	270.004
2R	scaffold1784.1	15612	16637	11.8105	12.8813
X	scaffold1787.1	4076	7623	17.8491	17.4117
X	scaffold1787.1	17401	18272	18.466	22.6372
3R	scaffold179.1	59	12471	34.9247	35.2464
3R	scaffold179.1	13123	14963	59.5255	60.215
3R	scaffold179.1	18375	20000	15.3084	13.9121
3R	scaffold179.1	24484	25290	13.4177	13.0552
3R	scaffold179.1	29907	30926	9.88872	7.87635
3R	scaffold179.1	31444	32506	8.87108	8.99345
3R	scaffold179.1	15063	18032	25.0447	25.8949
2L	scaffold1791.1	24667	25420	11.025	6.70956
3R	scaffold1793.1	14991	16003	15.4505	14.5213
3L	scaffold1794.1	3369	5535	325.602	282.549
3R	scaffold1799.1	28	14498	17.0389	14.8066
2R	scaffold1800.1	11	4776	37.0666	30.6775
2R	scaffold1800.1	6818	9549	13.3768	14.2164
2R	scaffold1800.1	10378	10879	9.75803	7.68317
2R	scaffold180.1	8118	10557	18.3612	18.625
2R	scaffold180.1	24704	31204	22.8085	25.0999
2R	scaffold180.1	36152	36865	11.2725	12.4055
2R	scaffold180.1	36936	38022	10.3751	9.42088
2R	scaffold180.1	38161	41246	26.0538	24.2513
2R	scaffold180.1	42973	45255	101.48	119.528
2R	scaffold180.1	14313	24103	26.0515	23.2671
2R	scaffold180.1	31333	35919	29.5508	26.8547
3L	scaffold1802.1	4561	17991	34.0234	37.533
3L	scaffold1804.1	10484	13531	24.7181	24.4887
3L	scaffold1804.1	17490	18902	28.4025	26.4164
3L	scaffold1804.1	18974	22228	19.838	19.163
3L	scaffold1804.1	22532	23313	24.6273	26.8227
3L	scaffold1804.1	13985	17429	10.7341	10.3931
3L	scaffold1806.1	2006	18193	32.091	24.8323
3R	scaffold1807.1	17614	19030	17.0355	18.0098
3R	scaffold1807.1	2092	16887	39.6232	39.6427
2L	scaffold1808.1	37410	59112	244.363	206.448
X	scaffold1809.1	22	4490	19.7888	20.3123
X	scaffold1809.1	25680	28420	41.9734	48.7316
X	scaffold1809.1	5225	24628	13.2235	12.1189
3R	scaffold18.1	73144	74480	10.6561	12.5373
3R	scaffold18.1	141272	142657	16.7684	17.3231
3R	scaffold18.1	142719	143289	14.973	15.8244
3R	scaffold18.1	152117	157433	17.5712	14.5944
3R	scaffold18.1	157492	169555	17.716	16.9885
3R	scaffold18.1	96109	140412	41.4223	40.4025
2L	scaffold181.1	22193	23687	271.325	261.932
2L	scaffold181.1	29059	31883	45.6936	41.8229
2L	scaffold181.1	61015	64629	40.879	39.7739
2L	scaffold181.1	69391	71793	172.524	222.61
2L	scaffold181.1	76231	77001	12.8177	8.71902
2L	scaffold181.1	78166	79604	19.9611	23.4585
2L	scaffold181.1	32156	39110	33.0106	31.4977
2L	scaffold181.1	39254	67309	40.6086	36.7434
2R	scaffold1812.1	10988	11874	8.68702	9.48049
2R	scaffold1812.1	94892	112124	40.7974	36.9155
3L	scaffold1814.1	965	6199	17.3182	15.6992
3R	scaffold1816.1	2731	5708	34.0698	40.2117
3R	scaffold1816.1	6957	9905	9.11177	9.0744
3R	scaffold1816.1	10185	12157	22.096	18.5528
2R	scaffold1817.1	333	2548	8.48747	10.6891
2R	scaffold1817.1	8724	9955	63.451	63.2676
2R	scaffold1817.1	11789	15311	98.5353	85.7101
2L	scaffold182.1	46336	68886	31.0727	31.2482
3R	scaffold1824.1	5870	13501	38.2369	45.4746
3R	scaffold1824.1	15542	17839	9.96996	11.9489
2R	scaffold1825.1	1534	2713	745.763	685.502
2R	scaffold1825.1	7897	9212	55.6489	50.6545
3R	scaffold1830.1	16344	17941	9.926	8.27555
3L	scaffold1832.1	23982	25298	45.3989	37.0985
3L	scaffold1834.1	1058	7074	24.208	19.8198
3L	scaffold1834.1	20964	22598	17.3785	17.3246
3L	scaffold1834.1	23099	24472	528.118	798.208
3L	scaffold1834.1	25169	28823	8.60305	8.13113
3L	scaffold1835.1	13135	13813	9.47702	7.96776
3L	scaffold1835.1	36764	38121	8.58607	9.91131
3L	scaffold1836.1	382	7399	168.336	146.057
3L	scaffold1836.1	7546	12499	174.604	156.242
3L	scaffold1836.1	17046	18364	8.08013	7.14255
3L	scaffold1836.1	16267	16985	13.324	12.9586
3L	scaffold1838.1	23849	24861	10.6763	9.26253
3L	scaffold1838.1	27039	29556	9.02398	12.8496
3L	scaffold1838.1	34199	35661	11.7612	17.8367
3L	scaffold1838.1	29656	34139	6.58931	7.58836
2R	scaffold1839.1	2568	6002	17.9538	13.9353
2R	scaffold1839.1	6297	7213	16.6753	14.31
2R	scaffold1839.1	8026	12937	16.5827	16.5014
2R	scaffold1839.1	13545	15709	44.3942	39.8207
2R	scaffold1839.1	17760	21620	16.7615	14.247
2R	scaffold1839.1	24132	30932	128.46	220.168
2R	scaffold1839.1	15781	17141	17.8016	18.0432
X	scaffold1840.1	10755	13007	7.63369	11.834
X	scaffold1840.1	15602	16629	17.4924	14.1936
X	scaffold184.1	1721	11983	16.439	13.2823
X	scaffold184.1	18623	19455	166.399	70.2961
X	scaffold184.1	19937	22352	57.3706	56.409
X	scaffold184.1	23117	25190	33.274	25.0053
X	scaffold184.1	31255	31892	13.6969	9.68345
X	scaffold184.1	33931	37708	123.033	140.396
X	scaffold184.1	38907	39898	8.68694	9.88927
X	scaffold184.1	61801	63404	9.09393	10.8826
X	scaffold184.1	44846	58376	82.801	81.5523
3L	scaffold1841.1	10373	13646	25.942	23.1464
3L	scaffold1842.1	35903	36500	15.4933	17.3693
3L	scaffold1842.1	4721	31473	22.2304	22.3982
3L	scaffold1842.1	31965	35402	23.1738	24.9041
X	scaffold1844.1	25	3309	12.9688	13.7381
X	scaffold1844.1	6465	12001	128.116	107.449
X	scaffold1844.1	13206	15994	86.1855	71.7628
X	scaffold1844.1	17277	21156	25.1495	23.595
2L	scaffold1846.1	24642	25454	16.0154	27.6111
2L	scaffold1846.1	27441	32393	31.134	48.7805
2L	scaffold1847.1	1855	8763	55.4693	57.4908
2L	scaffold1847.1	9893	12955	23.8381	22.0676
2L	scaffold1847.1	26430	28224	53.7951	52.7884
2R	scaffold1849.1	2	1679	92.7818	119.753
2R	scaffold1849.1	7141	8452	17.0893	17.9048
2R	scaffold1849.1	8847	15520	29.5687	26.8423
2R	scaffold1849.1	17313	30221	50.3579	46.7484
2R	scaffold1849.1	35370	40509	16.9367	18.4364
2R	scaffold1850.1	5269	6388	8.49797	7.30128
2R	scaffold1850.1	7583	9336	65.2798	109.266
2R	scaffold1850.1	25359	26186	15.4721	14.8163
2R	scaffold1850.1	35708	36266	8.69078	8.18686
2R	scaffold1850.1	9946	22249	38.3721	29.6168
2R	scaffold1850.1	31068	33922	14.6394	12.3932
3L	scaffold185.1	23360	26844	80.5305	75.7917
3L	scaffold185.1	30613	31467	20.0917	11.918
3L	scaffold185.1	32820	33969	81.6759	66.8228
3L	scaffold185.1	34723	35860	17.9914	15.9963
3L	scaffold185.1	40798	42065	12.3708	12.2764
3L	scaffold185.1	43578	44975	9.86091	9.1506
3L	scaffold1852.1	1812	2455	15.7565	18.5364
3L	scaffold1854.1	4986	7455	9.58632	8.04428
3L	scaffold1854.1	10310	11559	8.94828	9.70361
3L	scaffold1854.1	12100	13996	11.3948	12.2146
3L	scaffold1854.1	14109	14738	14.7962	13.8086
3L	scaffold1854.1	14804	15826	24.8396	27.339
3L	scaffold1854.1	20358	22442	84.6533	134.613
3R	scaffold1856.1	21029	21994	73.5492	65.9414
3R	scaffold1856.1	22463	24695	29.2062	44.3642
3R	scaffold1856.1	25119	29411	12.8954	12.5202
3R	scaffold1856.1	41861	46895	291.219	245.232
3R	scaffold1856.1	4091	19621	158.974	284.737
2R	scaffold1857.1	37502	43282	15.5043	12.3057
2R	scaffold1857.1	23758	36361	14.9186	15.6847
2R	scaffold1858.1	6892	7585	13.2003	9.07155
2R	scaffold1858.1	8320	10870	10.7297	8.93474
2R	scaffold1858.1	24177	25677	12.1335	13.9391
2R	scaffold1858.1	26938	28935	29.1082	24.0605
2R	scaffold1858.1	35857	38489	39.7974	36.273
2R	scaffold1858.1	31630	35788	36.8959	33.7356
2R	scaffold1860.1	2007	4448	16.5758	12.4313
2R	scaffold1860.1	5541	6844	13.519	11.8191
2R	scaffold1860.1	7190	7711	5.42547	10.5597
2R	scaffold1860.1	9412	9951	8.44811	10.1308
2R	scaffold1860.1	10400	12199	23.3131	27.5593
2R	scaffold1860.1	18924	19767	17.4587	13.0556
2R	scaffold1860.1	19835	20852	26.1057	18.0461
2R	scaffold1860.1	21820	30028	24.2015	20.9286
2R	scaffold1860.1	29189	30456	7.47191	11.8883
2R	scaffold1860.1	13009	18846	18.8017	17.0132
3R	scaffold186.1	3193	4259	32.4838	34.5424
3R	scaffold186.1	5216	6286	92.9667	79.9277
[truncated: 6,320 more rows]
